# Supplementary material
Source: ML conference proceedings conference paper supplement (https://openreview.net/forum?id=MlrFYNo1yc)
Supplement: supplementary_material [file attachment]

---

# Minimum norm interpolation by shallow networks: Explicit regularization and implicit bias

---

Anonymous Author(s)

Affiliation

Address

email

## Abstract

1 We investigate how shallow ReLU networks interpolate between known regions  
2 as the number of data points and parameters tends to infinity. Our analysis yields  
3 convergence to a minimum norm interpolant when a weight decay regularizer is  
4 penalized with a coefficient which vanishes at a precise rate as the network width  
5 and the number of data points grow. With and without explicit regularization, we  
6 numerically study the implicit bias of common optimization algorithms towards  
7 known minimum norm interpolants.

## 8 1 Introduction

9 Modern neural networks mostly operate in an overparametrized regime, i.e. they possess more tunable  
10 parameters than the number of data points contributing to the loss function. Safran and Shamir  
11 [2018a], E et al. [2019b], Du et al. [2018], Chizat and Bach [2018] associate overparametrization with  
12 better training properties, and Belkin et al. [2019, 2020] find it to enhance statistical generalization  
13 (see also [Loog et al., 2020] for historical context). For many architectures, overparametrization  
14 leads to the ability to fit any values  $y_i$  at a given set of data points  $\{x_1, \dots, x_n\}$ , and Cooper [2018]  
15 shows that generically, the set of weights for which the neural network interpolates prescribed values  
16 is a submanifold of high dimension and co-dimension in parameter space. Which solution on the  
17 manifold is dynamically chosen by an optimization algorithm, and which solutions have favorable  
18 generalization properties, is an active area of research in theoretical machine learning.

19 Current practice is to estimate a model’s generalization to previously unseen data by assessing its  
20 performance on a hold-out set (a posteriori error estimate) or by using uniform estimates on the  
21 generalization of all elements of a function class (a priori estimate if the function class is encoded  
22 ahead of time by explicit regularization, a posteriori if membership is determined after optimization).  
23 Neither approach yields information on what a neural network does outside the support of the data  
24 distribution, a topic of great interest for the study of distributional shift and adversarial stability.

25 There are two complementary contributions of this work:

- 26 1. We prove that minimizers of regularized risk functionals converge to minimum norm  
27 interpolants of a given target function in an infinite parameter limit.
- 28 2. We study the performance of optimization algorithms by comparing numerical solutions to  
29 the minimum norm interpolant in cases where the latter is known explicitly. We believe this  
30 to be a useful benchmark problem for a better understanding of explicit regularization and  
31 implicit bias in optimization.

32 Minimum norm interpolants are the regression analogue to maximum margin classifiers. They are  
33 associated with favorable generalization properties and relative stability even against adversarial  
34 perturbations.

## 35 1.1 Previous work

36 **Minimum norm interpolation.** In classes of linear functions, minimum norm interpolation has a  
 37 long history as ridge regression (minimal  $\ell^2$ -norm) or as the least absolute shrinkage selection and  
 38 operator (LASSO, minimal  $\ell^1$ -norm). To the best of our knowledge, minimum norm interpolation by  
 39 neural networks has only been studied for shallow neural networks in one dimension by Hanin [2021]  
 40 and in odd dimension for certain radially symmetric data by Wojtowytsch [2022]. For classification  
 41 problems, minimum norm/maximum margin classifiers were considered by E and Wojtowytsch  
 42 [2022]. For finite datasets, the set of minimum norm interpolants was characterized by Parhi and  
 43 Nowak [2021]. A parametrization of the same function class by neural networks with multiple linear  
 44 layers and a single ReLU layer induces different concepts of minimum norm interpolation as studied  
 45 by Ongie and Willett [2022].

46 **Implicit bias.** The implicit bias of parameter optimization algorithms has been studied for gradient  
 47 flows with infinitely wide, but shallow ReLU networks by Chizat et al. [2019] and for stochastic  
 48 gradient descent and diagonal linear networks by Pesme et al. [2021]. Chizat and Bach [2020] prove  
 49 convergence to a maximum margin classifier for infinitely wide ReLU networks with one hidden layer  
 50 if the parameters follow the gradient flow of an (unregularized) logistic loss risk functional. Many  
 51 authors, including Damian et al. [2021], Li et al. [2021], Wu et al. [2022] and Wojtowytsch [2020],  
 52 study the bias of SGD towards solutions at which the loss landscape is ‘flat’ in the parameter space.  
 53 Hochreiter and Schmidhuber [1997] conjectured such minimizers to have favorable generalization  
 54 properties. In many cases, minimizers tend to be flatter if the parameters associated to them are not  
 55 excessively large. Yang et al. [2021] describe several phase-transitions in parameter space for the  
 56 relation between flatness in parameter space and generalization. Zhou et al. [2020] compare the  
 57 implicit bias of SGD and ADAM.

58 **Barron space.** The Barron class is adapted to ReLU networks with a single hidden layer and  
 59 weights of bounded average magnitude. Slightly different versions of the same function space have  
 60 been studied by Bach [2017], E et al. [2019a,c], Ongie et al. [2019], E and Wojtowytsch [2020, 2021],  
 61 Caragea et al. [2020], Parhi and Nowak [2021], Wojtowytsch [2022], Siegel and Xu [2022, 2023]  
 62 under various names such as  $\mathcal{F}_1$ , Radon-BV or the variation space of the ReLU dictionary.

## 63 1.2 Preliminaries

64 **Conventions.**  $\mu$  always denotes a  $\sigma^2$ -sub-Gaussian probability measure on the data domain  $\mathbb{R}^d$ , i.e.

$$\exists C, \sigma > 0 \quad \text{s.t.} \quad \mathbb{E}_{X \sim \mu} [\exp(\lambda\{\|X\| - \mathbb{E}\|X\|\})] \leq C \exp\left(\frac{\lambda^2 \sigma^2}{2}\right) \quad \forall \lambda > 0.$$

65 All norms are Frobenius norms ( $\ell^2$ -norm for vectors). For  $n \in \mathbb{N}$ ,  $S_n = \{x_{n,1}, \dots, x_{n,n}\}$  is a set of  
 66  $n$  iid samples from the distribution  $\mu$ , independent of  $S_{n'}$  for  $n' \neq n$ . When unambiguous, we denote  
 67  $x_{n,i} = x_i$ . We take  $\ell(f, y) = |f - y|^2$  as the mean squared error/ $\ell^2$ -loss function, but we remark that  
 68 the theoretical analysis remains valid if  $\ell_{MSE}$  is replaced by  $\ell^1$ -loss or a Huber or pseudo-Huber loss

$$\ell_{Hub}(f, y) = \begin{cases} |f - y|^2 & \text{if } |y - f| < 1 \\ 2|y - f| - 1 & \text{if } |y - f| \geq 1 \end{cases}, \quad \ell_{pH}(y, h) = \sqrt{1 + |y - f|^2} - 1.$$

69 For  $m \in \mathbb{N}$  and  $(a, W, b) \in \mathbb{R}^m \times \mathbb{R}^{m \times d} \times \mathbb{R}^{m+1}$ , let

$$f_{(a,W,b)} : \mathbb{R}^d \rightarrow \mathbb{R}, \quad f_{(a,W,b)}(x) = b_0 + \sum_{i=1}^m a_i \sigma(w_i \cdot x + b_i), \quad \sigma(z) = \text{ReLU}(z) = \max\{z, 0\},$$

70 i.e.  $f_{(a,W,b)}$  is a ReLU network with a single hidden layer and weights  $a, W$  and biases  $b$ . The vector  
 71  $w_i \in \mathbb{R}^d$  is the  $i$ -th row of the matrix  $W$ . For  $m, n \in \mathbb{N}$  and  $\lambda \geq 0$ , we denote the regularized  
 72 empirical risk functional as  $\widehat{\mathcal{R}}_{n,m,\lambda} : \mathbb{R}^m \times \mathbb{R}^{m \times d} \times \mathbb{R}^{m+1} \rightarrow [0, \infty)$ :

$$\widehat{\mathcal{R}}_{n,m,\lambda}(a, W, b) = \frac{1}{2n} \sum_{i=1}^n \ell(f_{(a,W,b)}(x_i), y_i) + \frac{\lambda}{2} (\|a\|_2^2 + \|W\|_{Frob}^2).$$

**Concepts.** We introduce what we dub ‘homogeneous Barron space’  $\mathcal{B}$  heuristically here, and in greater detail in Appendix C. As a measure of magnitude of the function, we consider the weight decay (or Tikhonov) regularizer  $\frac{1}{2}(\|a\|_2^2 + \|W\|_{Frob}^2)$  of the parametrized function  $f_{(a,W,b)}$  which does not control the magnitude of the bias vector.

Note that the function class  $f_{(a,W,b)}$  and its complexity do not change when we consider representations of the form  $f_m(x) = \frac{1}{m} \sum_{i=1}^m a_i \sigma(w_i \cdot x + b_i)$  with a regularizer  $\frac{1}{2m}(\|a\|_2^2 + \|W\|_{Frob}^2) = \frac{1}{2m} \sum_{i=1}^m (a_i^2 + \|w_i\|_2^2)$ . A continuum analogue to these functions represented as an ‘empirical average’ over individual neurons is a general expectation representation  $f_\pi(x) = \mathbb{E}_{(a,w,b) \sim \pi} [a \sigma(w^T x + b)]$  for some probability distribution  $\pi$  on parameter space and a regularizer  $\frac{1}{2} \mathbb{E}_{(a,w,b) \sim \pi} [a^2 + \|w\|_2^2]$ . As the parametrization of a function by a neural network is generally non-unique, we define the Barron semi-norm  $[f]_{\mathcal{B}} = \inf_{\{\pi: f_\pi \equiv f\}} \mathbb{E}_{(a,w,b) \sim \pi} [a^2 + \|w\|_2^2]$  as the lowest value attained by the regularizer over all possible parametrizations. For a more comprehensive understanding, interested readers may refer to Appendix C.

## 2 General convergence result

We first state a general convergence result to a minimum norm interpolant of given data generated by functions in the homogeneous Barron class  $\mathcal{B}$ .

**Theorem 2.1.** Take  $\mu, S_n, \hat{\mathcal{R}}_{n,m,\lambda}$  as in Section 1.2,  $f^* \in \mathcal{B}$ , and let  $y_i = f^*(x_i)$  for  $i = 1, \dots, n$ . Assume that  $m, \lambda$  are parameters which scale with  $n$  as  $m_n, \lambda_n$  such that

$$\lim_{n \rightarrow \infty} \left( \lambda_n + \frac{1}{m_n} \right) = 0, \quad \lim_{n \rightarrow \infty} \left( \frac{1}{\lambda_n m_n} + \frac{\log n}{\lambda_n \sqrt{n}} \right) = 0. \quad (1)$$

Then almost surely over the random selection of data points in  $S_n$ , the following holds: If  $(a, W, b)_n \in \operatorname{argmin} \hat{\mathcal{R}}_{n,m_n,\lambda_n}$  for all  $n \in \mathbb{N}$ , then every subsequence of  $f_n := f_{(a,W,b)_n}$  has a further subsequence which converges to some limit  $\hat{f}^* \in \mathcal{B}$  with  $\hat{f}^* = f^*$   $\mu$ -almost everywhere and  $[\hat{f}^*]_{\mathcal{B}} \leq [f^*]_{\mathcal{B}}$ . Convergence holds in  $L^p(\mu)$  for all  $p < \infty$  and uniformly on compact subsets of  $\mathbb{R}^d$ . If  $\mathbb{E}_\mu \|x\| + \sigma^2 \geq 1$ , then for all  $n \geq 2$ , the following explicit bound holds up to higher order terms in  $n, m = m_n, \lambda = \lambda_n$  with probability at least  $1 - 1/n^2$ :

$$\|f_{(a,W,b)_n} - f^*\|_{L^2(\mu)}^2 \leq C \left( \frac{[f^*]_{\mathcal{B}}^2}{m} \mathbb{E}_\mu [\|x\|^2] + [f^*]_{\mathcal{B}}^2 (\mathbb{E}_\mu \|x\| + \sigma^2) \frac{\log n}{\sqrt{n}} + \lambda [f^*]_{\mathcal{B}} \right). \quad (2)$$

If the data-distribution  $\mu$  is supported on the entire space  $\mathbb{R}^d$  (e.g. a non-degenerate Gaussian), then  $\hat{f}^* \equiv f^*$ . In many cases, however,  $\mu$  is supported on a small, potentially compact and generally low-dimensional subset  $M$  of the data space. In this case, the function  $f^*$  is only known on the closed set  $M \subsetneq \mathbb{R}^d$ . As a result, there are many  $f \in \mathcal{B}$  such that  $f \equiv f^*$  on  $M$  while  $f \not\equiv f^*$  on  $\mathbb{R}^d$  in general. The subsequential limit is one of these functions which has a minimal semi-norm  $[f]_{\mathcal{B}}$ .

Thus, beyond knowing that  $f_n$  asymptotically fits the function  $f^*$  perfectly at known data, Theorem 2.1 provides information about how it may interpolate at points where  $\mu$  has no information. Such knowledge is of interest when a population may naturally evolve in time (distributional shift) or if  $f_n$  is applied to a new problem with similar features but distinct geometry (transfer learning).

An analogous statement holds with a simpler proof for a fixed data-set  $S$  of  $n$  data points if  $\lambda$  is coupled to  $m$  such that  $\frac{1}{m\lambda_m} \rightarrow 0$ . In this case, we take the empirical distribution  $\mu = \frac{1}{n} \sum_{x \in S} \delta_x$  as the population and do not need to bound the generalization gap. This model can be considered appropriate when  $n \ll m$  (heavy overparametrization). A precise statement is given in Appendix F.

The proof of Theorem 2.1 is given in Appendix E. It remains valid if we only assume that  $\lim_{n \rightarrow \infty} \hat{\mathcal{R}}_{n,m_n,\lambda_n}(a_n, W_n, b_n) = 0$ , i.e. if  $(a, W, b)_n$  parametrizes a function of low excess risk. In the proof, we obtain a more precise version of (2). By interpolation using an a priori Lipschitz-bound, convergence at a given rate can be obtained in  $L^p(\mu)$ . For uniform convergence on compact sets outside the support of  $\mu$ , we do not obtain a rate in this work.

All results can easily be generalized to any more general function class which admits the three key ingredients: A bound on its Rademacher complexity, a compact embedding theorem, and a direct approximation theorem.

### 3 Minimum norm interpolants

#### 3.1 One-dimensional example

In one dimension, [Wojtowytsch, 2022, Proposition 2.5] shows that  $[f]_{\mathcal{B}} = \int_{-\infty}^{\infty} |f''(x)| dx$  for any smooth function  $f : \mathbb{R} \rightarrow \mathbb{R}$  which satisfies  $f'(x) = 0$  at some point  $x \in \mathbb{R}$  – see also previous work by Li et al. [2020], E and Wojtowytsch [2020]. This one-dimensional case is, in fact, the simplest case of a general characterization of Barron functions in any dimension by Ongie et al. [2019].

Consider the task of minimizing  $[f]_{\mathcal{B}}$  under the condition that  $f(x) = |x|$  if  $|x| \geq 1$ . Then the minimum is attained for any smooth convex function  $f$  which satisfies the constraint since

$$2 = f'(1) - f'(-1) = \int_{-1}^1 f''(x) dx \leq \int_{-1}^1 |f''(x)| dx = [f]_{\mathcal{B}}$$

with equality if and only if  $f'' \geq 0$ . The same estimate holds for non-smooth Barron functions if the second derivative is interpreted as a Radon measure. For piecewise linear functions, this corresponds to summing  $|f'(x_i^+) - f'(x_i^-)|$  over the non-smooth points  $x_i$ . More generally, the set of minimum norm interpolants of one-dimensional convex data is characterized as follows.

**Proposition 3.1.** *Let  $x_0 < \dots < x_n$  and  $y_i = f^*(x_i)$  for a convex function  $f^*$  and  $i = 0, \dots, n$ . If  $y_1 < y_0$  and  $y_n > y_{n-1}$ , then  $f$  is a minimum Barron norm interpolant of the dataset  $\{(x_i, y_i)\}_{i=0}^n$  if and only if  $f$  is convex,  $f(x_i) = y_i$  for all  $i = 0, \dots, n$  and*

$$f'(x) = \frac{y_1 - y_0}{x_1 - x_0} \quad \text{for } x < x_1 \quad \text{and} \quad f'(x) = \frac{y_n - y_{n-1}}{x_n - x_{n-1}} \quad \text{for } x > x_{n-1}.$$

The two given slopes are the largest values that are required for derivatives at any point. We give a proof of Proposition 3.1 in Appendix G. In full generality, minimum norm solutions have been characterized by Hanin [2021] using matching convexities to achieve minimal total curvature.

#### 3.2 Radially symmetric bump function

Another setting where we have explicit minimum norm interpolant is when we fit a bump function for radially symmetric data. Recall a result of Wojtowytsch [2022] on minimum norm fitting of certain radially symmetric data.

**Proposition 3.2.** [Wojtowytsch, 2022, Theorem 3.1] *Let  $d \geq 3$  be an odd integer and*

$$\mathcal{F} = \{f \in C_c(\mathbb{R}^d) : f(0) = 1 \text{ and } f(x) = 0 \text{ if } \|x\| \geq 1\}.$$

*Then there exists a unique radially symmetric function  $f_d^* : \mathbb{R}^d \rightarrow \mathbb{R}$  such that  $f_d^* \in \operatorname{argmin}_{f \in \mathcal{F}} [f]_{\mathcal{B}}$ . The norm of minimizers grows as  $\lim_{d \rightarrow \infty} [f_d^*]_{\mathcal{B}}/d \approx 3.7$ .*

We note that the existence of minimum norm interpolants which are not radially symmetric is not excluded, but if  $\hat{f} \in \operatorname{argmin}_{f \in \mathcal{F}} [f]_{\mathcal{B}}$  is any other minimum norm interpolant, then its radial average  $\operatorname{Av} \hat{f}$  coincides with  $f_d^*$ .  $\operatorname{Av} \hat{f} \equiv f_d^*$ . Here

$$\operatorname{Av} f(x) := \int_{SO(d)} f(Ox) dH_O = \int_{S^{d-1}} f(|x| \cdot \nu) d\pi_\nu^0 \quad (3)$$

where  $H$  is the uniform distribution (Haar measure) on the group of rotations and  $\pi^0$  is the uniform distribution on the  $d-1$ -dimensional sphere in  $\mathbb{R}^d$ . In [Wojtowytsch, 2022, Section 6], an algorithm is given to find the minimum norm interpolant  $f_d^*$  by numerically solving a one-dimensional polynomial approximation problem and a linear system of moment conditions.

The uniqueness statement allows us to strengthen the result of Theorem 2.1 in this case. A natural setting is to use a sub-Gaussian data distribution  $\mu$  which gives positive mass to the origin, but has no mass elsewhere in the unit ball. It should have mass everywhere outside the unit ball. Under this natural setting, we have a stronger result of Theorem 2.1.

**Theorem 3.3.** *Take  $\mu, S_n, \hat{\mathcal{R}}_{n,m,\lambda}$  as in Section 1.2, and assume in addition that*

1.  $\mu(\{0\}) > 0$  (positive mass at the origin).

- 156 2.  $\mu(B_1(0) \setminus \{0\}) = 0$  (no mass elsewhere in the unit ball).  
 157 3.  $\mu(U) > 0$  for any open set  $U \subseteq \mathbb{R}^d \setminus \overline{B_1(0)}$  (mass everywhere outside the unit ball).

158 Assume that  $m, \lambda$  scale with  $n$  as in (1). Almost surely over the random selection of data points in  
 159  $S_n$ , the following holds: If  $(a, W, b)_n \in \operatorname{argmin} \widehat{\mathcal{R}}_{n, m_n, \lambda_n}$  for all  $n \in \mathbb{N}$ , then sequence of radial  
 160 averages  $\operatorname{Av} f_n$  of  $f_n := f_{(a, W, b)_n}$  converges to  $f_d^*$  as in Proposition 3.2. Convergence holds in  
 161  $L^2(\mu)$  for MSE loss (with an explicit rate) and uniformly on compact subsets of  $\mathbb{R}^d$  (without a rate in  
 162 this work).

163 In Theorem 3.3, we guarantee convergence to the unique radial minimum norm interpolant  $f_d^*$  (at  
 164 least for the radial average), while in Theorem 2.1 we may have different subsequences that converge  
 165 to different minimum norm interpolants. The proof is given in Appendix E.

## 166 4 Relating Interpolation, Optimization and Generalization

167 For a given bounded set  $K \subseteq \mathbb{R}^d$ , Theorem 2.1 states that for a large number of neurons  $m \in \mathbb{N}$ ,  
 168 a large number of data points  $n \in \mathbb{N}$ , and a small penalty  $\lambda > 0$ , minimizers of the empirical risk  
 169 functional  $\widehat{\mathcal{R}}_{n, m, \lambda}$  resemble a minimum norm interpolant everywhere in  $K$ . As the Barron semi-norm  
 170 controls the generalization gap (see Appendix D) and a minimum norm interpolant has minimal  
 171 Barron norm by definition, this suggests that minimum norm interpolants are optimal in terms of  
 172 generalization, at least when arguing from this upper bound.

173 Many authors, including Safran and Shamir [2018b], Venturi et al. [2018], demonstrate that neural  
 174 network training is a non-convex optimization problem. As such, it is not guaranteed that numerical  
 175 optimizers (1) converge to interpolants at all, and (2) select minimum norm interpolants out of the  
 176 large set of different neural networks which interpolate given data, even when a regularizer is included  
 177 in the training loss functional.

178 On the other hand, there are settings where an optimization algorithm selects a minimum norm  
 179 solution even without explicit regularization. This is easily proved for gradient descent on the  
 180 overparametrized least squares regression problem  $\mathcal{R}_n(a) = \frac{1}{n} \sum_{i=1}^n |a^T x_i - y_i|^2$  with initial  
 181 condition  $a = 0$  and  $n < m = d$ . Using entirely different methods, Chizat and Bach [2020] prove a  
 182 similar result for binary classification by shallow neural networks with logistic loss. For regression  
 183 problems using neural networks, analogous results are not available to the best of our knowledge.  
 184 This in part motivates the following numerical investigation. Namely, we are interested in exploring  
 185 the effects of explicit regularization and the implicit bias of optimization algorithms toward minimum  
 186 norm interpolants. Knowing the analytically optimal solution in between given data provides us the  
 187 opportunity to compare optimizers on a deeper level than merely testing their performance on unseen  
 188 data generated from the same distribution.

189 As seen in Figure 1, the radial profile  $r \mapsto f_d^*(re_1)$  of Wojtowytsch [2022]’s minimum norm  
 190 interpolant  $f_d^*$  is so close to 0 on  $[r_d, \infty)$  as to be virtually indistinguishable from zero numerically  
 191 for some  $r_d < 1$  which decreases in  $d$ . Indeed, the first  $(d-1)/2$  derivatives of vanish at  $r = 1$   
 192 due to [Wojtowytsch, 2022, Lemma 4.1] and  $0 \leq f_d^*(x) \leq Cd^{3/2}((1 - \|x\|^2)/\|x\|)^{(d-3)/2}$  due  
 193 to [Wojtowytsch, 2022, Appendix D.1] for a universal constant  $C > 0$ . In particular, if  $d$  is large,  
 194  $\|f_d^*\|_{L^\infty(\mathbb{R}^d \setminus B_{r_d}(0))}$  is negligible compared to the approximation error  $d^2/m$  for any reasonable  
 195 dimension  $d$  and network width  $m$ . Consequently, the rescaled function  $h_d^*(x) := f_d^*(r_d x)$  meets  
 196 the constraint  $h_d^* \equiv 0$  outside  $B_1(0)$  almost exactly and has the smaller Barron semi-norm  $[h_d^*]_{\mathcal{B}} =$   
 197  $r_d [f_d^*]_{\mathcal{B}}$ . For this reason, we compare numerical solutions to the interpolation problem in Theorem  
 198 3.3 to rescaled versions of  $f_d^*$  rather than  $f_d^*$  itself, at least in high dimension. For  $r$  below the  
 199 threshold value  $r_d$ , there is no noticable trade-off between rescaling  $f_d^*(rx)$  and data-fitting. For  
 200 larger values of  $r$ , the Barron semi-norm is reduced more significantly, but the data fit becomes  
 201 appreciably worse.

## 202 5 Numerical Experiments

203 Our main goal in this section is to gain a more precise understanding of different optimization  
 204 algorithms by comparing numerical solutions to a known minimum norm interpolant. We consider

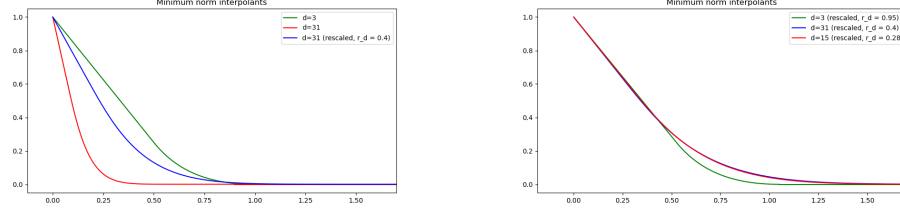

Figure 1: **Left:** In Dimension  $d = 31$ , the minimum Barron norm solution  $f_d^*$  satisfies  $f_d^* \equiv 0$  on  $\mathbb{R}^d \setminus B_{r_d}(0)$  for  $r_d = 0.4$  to high precision, albeit not exactly. The rescaled function  $f_d^*(r_d x)$  is a suitable candidate for a minimum norm almost-interpolant to high accuracy. **Right:** For later use, we consider more aggressively rescaled functions  $f_d^*(r_d x)$  for  $d = 15, d = 31$  with lower semi-norm, but worse data fitting properties. We note that the rescalings of these functions which have essentially the same slope as  $f_3^*$  at  $r = 0$  appear to coincide. We conjecture that this statement allows for a more rigorous formulation.

the two settings in which minimum norm interpolation by Barron functions is best understood: One-dimensional and radially symmetric functions. As a benefit, we can easily visualize the numerical results in both settings. We focus on three questions of interest.

1. **Explicit regularization.** If  $\lambda > 0$  is moderately small and  $m, n$  are large, then a global minimizer of  $\hat{\mathcal{R}}_{n,m,\lambda}$  resembles a minimum norm interpolant between known data points due to Theorem 2.1. Is the minimizer which we find numerically close to to a minimum norm interpolant, or does it merely fit the function at known data points?
2. **Implicit bias.** If  $m, n$  are large, does a training algorithm select a minimum norm interpolant out of potentially many possible solutions without explicit regularization (i.e. for  $\lambda = 0$ )?
3. **Learning symmetries:** The optimal minimum norm interpolant  $f_d^*$  described in Proposition 3.2 is radially symmetric and satisfies  $0 \leq f_d^* \leq 1$ . Proposition 3.2 does not rule out the existence of other minimum norm interpolants which are not radially symmetric. Does an optimization algorithm generally find solutions which are (approximately) radially symmetric and confined to the interval  $[0, 1]$ ? A similar consideration applies in a one-dimensional investigation with reflection symmetry.

The third question is of particular interest for algorithms like ADAM, which operate coordinate-by-coordinate and do not respect Euclidean isometries. By comparison, we expect that SGD, initialized at a radially symmetric configuration, preserves Euclidean isometries. More experiments in similar settings can be found in Appendix A.

## 5.1 One-dimensional experiments

We consider the classical interpolation problem of numerical analysis: Fit values  $f^*(x_i) \in \mathbb{R}$  at points  $x_i \in \mathbb{R}$  for  $i \in \{1, \dots, n\}$ . In contrast to classical numerical analysis, we consider overparametrized ReLU-networks with a single hidden layer as our model class. As in Section 3, we select  $f^*(x) = |x|$  for simplicity.

In Figure 2, a ReLU network with a single hidden layer of width  $m = 200$  was trained to fit  $f^*(x) = |x|$  at a symmetric set containing 15 equi-spaced points in  $(1, 2)$ . Optimizers included SGD (with learning rate  $\eta = 5 \cdot 10^{-5}$  and momentum  $\mu = 0.99$ ), SGD ( $\eta = 10^{-2}$ ,  $\mu = 0$ ), ADAM ( $\eta = 5 \cdot 10^{-5}$  and default parameters) and the quasi-Newton L-BFGS method. Deterministic gradients based on the  $n = 30$  sample points were used. The final training loss was below  $10^{-4}$  on average. The network weights were initialized by a scaled uniform Xavier initialization, i.e. uniformly in a symmetric interval of length  $2\alpha \cdot \sqrt{6/(n_{in} + n_{out})}$  where  $n_{in}$  and  $n_{out}$  denote the number of input- and output-units to a layer respectively. The ‘gain’ factor was selected as  $\alpha \in \{0.5, 1, 5\}$ . Without weight decay and for small gain, the optimizers find a solution close to the smallest possible minimum norm interpolant  $f(x) = |x|$ . The larger the parameters for initialization gain and weight decay penalty, the closer numerical solutions are to the largest possible minimum norm interpolant  $f(x) = \max\{|x|, 1\}$ .

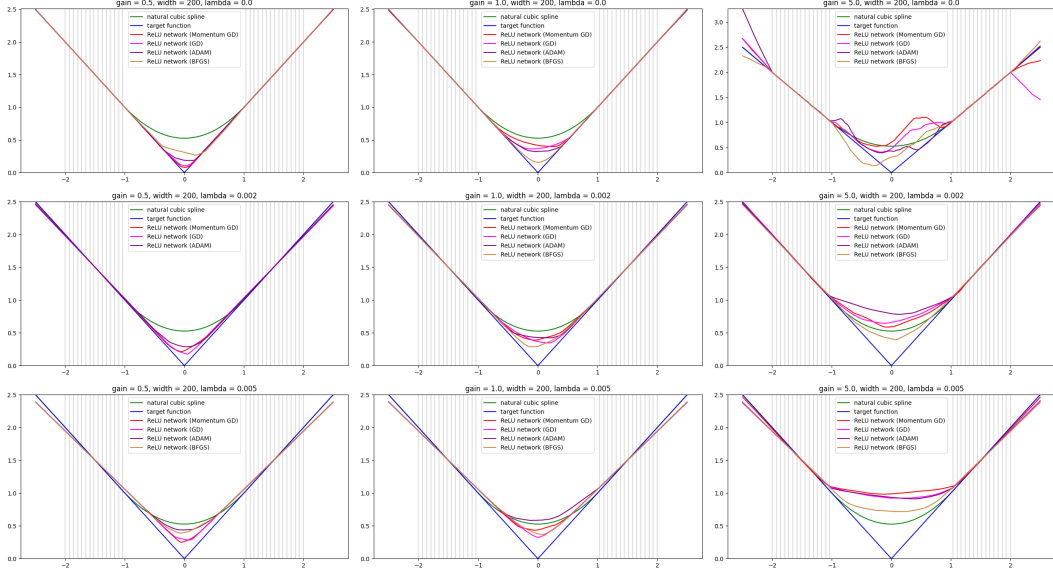

Figure 2: We compare numerical approximations of a target function for Momentum-GD (red), GD (magenta), ADAM (purple) and L-BFGS (brown). The target function is drawn in blue and the natural cubic spline in green. For each algorithm, we plot one representative solution to study symmetry selection properties. Vertical grey lines indicate known training data points. The initialization has gain  $\alpha \in \{0.5, 1.0, 5.0\}$  in the left, middle and right column. The weight decay penalty is  $\lambda \in \{0, 0.002, 0.005\}$  (top, middle, bottom row). For all optimization algorithms, the final loss is approximately  $0, 2 \cdot 10^{-4}$  and  $10^{-3}$  respectively.

For small gain, the optimizer selects a minimum norm interpolant/convex function. For large gain, the interpolant is often non-convex for any one of the optimization algorithms, unless the weight decay is given a positive value. A specific type of minimum norm interpolant in the large set of possible solutions seems to be selected by specifying optimization algorithm, weight decay and initialization. Evidently, initialization and weight decay have far greater influence than the choice of the optimizer. With larger weight decay, the solutions become more convex and more symmetric, but the accuracy of data fitting decreases. Visually, the second order L-BFGS method appears to be the least affected by different choices in initialization.

241 We observe that a higher gain factor  $\alpha$  corresponds to faster initial training, but a high gain like  
 242  $\alpha = 5$  produces interpolants which are non-convex without regularization, while a lower gain factor  
 243 produces convex interpolants in longer time. This observation agrees with the findings of Chizat  
 244 et al. [2019], who dub the large  $\alpha$  setting the ‘lazy training’ regime and associate it with worse  
 245 generalization performance. As Pesme et al. [2021] eloquently put it: “there is a tension between  
 246 generalisation and optimisation: a longer training time might improve generalisation but comes at the  
 247 cost of... a longer training time.”

248 If  $m$  is large and  $\alpha$  is not too big, the variation of solutions produced by a training algorithm vary  
 249 less over different stochastic realizations – see Appendix A for experiments for  $m = 1,000$ . The  
 250 dynamics are close to those of a limiting ‘mean field’ model studied by Chizat and Bach [2018],  
 251 Rotskoff and Vanden-Eijnden [2018], Mei et al. [2018], Sirignano and Spiliopoulos [2020a] and  
 252 Wojtowytsch [2020]. In these works, the limiting model is typically derived with a factor  $1/m$  outside  
 253 the function definition, which is implicit in the initialization here since  $n_{in} + n_{out} \approx m$  for both  
 254 layers and the ReLU activation is positively one-homogeneous. Global convergence to a minimizer  
 255 (but not necessarily a minimum norm solution) is guaranteed (up to certain technical assumptions) by  
 256 Chizat and Bach [2018] and Wojtowytsch [2020].

257 For comparison, we also present the natural cubic spline interpolant, i.e. the function  $f$  which  
 258 minimizes the stronger curvature energy  $\int_{-2}^2 |f''(x)|^2 dx$  under the condition that  $f(x_i) = |x_i|$  for  
 259 all  $i = 1, \dots, n$ . Unlike the minimum Barron norm interpolants, the natural cubic spline may not be  
 260 convex (and in fact, it is not if  $f^*$  is replaced by  $h^*(x) = |x - 0.5|$ ).

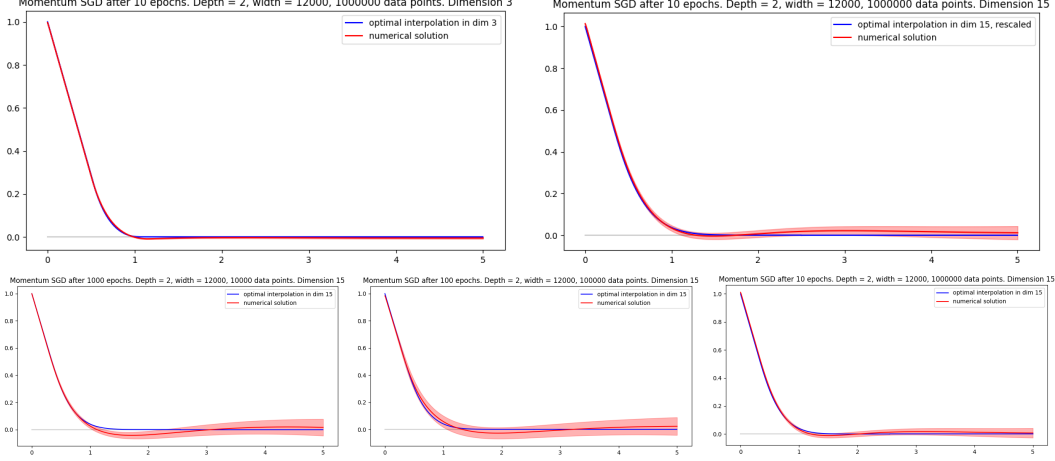

Figure 3: A neural network with a single hidden layer of width  $m = 12,000$  was trained by gradient descent with learning rate  $\eta = 10^{-3}$  and momentum  $\mu = 0.99$  in the setting of Section 5.2. The radial average is sketched by a solid red line. One radial standard deviation around the average, computed over 500 random directions, is shaded. **Top row:** Experiment in dimension 3 (left) and dimension 15 (right). The numerical solutions are compared to  $f_d^*(r_d x)$  with  $r_3 = 1/1.05$  and  $r_{15} = 1/2.55$ . In both cases, the ‘minimum norm interpolant’ shape is attained to high accuracy. Both solutions are approximately symmetric, more so in low dimension. **Bottom row:** Numerical approximations to  $f_{15}^*(r_{15} \cdot)$  for neural networks of constant width  $m = 12,000$ , trained on data sets of different size (but for an identical number of 200,000 training steps with stochastic estimates computed over a batch of 50 data points). The shape of the radial average is comparable across different dataset sizes, but the fit of the radial average with data is improved and the radial variance reduced for larger datasets. Note that the first two simulations are set in the overparametrized regime, whereas the last experiment on the largest dataset is underparametrized.

## 261 5.2 Radially symmetric data

262 We explore the performance of numerical optimization algorithms in the setting of Theorem 3.3 with  
 263 and without explicit regularization  $\lambda \in \{0, 10^{-5}\}$  in dimensions  $d = 3$ ,  $d = 15$  and  $d = 31$ . The  
 264 numerical solution is then compared to (a rescaled version of) the analytic minimum norm interpolant  
 265  $f_d^*$  described in Proposition 3.2, which we compute by the algorithm described in [Wojtowysch,  
 266 2022, Section 6]. The rescaling factor  $r_d$  is chosen heuristically for an accurate match.

267 Data is generated from a distribution  $\mu = \mu_1 + \mu_2 + \mu_3$  where  $\mu_1$  is a point mass of magnitude  $m_1$   
 268 at the origin,  $\mu_2$  is a uniform measure on the unit sphere  $S^{d-1}$  with mass  $m_2$  and  $\mu_3$  is the radially  
 269 symmetric measure of mass  $1 - m_1 - m_2$  such that  $\|x\|_2$  is distributed uniformly in  $[1, 7]$ . We  
 270 numerically explored various values for  $m_1 \in [0.1, 0.4]$  and  $m_2 \in [0.0, 0.4]$  and found simulations  
 271 to be relatively stable under a number of choices.

272 Results are presented in Figures 3, 4 and Appendix A. We find that all algorithms find a solution with  
 273 radial average similar to  $f_d^*(r_d x)$ , albeit for rescaling factors  $r_d$  which depend on dimension  $d$  and  
 274 (to a lesser extent) the optimizer. In high dimension, solutions are not perfectly radially symmetric,  
 275 but the larger amount of variation over a sphere of fixed radius is observed in the domain where  
 276  $f_d^* \approx 0$  rather than in the transition area  $(0, r_d)$ . Larger datasets improve the compliance with the  
 277 optimal interface and reduce the radial standard deviation. Solutions do not remain non-negative and  
 278 drop below zero before leveling off as the radius increases. The drop becomes more noticeable as the  
 279 dimension increases and less pronounced for wider networks.

280 The results are essentially identical for normal Xavier initialization and (not radially symmetric)  
 281 uniform Xavier initialization. In accordance with our expectations, the radial standard deviation is  
 282 higher for Adam compared to optimizers based in Euclidean geometry. While the neural network  
 283 function found by Adam resembles a minimum norm interpolant, the weight decay regularizer takes  
 284 significantly higher values compared to other optimization algorithms.



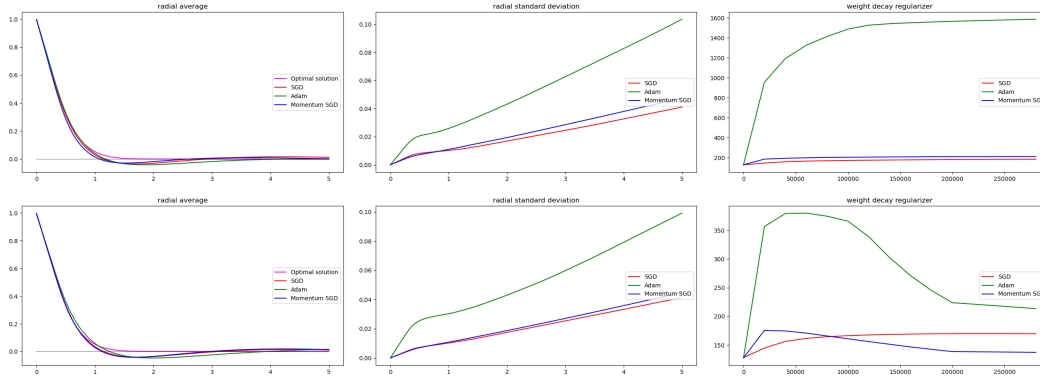

Figure 4: **Top line:** We compare different optimizers (SGD, Adam and Momentum-SGD) in the setting of Section 5.2 in dimension 31. All minimizers attain the minimum norm interpolant shape (left column) – curiously for Adam, the correct shape is attained despite the fact that the weight decay regularizer is an order of magnitude higher than for the other optimizers (right column). The high regularizer value goes hand in hand with a higher radial standard deviation (middle column). The initialization is uniform Xavier (in particular, not radially symmetric). Essentially identical results are observed for the radially symmetric normal Xavier initialization with the same degree of radial symmetry in Figure 8. **Bottom line:** If we include an explicit weight-decay regularizer with weight  $\lambda = 10^{-5}$ , solutions resemble an optimal interpolant for a smaller rescaling factor  $r_{31,\lambda} = 1/3.8$  compared to  $r_{31} = 1/3.5$  without regularization. This is expected since the norm is weighted more heavily compared to data compliance. Notably, the radial standard deviation does not decrease, even for the (heavily affected) ADAM optimizer.

## 6 Conclusion

Shallow ReLU networks converge to minimum norm interpolants of given data: Provably if explicit regularization is included and empirically if it is not. We conclude with a summary of our empirical insight into the implicit bias of neural network optimizers.

1. With reasonable (not too large) initialization, all algorithms studied here are biased towards minimum norm interpolant profiles.
2. At least in the case of Adam, this bias is visible on the function level, but not on the parameter level, as the weight decay regularizer increases rapidly to large magnitude. Despite this, ADAM solutions often appear ‘flatter’ in high dimension with a lower rescaling factor  $r_d$ .
3. Explicit regularization stabilizes towards a minimum norm interpolant shape, but at the cost of a decreased fit with the target values. Its impact is most significant for poorly chosen initial conditions.
4. When the minimum norm interpolant is non-unique, different types of minimum norm interpolants are found depending on the choice of initialization scheme and optimization algorithm. The impact of initialization scale appears more significant.
5. Optimization algorithms which are rooted in Euclidean geometry (such as SGD and momentum-SGD) more successfully preserve Euclidean symmetries compared to the ‘coordinate-wise’ Adam algorithm.

The last observation is not surprising for radially symmetric initialization laws as radially symmetric parameter distributions induce radially symmetric functions. It is, however, observed also for a uniform initialization scheme which only obeys coordinate symmetries.

We believe minimum norm interpolation to be a useful testbed to study the implicit bias of optimizers and the impact of initialization and regularization. While minimum norm interpolation by deeper networks has not been characterized yet, we anticipate no obstructions to implementing a similar program there in the future.

## References

- Stefan Adams. Lecture notes in high-dimensional probability. [https://warwick.ac.uk/fac/sci/math/people/staff/stefan\\_adams/high-dimensional\\_probability\\_ma3k0-notes.pdf](https://warwick.ac.uk/fac/sci/math/people/staff/stefan_adams/high-dimensional_probability_ma3k0-notes.pdf), 2022.
- Nicholas D. Alikakos, Peter W. Bates, and Xinfu Chen. Convergence of the Cahn-Hilliard equation to the Hele-Shaw model. *Arch. Rational Mech. Anal.*, 128(2):165–205, 1994. ISSN 0003-9527. doi: 10.1007/BF00375025. URL <http://dx.doi.org/10.1007/BF00375025>.
- Annika Bach, Roberta Marziani, and Caterina Ida Zeppieri.  $\gamma$ -convergence and stochastic homogenisation of singularly-perturbed elliptic functionals. *arXiv preprint arXiv:2102.09872*, 2021.
- Francis Bach. Breaking the curse of dimensionality with convex neural networks. *The Journal of Machine Learning Research*, 18(1):629–681, 2017.
- Heinz Bauer. Minimalstellen von funktionen und extremalpunkte. *Archiv der Mathematik*, 9(4):389–393, 1958.
- Mikhail Belkin, Daniel Hsu, Siyuan Ma, and Soumik Mandal. Reconciling modern machine-learning practice and the classical bias–variance trade-off. *Proceedings of the National Academy of Sciences*, 116(32):15849–15854, 2019.
- Mikhail Belkin, Daniel Hsu, and Ji Xu. Two models of double descent for weak features. *SIAM Journal on Mathematics of Data Science*, 2(4):1167–1180, 2020.
- Kaushik Bhattacharya, Marta Lewicka, and Mathias Schäffner. Plates with incompatible prestrain. *Archive for Rational Mechanics and Analysis*, 221(1):143–181, 2016.
- Andrea Braides.  $\Gamma$ -convergence for beginners, volume 22 of *Oxford Lecture Series in Mathematics and its Applications*. Oxford University Press, Oxford, 2002. ISBN 0-19-850784-4. doi: 10.1093/acprof:oso/9780198507840.001.0001. URL <http://dx.doi.org/10.1093/acprof:oso/9780198507840.001.0001>.
- Andrea Braides and Lev Truskinovsky. Asymptotic expansions by  $\gamma$ -convergence. *Continuum Mechanics and Thermodynamics*, 20:21–62, 2008.
- Lia Bronsard and Robert V. Kohn. On the slowness of phase boundary motion in one space dimension. *Comm. Pure Appl. Math.*, 43(8):983–997, 1990. ISSN 0010-3640. doi: 10.1002/cpa.3160430804. URL <http://dx.doi.org/10.1002/cpa.3160430804>.
- Andrei Caragea, Philipp Petersen, and Felix Voigtlaender. Neural network approximation and estimation of classifiers with classification boundary in a barron class. *arXiv preprint arXiv:2011.09363*, 2020.
- Lenaïc Chizat and Francis Bach. On the global convergence of gradient descent for over-parameterized models using optimal transport. *Advances in neural information processing systems*, 31, 2018.
- Lenaïc Chizat and Francis Bach. Implicit bias of gradient descent for wide two-layer neural networks trained with the logistic loss. In *Conference on Learning Theory*, pages 1305–1338. PMLR, 2020.
- Lenaïc Chizat, Edouard Oyallon, and Francis Bach. On lazy training in differentiable programming. *Advances in Neural Information Processing Systems*, 32, 2019.
- Yaim Cooper. The loss landscape of overparameterized neural networks. *arXiv preprint arXiv:1804.10200*, 2018.
- Gianni Dal Maso. *An introduction to  $\Gamma$ -convergence*, volume 8. Springer Science & Business Media, 2012.
- Alex Damian, Tengyu Ma, and Jason D Lee. Label noise sgd provably prefers flat global minimizers. *Advances in Neural Information Processing Systems*, 34:27449–27461, 2021.
- Ennio De Giorgi and Tullio Franzoni. Su un tipo di convergenza variazionale. *Atti della Accademia Nazionale dei Lincei. Classe di Scienze Fisiche, Matematiche e Naturali. Rendiconti*, 58(6):842–850, 1975.

357 Manfred Dobrowolski. *Angewandte Funktionalanalysis: Funktionalanalysis, Sobolev-Räume und*  
358 *Elliptische Differentialgleichungen*. Springer-Verlag, 2010.

359 Patrick W Dondl, Matthias W Kurzke, and Stephan Wojtowytsch. The effect of forest dislocations on  
360 the evolution of a phase-field model for plastic slip. *Archive for Rational Mechanics and Analysis*,  
361 232(1):65–119, 2019.

362 Simon S Du, Xiyu Zhai, Barnabas Poczos, and Aarti Singh. Gradient descent provably optimizes  
363 over-parameterized neural networks. *arXiv preprint arXiv:1810.02054*, 2018.

364 Weinan E and Stephan Wojtowytsch. Representation formulas and pointwise properties for Barron  
365 functions. *Calc. Var. Partial Differential Equations*, 61(46), 2020.

366 Weinan E and Stephan Wojtowytsch. Kolmogorov width decay and poor approximators in machine  
367 learning: Shallow neural networks, random feature models and neural tangent kernels. *Research in*  
368 *the Mathematical Sciences*, 8(1):1–28, 2021.

369 Weinan E and Stephan Wojtowytsch. On the emergence of simplex symmetry in the final and  
370 penultimate layers of neural network classifiers. In *Mathematical and Scientific Machine Learning*,  
371 pages 270–290. PMLR, 2022.

372 Weinan E, Chao Ma, and Lei Wu. A priori estimates of the population risk for two-layer neural  
373 networks. *Communications in Mathematical Sciences*, 17(5):1407–1425, 2019a. doi: 10.4310/  
374 cms.2019.v17.n5.a11. URL <https://doi.org/10.4310%2Fcms.2019.v17.n5.a11>.

375 Weinan E, Chao Ma, and Lei Wu. A comparative analysis of optimization and generalization  
376 properties of two-layer neural network and random feature models under gradient descent dynamics.  
377 *Sci. China Math*, 2019b.

378 Weinan E, Chao Ma, and Lei Wu. The barron space and the flow-induced function spaces for neural  
379 network models. *arXiv:1906.08039 [cs.LG]*, 2019c.

380 Lawrence Craig Evans and Ronald F Gariepy. *Measure theory and fine properties of functions*. CRC  
381 press, 2015.

382 Gero Friesecke, Richard D James, and Stefan Müller. Rigorous derivation of nonlinear plate theory  
383 and geometric rigidity. *Comptes Rendus Mathématique*, 334(2):173–178, 2002a.

384 Gero Friesecke, Richard D James, and Stefan Müller. A theorem on geometric rigidity and the  
385 derivation of nonlinear plate theory from three-dimensional elasticity. *Communications on Pure*  
386 *and Applied Mathematics*, 55(11):1461–1506, 2002b.

387 Gero Friesecke, Richard D James, Maria Giovanna Mora, and Stefan Müller. Derivation of nonlinear  
388 bending theory for shells from three-dimensional nonlinear elasticity by gamma-convergence.  
389 *Comptes Rendus Mathématique*, 336(8):697–702, 2003.

390 Xavier Glorot and Yoshua Bengio. Understanding the difficulty of training deep feedforward neural  
391 networks. In *Proceedings of the thirteenth international conference on artificial intelligence and*  
392 *statistics*, pages 249–256. JMLR Workshop and Conference Proceedings, 2010.

393 Boris Hanin. Ridgeless interpolation with shallow relu networks in  $1d$  is nearest neighbor curvature  
394 extrapolation and provably generalizes on lipschitz functions. *arXiv preprint arXiv:2109.12960*,  
395 2021.

396 Boris Hanin and David Rolnick. How to start training: The effect of initialization and architecture.  
397 *Advances in Neural Information Processing Systems*, 31, 2018.

398 Kaiming He, Xiangyu Zhang, Shaoqing Ren, and Jian Sun. Delving deep into rectifiers: Surpassing  
399 human-level performance on imagenet classification. In *Proceedings of the IEEE international*  
400 *conference on computer vision*, pages 1026–1034, 2015.

401 Sepp Hochreiter and Jürgen Schmidhuber. Flat minima. *Neural computation*, 9(1):1–42, 1997.

402 Jean Honorio and Tommi Jaakkola. Tight Bounds for the Expected Risk of Linear Classifiers and  
403 PAC-Bayes Finite-Sample Guarantees. In Samuel Kaski and Jukka Corander, editors, *Proceedings*  
404 *of the Seventeenth International Conference on Artificial Intelligence and Statistics*, volume 33 of  
405 *Proceedings of Machine Learning Research*, pages 384–392, Reykjavik, Iceland, 22–25 Apr 2014.  
406 PMLR. URL <https://proceedings.mlr.press/v33/honorio14.html>.

407 Tom Ilmanen. Convergence of the Allen-Cahn equation to Brakke’s motion by mean curvature. *J.*  
408 *Differential Geom.*, 38(2):417–461, 1993. ISSN 0022-040X. URL [http://projecteuclid.](http://projecteuclid.org/euclid.jdg/1214454300)  
409 [org/euclid.jdg/1214454300](http://projecteuclid.org/euclid.jdg/1214454300).

410 Diederik P Kingma and Jimmy Ba. Adam: A method for stochastic optimization. *arXiv preprint*  
411 *arXiv:1412.6980*, 2014.

412 Achim Klenke. *Wahrscheinlichkeitstheorie*, volume 1. Springer, 2006.

413 Marta Lewicka, Maria Giovanna Mora, and Mohammad Reza Pakzad. Shell theories arising as low  
414 energy  $\gamma$ -limit of 3d nonlinear elasticity. *Annali della Scuola Normale Superiore di Pisa-Classe di*  
415 *Scienze*, 9(2):253–295, 2010.

416 Zhiyuan Li, Tianhao Wang, and Sanjeev Arora. What happens after sgd reaches zero loss?—a  
417 mathematical framework. *arXiv preprint arXiv:2110.06914*, 2021.

418 Zhong Li, Chao Ma, and Lei Wu. Complexity measures for neural networks with general activation  
419 functions using path-based norms. *arXiv preprint arXiv:2009.06132*, 2020.

420 Marco Loog, Tom Viering, Alexander Mey, Jesse H Krijthe, and David MJ Tax. A brief prehistory of  
421 double descent. *Proceedings of the National Academy of Sciences*, 117(20):10625–10626, 2020.

422 Chao Ma, Lei Wu, et al. Machine learning from a continuous viewpoint, i. *Science China Mathematics*,  
423 63(11):2233–2266, 2020.

424 Song Mei, Andrea Montanari, and Phan-Minh Nguyen. A mean field view of the landscape of two-  
425 layer neural networks. *Proceedings of the National Academy of Sciences*, 115(33):E7665–E7671,  
426 2018.

427 Luciano Modica. The gradient theory of phase transitions and the minimal interface criterion. *Arch*  
428 *Ration Mech Anal*, 98(2):123–142, 1987.

429 Luciano Modica and Stefano Mortola. Un esempio di  $\Gamma$ -convergenza. *Boll. Un. Mat. Ital. B (5)*, 14  
430 (1):285–299, 1977.

431 Luca Mugnai and Matthias Röger. Convergence of perturbed Allen-Cahn equations to forced mean  
432 curvature flow. *Indiana Univ. Math. J.*, 60(1):41–75, 2011. ISSN 0022-2518. doi: 10.1512/iumj.  
433 2011.60.3949. URL <http://dx.doi.org/10.1512/iumj.2011.60.3949>.

434 Greg Ongie and Rebecca Willett. The role of linear layers in nonlinear interpolating networks. *arXiv*  
435 *preprint arXiv:2202.00856*, 2022.

436 Greg Ongie, Rebecca Willett, Daniel Soudry, and Nathan Srebro. A function space view of bounded  
437 norm infinite width relu nets: The multivariate case. *arXiv preprint arXiv:1910.01635*, 2019.

438 Rahul Parhi and Robert D Nowak. Banach space representer theorems for neural networks and ridge  
439 splines. *J. Mach. Learn. Res.*, 22(43):1–40, 2021.

440 Rahul Parhi and Robert D Nowak. What kinds of functions do deep neural networks learn? insights  
441 from variational spline theory. *SIAM Journal on Mathematics of Data Science*, 4(2):464–489,  
442 2022.

443 Scott Pesme, Loucas Pillaud-Vivien, and Nicolas Flammarion. Implicit bias of sgd for diagonal linear  
444 networks: a provable benefit of stochasticity. *Advances in Neural Information Processing Systems*,  
445 34:29218–29230, 2021.

446 Grant M Rotskoff and Eric Vanden-Eijnden. Neural networks as interacting particle systems:  
447 Asymptotic convexity of the loss landscape and universal scaling of the approximation error. *stat*,  
448 1050:22, 2018.

449 W. Rudin. *Functional Analysis*. International series in pure and applied mathematics. McGraw-Hill,  
450 1991. ISBN 9780070542365.

451 Itay Safran and Ohad Shamir. Spurious local minima are common in two-layer relu neural net-  
452 works. In *Proceedings of the 35th International Conference on Machine Learning, ICML 2018,*  
453 *Stockholmsmässan, Stockholm, Sweden, July 10-15, 2018*, volume 80 of *Proceedings of Machine*  
454 *Learning Research*, pages 4430–4438. PMLR, 2018a. URL [http://proceedings.mlr.press/](http://proceedings.mlr.press/v80/safran18a.html)  
455 [v80/safran18a.html](http://proceedings.mlr.press/v80/safran18a.html).

456 Itay Safran and Ohad Shamir. Spurious local minima are common in two-layer relu neural networks.  
457 In *International conference on machine learning*, pages 4433–4441. PMLR, 2018b.

458 Etienne Sandier and Sylvia Serfaty. Gamma-convergence of gradient flows with applications to  
459 Ginzburg-Landau. *Communications on Pure and Applied Mathematics: A Journal Issued by the*  
460 *Courant Institute of Mathematical Sciences*, 57(12):1627–1672, 2004.

461 Sylvia Serfaty. Gamma-convergence of gradient flows on Hilbert and metric spaces and applications.  
462 *Discrete Contin. Dyn. Syst.*, 31(4):1427–1451, 2011.

463 Shai Shalev-Shwartz and Shai Ben-David. *Understanding machine learning: From theory to*  
464 *algorithms*. Cambridge university press, 2014.

465 Jonathan W Siegel and Jinchao Xu. Approximation rates for neural networks with general activation  
466 functions. *Neural Networks*, 128:313–321, 2020.

467 Jonathan W Siegel and Jinchao Xu. Characterization of the variation spaces corresponding to shallow  
468 neural networks. *arXiv preprint arXiv:2106.15002*, 2021.

469 Jonathan W Siegel and Jinchao Xu. Sharp bounds on the approximation rates, metric entropy, and  
470 n-widths of shallow neural networks. *Foundations of Computational Mathematics*, pages 1–57,  
471 2022.

472 Jonathan W Siegel and Jinchao Xu. Characterization of the variation spaces corresponding to shallow  
473 neural networks. *Constructive Approximation*, pages 1–24, 2023.

474 Justin Sirignano and Konstantinos Spiliopoulos. Scaling limit of neural networks with the xavier  
475 initialization and convergence to a global minimum. *arXiv preprint arXiv:1907.04108*, 2019.

476 Justin Sirignano and Konstantinos Spiliopoulos. Mean field analysis of neural networks: A law of  
477 large numbers. *SIAM Journal on Applied Mathematics*, 80(2):725–752, 2020a.

478 Justin Sirignano and Konstantinos Spiliopoulos. Mean field analysis of neural networks: A central  
479 limit theorem. *Stochastic Processes and their Applications*, 130(3):1820–1852, 2020b.

480 Luca Venturi, Afonso S Bandeira, and Joan Bruna. Spurious valleys in two-layer neural network  
481 optimization landscapes. *arXiv preprint arXiv:1802.06384*, 2018.

482 Stephan Wojtowytsch. On the convergence of gradient descent training for two-layer relu-networks  
483 in the mean field regime. *arXiv preprint arXiv:2005.13530*, 2020.

484 Stephan Wojtowytsch. Optimal bump functions for shallow relu networks: Weight decay, depth  
485 separation and the curse of dimensionality. *arXiv preprint arXiv:2209.01173*, 2022.

486 Lei Wu, Mingze Wang, and Weijie Su. The alignment property of sgd noise and how it helps select flat  
487 minima: A stability analysis. *Advances in Neural Information Processing Systems*, 35:4680–4693,  
488 2022.

489 Yaoqing Yang, Liam Hodgkinson, Ryan Theisen, Joe Zou, Joseph E Gonzalez, Kannan Ramchandran,  
490 and Michael W Mahoney. Taxonomizing local versus global structure in neural network loss  
491 landscapes. *Advances in Neural Information Processing Systems*, 34:18722–18733, 2021.

492 Pan Zhou, Jiashi Feng, Chao Ma, Caiming Xiong, Steven Chu Hong Hoi, et al. Towards theoretically  
493 understanding why sgd generalizes better than adam in deep learning. *Advances in Neural*  
494 *Information Processing Systems*, 33:21285–21296, 2020.

|     |                                                                                                                |           |
|-----|----------------------------------------------------------------------------------------------------------------|-----------|
| 495 | <b>Appendix</b>                                                                                                |           |
| 496 | <b>A Numerical Experiments</b>                                                                                 | <b>14</b> |
| 497 | <b>B <math>\Gamma</math>-convergence</b>                                                                       | <b>22</b> |
| 498 | <b>C Homogeneous Barron spaces</b>                                                                             | <b>24</b> |
| 499 | <b>D Rademacher complexity of homogeneous Barron space</b>                                                     | <b>27</b> |
| 500 | <b>E Proofs of the convergence theorems</b>                                                                    | <b>32</b> |
| 501 | <b>F Theorem 2.1 for finite data sets</b>                                                                      | <b>38</b> |
| 502 | <b>G Minimum norm interpolation in one dimension</b>                                                           | <b>38</b> |
| 503 | <b>H Sub-Gaussian random variables</b>                                                                         | <b>39</b> |
| 504 | <b>A Numerical Experiments</b>                                                                                 |           |
| 505 | <b>A.1 Hyperparameter settings and computation effort</b>                                                      |           |
| 506 | In all experiments in Dimensions 3 and 15, the following hyperparameter settings were used unless              |           |
| 507 | otherwise indicated:                                                                                           |           |
| 508 | 1. Normal Xavier initialization with gain $\alpha = \sqrt{2}$                                                  |           |
| 509 | 2. SGD: Learning rate = $10^{-2}$ (Dimension 15), $10^{-3}$ (Dimension 3).                                     |           |
| 510 | 3. Momentum-SGD: Learning rate = $10^{-3}$ and momentum $\mu = 0.99$                                           |           |
| 511 | 4. ADAM: Learning rate = $10^{-3}$ and PyTorch default hyperparameters for $\beta_1 = 0.9, \beta_2 =$          |           |
| 512 | $0.999, \varepsilon = 10^{-8}$ .                                                                               |           |
| 513 | For experiments in Dimension 31, we drop the learning rate for ADAM after 50 of 150 epochs by a                |           |
| 514 | factor of 10 and for Momentum-SGD by a factor of 10 after 100 epochs.                                          |           |
| 515 | In Dimension 3, a learning rate of $10^{-2}$ was found numerically unstable for SGD without momentum.          |           |
| 516 | To compensate for the smaller learning rate and provide a fair comparison, the number of time steps            |           |
| 517 | was increased.                                                                                                 |           |
| 518 | All experiments were performed on a free version of google colab or the experimenters' personal                |           |
| 519 | computers. One run of the model takes below fifteen minutes on a single graphics processing unit.              |           |
| 520 | <b>A.2 Summary and interpretation of additional simulations</b>                                                |           |
| 521 | In this Section, we present additional numerical experiments in various situations complementary               |           |
| 522 | to those presented in the main body of the text. These include: Wider neural networks (Appendix                |           |
| 523 | A.3), experiments with different optimizers (Appendix A.4), experiments with different initialization          |           |
| 524 | to explore effects of scale and symmetry and the role of explicit regularization (Appendices A.8               |           |
| 525 | and A.5), experiments with $\ell^1$ -loss instead of $\ell^2$ -loss (Appendix A.7) and repeated experiments to |           |
| 526 | visualize the stochastic variation between runs (Appendix A.6).                                                |           |
| 527 | Additionally, we present an investigation into related settings where our theoretical understanding            |           |
| 528 | does not apply: In Appendix A.10, we consider linearized (random feature) dynamics to explore                  |           |
| 529 | how close we are to a (truly non-linear) neural network model. In Appendix A.11, we consider                   |           |
| 530 | neural networks with a single hidden layer and leaky ReLU activation instead of ReLU activation. In            |           |
| 531 | Appendix A.12, we consider ReLU networks with multiple hidden layers. For a detailed list, see the             |           |
| 532 | table of contents below.                                                                                       |           |

|     |                                                                                            |    |
|-----|--------------------------------------------------------------------------------------------|----|
| 533 | A.3 Wide neural networks in one dimension . . . . .                                        | 15 |
| 534 | A.4 SGD and ADAM: Dimensions 3 and 15 . . . . .                                            | 15 |
| 535 | A.5 Radial symmetry in Dimension 31 . . . . .                                              | 15 |
| 536 | A.6 Gradient descent with Momentum . . . . .                                               | 17 |
| 537 | A.7 $\ell^1$ -loss and Huber loss . . . . .                                                | 17 |
| 538 | A.8 Initialization scaling and explicit regularization: high-dimensional radial data . . . | 18 |
| 539 | A.9 He initialization . . . . .                                                            | 18 |
| 540 | A.10 Linearized dynamics . . . . .                                                         | 19 |
| 541 | A.11 Leaky ReLU activation . . . . .                                                       | 21 |
| 542 | A.12 Deeper neural networks . . . . .                                                      | 21 |

Our goal is not to explore questions of loss function, initialization, optimization algorithm and the impact of hyperparameters in a systematic fashion, but rather to establish problems in which a minimum norm interpolant can be found in an explicit fashion as instructive benchmarks to numerically study such questions. As a proof of concept, we provide a partial exploration of the parameter space. For the moment, we find ourselves confined to ReLU networks with a single hidden layer, as this is the only case in which explicit minimum norm interpolants are available. Minimum norm interpolation describes the shape of functions between known data clusters and is thus more expressive than a study of generalization error which is naturally confined to data clusters.

The additional experiments corroborate our findings in the main text. Before the detailed presentation, let us briefly summarize the conclusions.

1. Across a variety of different optimizers, Xavier type (= Glorot type) initialization schemes and loss functions, a minimum Barron norm interpolant-like shape was attained, to varying degrees of accuracy and with different rescaling factors.
2. Solutions are fairly radially symmetric with standard deviation in radial direction at most 0.1 (SGD) and 0.2 (Adam).
3. A geometrically distinct shape is observed for random feature models in the same regime.
4. Explicit regularization has little effect, even for poorly chosen initializations of Xavier type with high gain. We conjecture that the uniqueness of the radially symmetric minimum norm interpolant induces a higher degree of rigidity and bias, compared to the one-dimensional case where the set of minimum norm solutions was diverse (and infinite).
5. Functions display larger variation in the radial direction for He initialization. In this regime, explicit regularization has more apparent and beneficial effects on both solution shape and radial symmetry. The solution does not reduce to the random feature model in this case either.

### A.3 Wide neural networks in one dimension

In Figure 5, we present the same experiment as in Figure 2 for wider neural networks with  $m = 1,000$  neurons in the hidden layer.

### A.4 SGD and ADAM: Dimensions 3 and 15

We repeat the experiment on Figure 3 for Stochastic Gradient Descent (SGD) optimizer without momentum and for the Adam optimizer of Kingma and Ba [2014]. The results are displayed in Figure 6 and 7 respectively. The results strongly resemble those obtained for the SGD optimizer with momentum in Figure 3.

### A.5 Radial symmetry in Dimension 31

As indicated in Figure 4, we present computational results with the radially symmetric normal Xavier initialization in Figure 8.

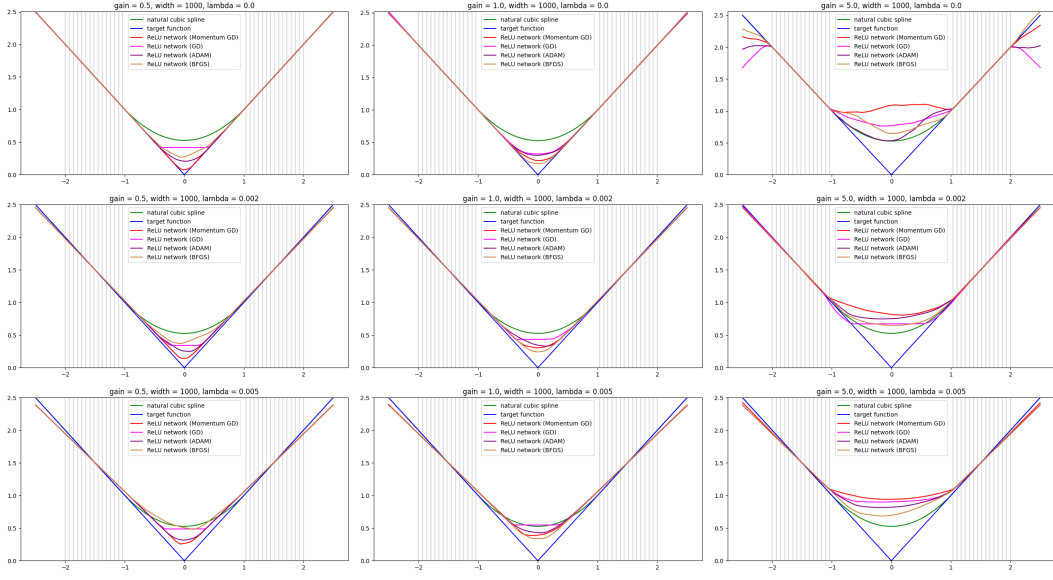

Figure 5: For wider neural networks, we observe less stochastic variation between runs, as the empirical distribution of neurons is closer to a continuum limit. Solutions are generally more convex and symmetric than their narrow counterparts. The gradient descent optimizer without momentum stands out for its tendency to select solutions with highly localized second derivatives and a preference for piecewise linear functions with few linear regions, while other training algorithms select ‘smoother’ solutions with curvatures which are dispersed more evenly throughout the domain.

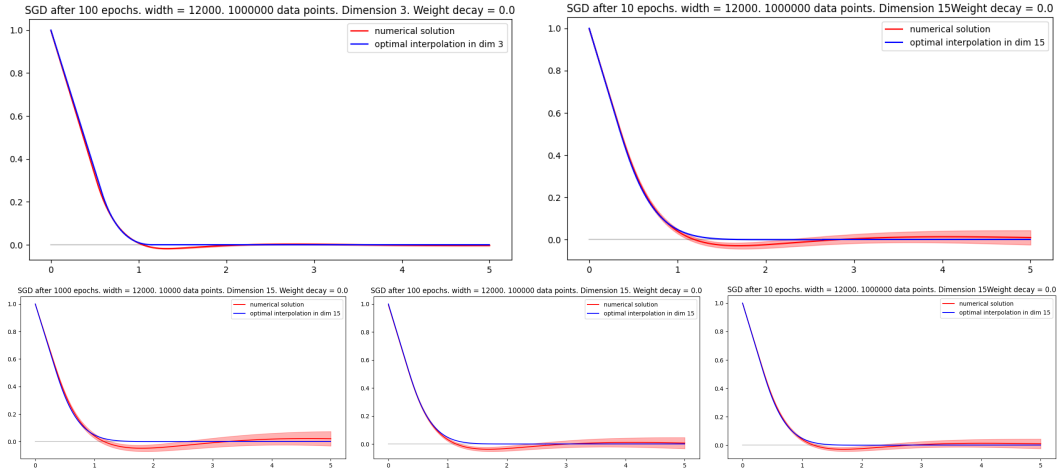

Figure 6: We perform the same experiments as for Figure 3, but with the SGD without momentum optimizer. Learning rate was adjusted to  $10^{-2}$  for dimension 15, but for dimension 3 we just used  $10^{-3}$  learning rate and ran 10 times more epochs, due to stability of neural network training in dimension 3 case. The results are comparable, but the rescaling factors were chosen as  $1/1.15$  in dimension 3 and  $1/2.65$  in dimension 15.



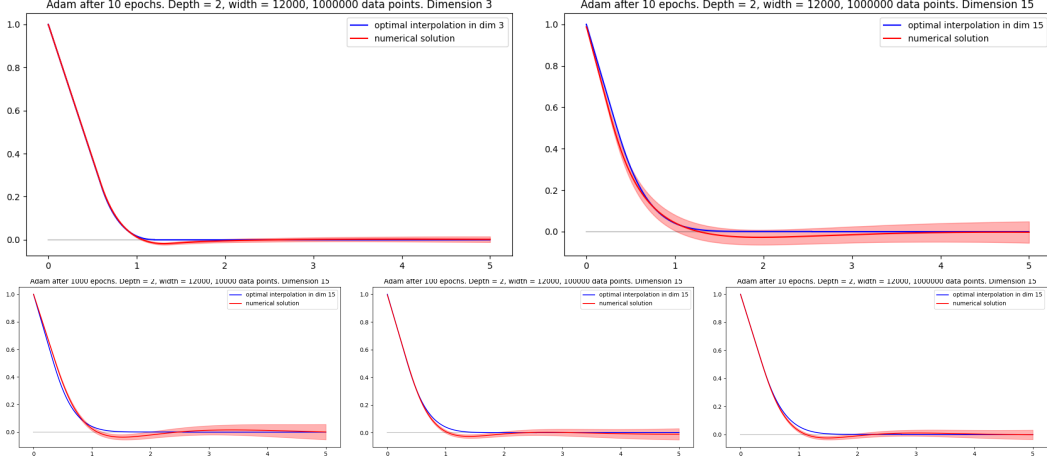

Figure 7: We repeat the experiments of Figure 3, but with Adam. The numerical solutions resemble those found by Momentum-SGD, but better rescaling factors for numerical solutions are  $1/1.2$  in dimension 3 and  $1/2.75$  rather than  $1/1.05$  and  $1/2.55$ , i.e. the functions are ‘flatter’.

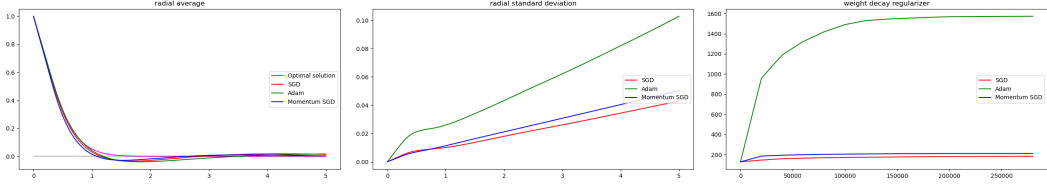

Figure 8: Results between normal and uniform Xavier initialization are essentially identical in this experiment – compare Figure 4. (Approximate) radial symmetry is attained even when parameters are initialized in a fashion which is not radially symmetric.

## 578 A.6 Gradient descent with Momentum

579 In Figure 9, we present additional runs in the setting of Figure 3. Despite quantitative variation,  
 580 the geometric shapes of solutions are stable over multiple runs and resemble the minimum norm  
 581 interpolant  $f_{15}^*$  in all cases.

## 582 A.7 $\ell^1$ -loss and Huber loss

583 We repeat the experiment of Figure 3 with the  $\ell^1$ -loss function in the place of  $\ell^2$ -loss. To compensate  
 584 for the lack of smoothness in the loss function, we reduce the learning rate by a factor of 10 to  $10^{-4}$   
 585 and increase the number of epochs by 50% to compensate. Results are reported in Figure 10.

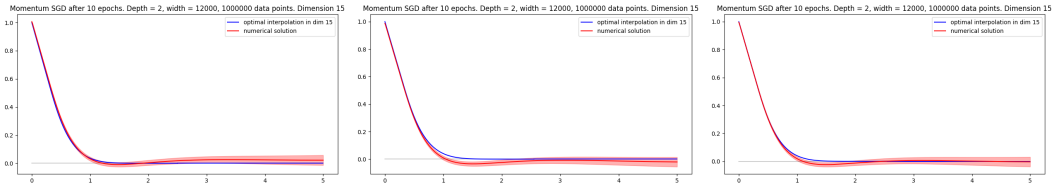

Figure 9: Three realizations of numerical interpolations in the setting of Section 5.2, computed by SGD with learning rate  $\eta = 10^{-3}$  and momentum  $\mu = 0.99$ . In all cases, the minimum norm interpolant shape is attained approximately, but the radial averages briefly dip below zero and exhibit a local minimum which is not found in  $f_d^*$ . The variation between runs is notable, but not large.

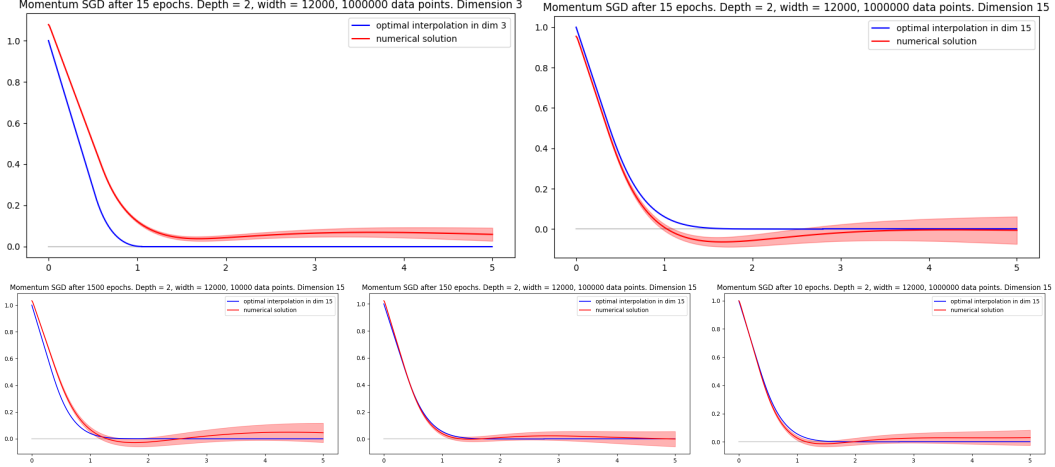

Figure 10:  $\ell^1$ -loss leads to similar numerical results with a smaller rescaling factor of  $1/2.8$  rather than  $1/2.5$  for  $\ell^2$ -loss. Curiously,  $f(0) > 1$  for these algorithms, while  $f(0) \leq 1$  when optimizing  $\ell^2$ -loss. In Dimension  $d = 3$ , the non-smoothness leads to a minimization problem that is not well resolved by the numerical optimization algorithm.

Similarly, we repeated experiments with the Huber loss function. Since  $|f(x_i) - f^*(x_i)| < 1$  over the data set during the final stages of training, the loss function coincides with  $\ell^2$ -loss in the long run and all experiments are identical to  $\ell^2$ -loss. We therefore do not present additional plots.

In the initial stages of training, Huber loss is more stable numerically than  $\ell^2$ -loss, especially for large gain or He initialization (compare Section A.9).

#### A.8 Initialization scaling and explicit regularization: high-dimensional radial data

As noted in Section 5.1 and previously by Chizat et al. [2019], the choice of initialization affects the optimization process of neural networks. Motivated by our observations in the one-dimensional case, we consider the effects of initialization and explicit regularization in the radially symmetric setting (Section 5.2). Our results support the earlier claim that the effects of regularization are advantageous for poorly chosen initialization with high gain.

The experiments were performed in higher dimension 31 and with *uniform* Xavier initialization for the scenario in which it is most challenging to obtain radially symmetric solutions. As in Appendix A.7, we used  $\ell^1$ -loss rather than  $\ell^2$ -loss. To compensate for the non-smoothness of the loss function, we drop the learning rate by a factor of 10 twice during the training process. Similar results were observed for  $\ell^2$ -loss, but the effects of initialization and regularization were less pronounced compared to the  $\ell^1$ -case.

Plots for a single representative run are displayed in Figure 11. The explicit regularizer has the clearest effect in the high gain regime, where explicit regularization helps to achieve a better fit with the optimal transition curve and reduces the radial standard variation. Results were less sensitive to poor initialization than the corresponding experiments in one dimension. We conjecture that a higher degree of rigidity is introduced in this setting by the fact that there exists a *unique* minimum norm interpolant.

#### A.9 He initialization

All experiments so far were performed with the initialization scaling of Glorot and Bengio [2010]. Especially for deeper neural networks, the initialization scheme of He et al. [2015] is very popular. Hanin and Rolnick [2018] proves in particular that He et al. [2015]’s normalization avoids the vanishing and exploding gradients phenomenon at initialization in expectation. While this consideration does not apply to our shallow networks, we find it informative to compare the two schemes.

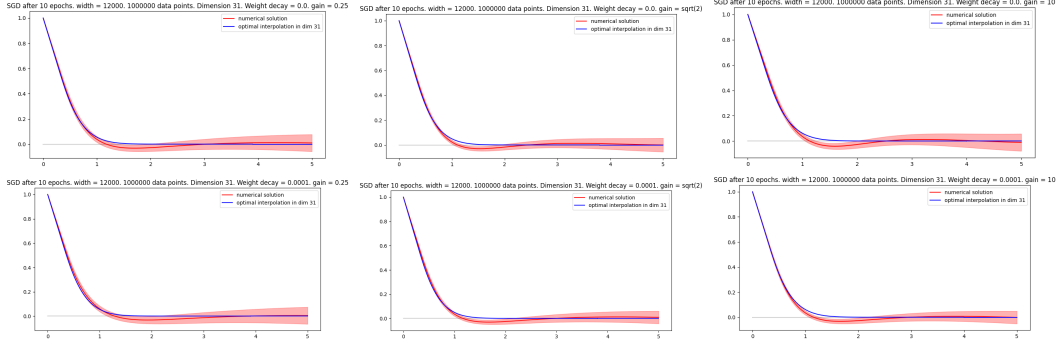

Figure 11: We vary initialization scale ( $\alpha \in \{0.25, \sqrt{2}, 10\}$  from left to right) and consider training without weight decay (top row) and with weight decay  $\lambda = 10^{-4}$  (bottom row). The rescaling factors are chosen to be  $1/3.9$  for  $\alpha = 0.25$ ,  $1/3.8$  for  $\alpha = \sqrt{2}$ , and  $1/4$  for  $\alpha = 10$ .

For shallow neural networks

$$f_m : \mathbb{R}^d \rightarrow \mathbb{R}, f_m(x) = \sum_{i=1}^m a_i \sigma(w_i \cdot x + b_i)$$

the effect of initialization is as follows:

1. According to Glorot and Bengio [2010], the parameters  $a_i$  and  $w_{ij}$ ,  $1 \leq i \leq m$  and  $1 \leq j \leq d$  are chosen as random variables with mean 0 and standard deviation  $\sqrt{2/(m+1)}$  for  $a_i$  and  $\sqrt{2/(m+d)}$  for  $w_{i,j}$ . In particular, if  $m$  is much larger than  $d$ , then the  $|a_i| \|w_i\| = O(1/m)$ . As we add  $m$  terms of magnitude  $\sim 1/m$ , we consider this the ‘law of large numbers’ scaling.
2. According to He et al. [2015], the parameters  $a_i$  and  $w_{ij}$ ,  $1 \leq i \leq m$  and  $1 \leq j \leq d$  are chosen as random variables with mean 0 and standard deviation  $\sqrt{2/m}$  for  $a_i$  and  $\sqrt{2/d}$  for  $w_{i,j}$ . In particular, if  $m$  is much larger than  $d$ , then the  $|a_i| \|w_i\| = O(1/\sqrt{m})$ . As we add  $m$  terms of mean zero and magnitude  $\sim 1/\sqrt{m}$ , we consider this the ‘central limit theorem’ scaling.

Many authors, such as Sirignano and Spiliopoulos [2020a,b, 2019], present the factor  $1/m$  or  $1/\sqrt{m}$  explicitly outside the neural network. As observed above, the effect of initialization can be significant. Unsurprisingly, results in the central limit regime, where all neurons contribute similarly at initialization, are more consistent and predictable. Experimental results are presented in Figure 12 in the one-dimensional setting and in Figures 13 and 14 in the case of radial symmetry. Notably, in high dimension, explicit regularization not only reduced radial variation, but also increased data compliance by reducing the rescaling factor  $r_d$ . In this setting, we observe the benefits of explicit regularization over relying on implicit bias only.

## A.10 Linearized dynamics

Parameter optimization in neural networks depends heavily on the choice of initialization. While the dynamics are truly non-linear in the regime studied by Chizat and Bach [2018], Rotskoff and Vanden-Eijnden [2018], Mei et al. [2018], Sirignano and Spiliopoulos [2020a] and Wojtowysch [2020], there are scalings for which the directions  $w_i$  remain close to their initialization for all time – see e.g. [E et al., 2019b] for a derivation. In this case, the solution produced by a neural network is similar to that of a random feature model. In this section, we numerically find the minimum norm interpolant of a random feature model by ‘freezing’ the inner layer coefficients at their random initialization. We find that the random feature solution differs geometrically from the Barron space solution, e.g. in that it is smooth at the origin, where the Barron space solution has a cone-like singularity of the form  $f(x) = 1 - c_d \|x\|_2$  for small  $x$ . In particular, we find that our experiments were set appropriately in the non-linear training regime. See Figure 15.

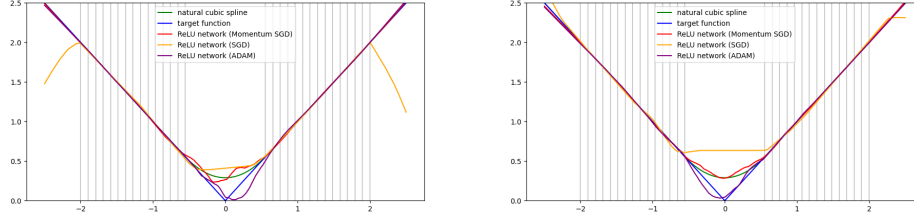

Figure 12: Experiments for He initialization in one Dimension in the same setting as Figure 2 with Xavier initialization. Left: No explicit regularization, right: Weight decay regularization  $\lambda = 0.002$ . Even for Glorot initialization with large gain, this regularizer was sufficient to induce convexity. For He initialization, it has a notable regularizing effect, but it is insufficient to impose convexity. We observe greater deviation from a linear function in the small intervals between known data points on either side of the big ‘gap’.

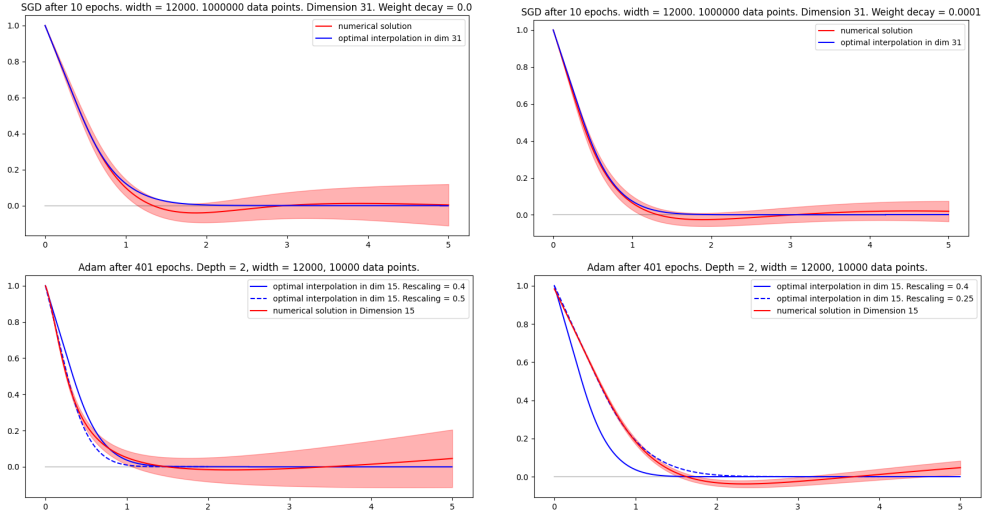

Figure 13: **Top row:** Experiments for He initialization in dimension 31 in the same setting as Appendix A.8. **Left:** No explicit regularization with a rescaling factor  $r_d = 1/4.9$ , **Right:** Weight decay regularization with  $\lambda = 10^{-4}$  and rescaling factor  $r_d = 1/4.2$ . We observe that under He initialization the effects of the explicit regularizer is even more pronounced. Unlike in other experiments, the presence of regularization *increases* the rescaling factor and thus improves the fit to training data (for the radial profile).

**Bottom row:** We repeat the same as above with MSE loss rather than  $\ell^1$ -loss, using the Adam optimizer with learning rate  $10^{-5}$  instead of SGD with momentum, and using an overparametrized rather than underparametrized neural network. Without explicit regularization (left), the radial standard deviation is substantial, while explicit regularization leads to a more radially symmetric function, albeit at the price of a higher rescaling factor. For easy comparison to Figure 3, we present the optimal profile as rescaled in the main document as well. Both functions achieve training loss  $< 10^{-3}$ , but clearly generalization is poor without regularization: While the radial average is close to the target function  $f^* \equiv 0$  for inputs with  $\|x\| \geq 1$ , the radial variation is high.

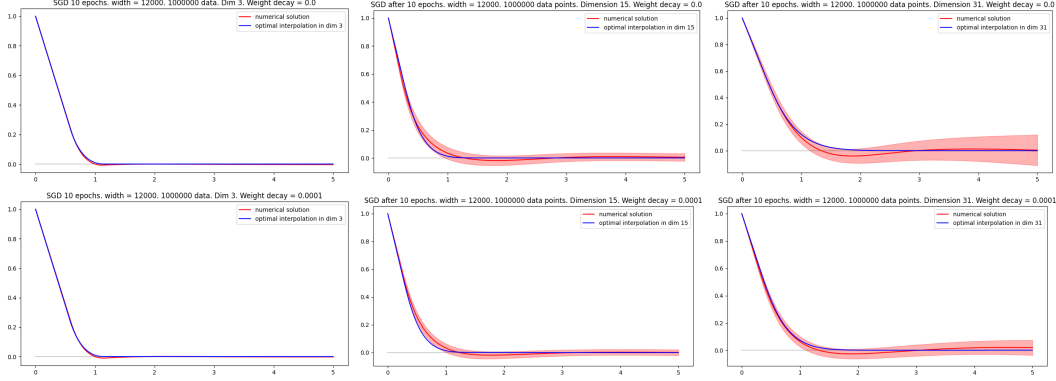

Figure 14: We examine the effects of the explicit regularizer (weight decay penalty  $\lambda = 0$  for the top row and  $\lambda = 10^{-4}$  for the bottom row) while varying dimensions ( $d = 3, 15, 31$  from left to right) in the He initialization scheme. Optimizer settings were identical to the top row in Figure 13. The rescaling factors were  $r_3 = 1/1.15$ ,  $r_{15} = 1/2.1$ , and  $r_{31} = 1/4.2$ . As dimension grows implicit bias may be insufficient to find a minimum norm interpolant shape with reasonable scaling factor and may not enforce radial symmetry. In this case explicit regularizer may have an advantage.

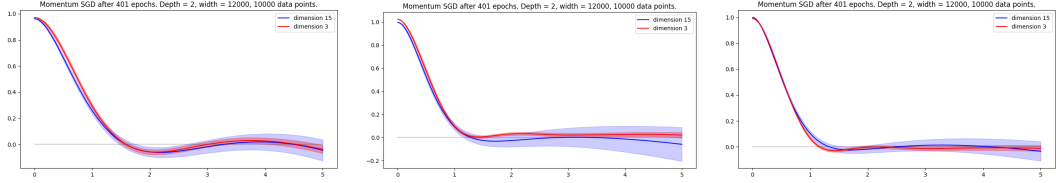

Figure 15: A random feature model trained on the same dataset as the neural networks. The solutions produced this way are geometrically distinct from neural network solutions as they are ‘flat’ at the origin. The left two figures correspond to different initializations: Gain  $\alpha = \sqrt{2}$  (left) and gain  $\alpha = 5$  (right). Notably, the variation is higher in radial direction in high dimension and higher than for the comparable neural network model. Perhaps surprisingly, higher gain appears to induce a better implicit bias in this case. No explicit regularization was used. Here we initialized the random feature by the same law as the neural network rather than initializing the outer layer at zero, since our goal is to study neural network dynamics, not find the optimal random feature solution. For the right plot, the initialization was random normal with gain 5 in the inner layer and zero in the outer layer with unsurprisingly better results.

#### 647 A.11 Leaky ReLU activation

648 As noted by Wojtowysch [2022], minimum norm interpolation is not stable when passing to an  
 649 equivalent norm. A Barron space theory can be developed in perfect analogy for networks with the  
 650 leaky ReLU activation function, and it is easy to see that the ‘Barron’ spaces for both activation  
 651 functions coincide with equivalent norms, depending on the negative slope of the leaky ReLU  
 652 function. However, the minimum norm interpolant  $f_d^*$  with respect to the ReLU-based Barron-norm  
 653 is not guaranteed to coincide with the minimum interpolant for the leaky-ReLU-based Barron norm.  
 654 Experimentally, however, we observe strong agreement between the geometry of numerical solutions  
 655 here.

#### 656 A.12 Deeper neural networks

657 We train neural networks of depth  $L > 2$  to fit the same radially symmetric data as in Section 5.2.  
 658 We see in Figure 17 that for depth  $L \geq 3$ , weight decay-regularized networks strongly resemble the  
 659 interpolant  $f_{Lip}(x) = \max\{1 - \|x\|_2, 0\}$  with minimal (Euclidean) Lipschitz constant. This function  
 660 can be written as a composition of two Barron functions  $f = f_{bump} \circ f_{norm}$

$$f_{bump}(z) = \max\{1 - z, 0\} = \sigma(1 - z), \quad f_{norm}(x) = \|x\|_2 = c_d \mathbb{E}_{\nu \sim \pi^0} [\sigma(\nu \cdot x)]$$

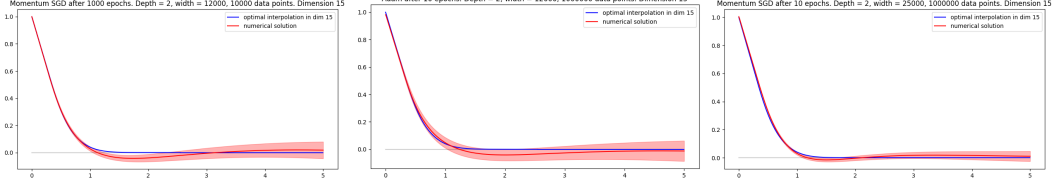

Figure 16: Neural networks with a single hidden layer and leaky ReLU activation  $\sigma(z) = \max\{z, 0\} + 0.1 \min\{z, 0\}$  trained in the setting of Section 5.2. Without theoretical foundation, we observe that the shape of  $f_d^*$  is attained to high accuracy also in this setting with the same rescaling factors as in the ReLU setting. **Left:** Momentum-SGD, **Middle:** Adam, **Right:** Momentum-SGD for a wider network with  $m = 25,000$ .

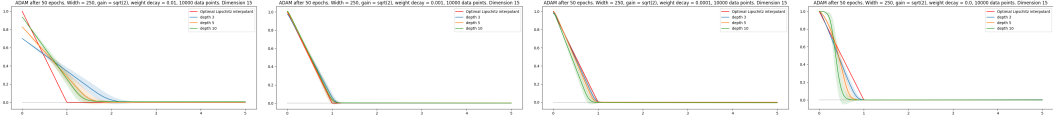

Figure 17: Neural networks of width 250 and varying depth were trained to fit data generated as in Section 5.2 with weight decay regularizers  $10^{-2}$ ,  $10^{-3}$ ,  $10^{-4}$  and 0 (left to right). The initialization gain variable was chosen as  $\alpha = \sqrt{2}$  as required to avoid exploding and vanishing gradients in deeper networks. Evidently, a small amount of weight decay regularization provides useful geometric prior without diminishing the quality of data fit.

Unlike networks with one hidden layer, deeper networks have positive (or nearly positive) outputs everywhere. While two-layer networks follow the minimum norm interpolation shape closely by the origin and have radial variances which increase outside the unit ball, deeper networks have positive radial variance inside the unit ball, but are essentially radially symmetric outside – compare e.g. Figure 9.

where  $\pi^0$  denotes the uniform distribution on the unit sphere and  $c_d \sim \sqrt{d}$  is a dimension-dependent constant. We can thus approximate  $f_{Lip}$  efficiently by neural networks of depth  $L \geq 3$  as long as the first layer is sufficiently wide.

Unlike their shallow counterparts, neural networks with multiple hidden layers have no strong geometric prior without weight decay regularization. With weight decay, the observed behavior was relatively stable over a range of dimensions, initializations scalings and optimization algorithms. We are led to conjecture that  $f_{Lip}$  is a minimum norm interpolant in this setting. The statement remains imprecise at this point as no function space theory for deeper networks with weight decay regularizer has been developed to the same extent as Barron space theory.

## B $\Gamma$ -convergence

In this appendix, we recall the definition and a few properties of  $\Gamma$ -convergence, a popular notion of the convergence of functionals introduced by De Giorgi and Franzoni [1975] in the calculus of variations to study the convergence of minimization problems. Braides [2002], Dal Maso [2012] provide introductions to the theory and its applications. As the notion is likely not familiar to readers from the machine learning community, we provide some full proofs as well.

**Definition B.1.** Let  $(X, d)$  be a metric space and  $F_n, F : X \rightarrow \mathbb{R} \cup \{-\infty, \infty\}$  be functions. We say that  $F_n$  converges to  $F$  in the sense of  $\Gamma$ -convergence if two conditions are met:

1. (lim inf-inequality) If  $x_n$  is a sequence in  $X$  and  $x_n \rightarrow x$ , then  $\liminf_{n \rightarrow \infty} F_n(x_n) \geq F(x)$ .
2. (lim sup-inequality) For every  $x \in X$ , there exists a sequence  $x_n^* \in X$  such that  $x_n^* \rightarrow x$  and  $\limsup_{n \rightarrow \infty} F_n(x_n^*) \leq F(x)$ .

Intuitively, the first condition means that  $F(x)$  is (almost) a lower bound for  $F_n(x_n)$  if  $n$  is ‘large’ and  $x_n$  is ‘close’ to  $x$ , while the second condition means that there is no larger lower bound that we could choose. The sequence  $x_n^*$  is often referred to as a ‘recovery sequence’. Of course,

combining the liminf- and limsup-inequalities, we find that in fact  $F_n(x_n^*) \rightarrow F(x)$ . We employ  $\Gamma$ -convergence when dealing with minimization problems where uniform convergence fails, but we hope for convergence of minimizers to minimizers.

Often,  $\Gamma$ -convergence is considered as a continuous parameter  $\varepsilon$  approaches  $0^+$  rather than as the discrete parameter  $n$  approaches infinity. The definitions remain largely identical (with obvious substitutions).

To get a feeling for  $\Gamma$ -convergence, we consider a particularly simple situation by looking at two constant sequences of functions. Note that the sequence is constant, not the functions.

**Example B.2.** Let  $X = \mathbb{R}$  and consider the constant sequences

$$F_n(x) = f(x) = \begin{cases} 1 & x \neq 0 \\ 0 & x = 0 \end{cases}, \quad G_n(x) = g(x) = \begin{cases} 0 & x \neq 0 \\ 1 & x = 0 \end{cases}.$$

We claim that

$$(\Gamma - \lim_{n \rightarrow \infty} F_n)(x) = f(x), \quad (\Gamma - \lim_{n \rightarrow \infty} G_n)(x) = 0 \quad \forall x \in \mathbb{R}.$$

If  $x_n \rightarrow x$  and  $x \neq 0$ , then  $F_n(x_n) = 1$  and  $G_n(x_n) = 0$  for all but finitely many  $n \in \mathbb{N}$ , meaning that  $F_n(x_n) \rightarrow 1 = f(x)$  and  $G_n(x_n) \rightarrow 0$ . It remains to consider the case  $x_n \rightarrow 0$ .

We see immediately that  $F_n(x_n) \geq 0 = f(0)$  for all  $n \in \mathbb{N}$ . Conversely, if we take  $x_n^* = 0$  for all  $n$ , then  $x_n^* \rightarrow 0$  and  $F_n(x_n^*) = f(0) \rightarrow f(0)$ . In total, we conclude that  $\Gamma - \lim F_n = f$ .

For  $G_n$ , we find that  $G_n(x_n) \geq 0$  for all  $n \in \mathbb{N}$ . Additionally, we can choose the sequence  $x_n = 1/n$  such that  $G_n(x_n) = 0$  for all  $n \in \mathbb{N}$ . Altogether, we find that  $\Gamma - \lim G_n = 0$ .

More generally, if  $F_n = F$  for all  $n \in \mathbb{N}$  and some  $F : X \rightarrow \mathbb{R}$ , then  $\Gamma - \lim_{n \rightarrow \infty} F_n = \bar{F}$  is the lower semi-continuous envelope of  $F$ . In particular,  $\Gamma - \lim_{n \rightarrow \infty} F = F$  if and only if  $F$  is lower semi-continuous. The main useful properties of  $\Gamma$ -convergence are summarized in the following lemma.

**Lemma B.3.** Assume that  $F_n \rightarrow F$  in the sense of  $\Gamma$ -convergence,  $\varepsilon_n \rightarrow 0^+$  and  $x_n \in X$  is a sequence such that

$$F_n(x_n) \leq \inf_{x \in X} F_n(x) + \varepsilon_n.$$

Assume that  $x_n \rightarrow x^*$ . Then  $F(x^*) = \inf_{x \in X} F(x)$ . In particular, if  $x_n$  is a minimizer of  $F_n$  and the sequence  $x_n$  converges, then the limit point is a minimizer of  $F$ .

Clearly, this is most useful if we can guarantee that the sequence  $x_n$  converges. For many useful sequences of functionals, the existence of a convergent subsequence can be established by compactness. This is easily sufficient, as we can also pass to a subsequence in  $F_n$ .

*Proof.* Due to the liminf-inequality, we have

$$F(x^*) \leq \liminf_{n \rightarrow \infty} F_n(x_n) = \liminf_{n \rightarrow \infty} \inf_{x \in X} F_n(x).$$

On the other hand, let  $x \in X$  be any point. Then, due to the limsup-inequality, there exists some sequence  $x'_n$  such that

$$x'_n \rightarrow x, \quad F(x) = \lim_{n \rightarrow \infty} F_n(x'_n) \geq \liminf_{n \rightarrow \infty} \inf_{x \in X} F_n(x).$$

In particular  $\inf_{x \in X} F(x) \geq \liminf_{n \rightarrow \infty} \inf_{x \in X} F_n(x)$ . Combining the two estimates, we find that  $F(x^*) \leq \inf_{x \in X} F(x)$ , which means that  $x^*$  is a minimizer of  $F$ .  $\square$

For completeness, a few observations are in order.

1. The notion of  $\Gamma$ -convergence relies on the notion of convergence on the underlying space  $X$ , and  $\Gamma$ -limits can change when keeping the set  $X$  fixed, but passing to a different topology (e.g. a weak topology in infinite-dimensional spaces).
2.  $\Gamma$ -convergence is made for minimization problems, and it does not behave well under multiplication by negative real numbers: In general  $\Gamma - \lim(-F_n) \neq -(\Gamma - \lim F_n)$ , even if both limits exist. The reason is the asymmetry between the lim inf- and the lim sup-condition. To see this, consider for instance  $F_n$  and  $G_n - 1$  in Example B.2.

724 3. If  $F_n \rightarrow F$  and  $G_n \rightarrow G$ , it is not necessarily true that  $F_n + G_n \rightarrow F + G$ . While it  
725 remains true that  $\liminf_{n \rightarrow \infty} (F_n + G_n)(x_n) \geq (F + G)(x)$  if  $x_n \rightarrow x$ , it may no longer  
726 be possible to find a recovery sequence  $x_n$  for  $F_n + G_n$ . For example, if  $F_n = 1_{\mathbb{Q}}$  and  
727  $G_n = 1_{\mathbb{R} \setminus \mathbb{Q}}$  for all  $n \in \mathbb{N}$ , then  $F_n \xrightarrow{\Gamma} 0$  and  $G_n \xrightarrow{\Gamma} 0$ , but  $F_n + G_n = 1$  for all  $n$  and  
728  $F_n + G_n \xrightarrow{\Gamma} 1$ .

729 However, if  $F_n \xrightarrow{\Gamma} F$  and  $G_n$  converges to a *continuous* limit  $G$  *uniformly*, then  $(F_n +$   
730  $G_n) \xrightarrow{\Gamma} F + G$ . In particular, uniform convergence implies  $\Gamma$ -convergence. Namely, if  
731  $G_n \rightarrow G$  uniformly,  $G$  is continuous and  $x_n \rightarrow x$ , then for given  $\varepsilon > 0$ , we can choose  
732  $N \in \mathbb{N}$  so large that

- 733 (a)  $|G(x_n) - G(x)| < \varepsilon/2$  for all  $n \geq N$  since  $G$  is continuous at  $x$  and  
734 (b)  $|G_n(x_n) - G(x_n)| < \varepsilon/2$  for all  $n \geq N$  due to uniform convergence.

735 Then

$$|G_n(x_n) - G(x)| \leq |G_n(x_n) - G(x_n)| + |G(x_n) - G(x)| < \varepsilon.$$

736 In particular  $G_n(x_n) \rightarrow G(x)$ . Recall that  $G$  is guaranteed to be continuous if  $G_n$  is  
737 continuous for all  $n \in \mathbb{N}$ .

- 738 4.  $\Gamma$ -convergence is unrelated to pointwise convergence of functions: Neither does it imply  
739 pointwise convergence, nor is it implied by it. Namely, the sequence  $G_n$  in Example B.2  
740 has the function  $g$  as a pointwise limit and the constant function 0 as a  $\Gamma$ -limit.  
741 5.  $\Gamma$ -convergence is not a notion of convergence derived from a topology. Indeed, even if  $F_n$  is  
742 a constant sequence, i.e. if  $F_n = G$  for all  $n$ , it may happen that  $\Gamma - \lim_{n \rightarrow \infty} F_n \neq G$  (see  
743  $G_n$  in Example B.2). The  $\Gamma$ -limit is related to  $G$ , though: It is the lower semi-continuous  
744 envelope of the function  $G$ . In fact, every  $\Gamma$ -limit is lower semi-continuous.

745 Despite its somewhat counterintuitive properties,  $\Gamma$ -convergence has proved invaluable in many areas  
746 of the calculus of variations. It has been applied to homogenization by Bach et al. [2021], dimension  
747 reduction for thin sheets and shells by Friesecke et al. [2002a, 2003, 2002b], Bhattacharya et al.  
748 [2016], Lewicka et al. [2010] and the study of phase boundaries by Modica and Mortola [1977],  
749 Modica [1987]. While the  $\Gamma$ -convergence of functionals does not imply the convergence of their  
750 gradient flows even in situations of practical significance (see e.g. the example of Dondl et al. [2019]),  
751 Serfaty [2011], Sandier and Serfaty [2004], Mugnai and Röger [2011], Ilmanen [1993], Alikakos  
752 et al. [1994] provide important examples of situations where this can be established in a suitable  
753 sense. Even more, Bronsard and Kohn [1990] use  $\Gamma$ -convergence to gain insight into PDE dynamics.

## 754 C Homogeneous Barron spaces

755 In this section, we introduce the abstract framework which is used to prove our main theoretical  
756 result, Theorem 3.3. A neural network with  $m$  neurons in a single hidden layer can be represented as

$$f_m(x) = b_0 + \sum_{i=1}^m a_i \sigma(w_i^T x + b_i) \quad \text{or} \quad f_m(x) = b_0 + \frac{1}{m} \sum_{i=1}^m a_i \sigma(w_i^T x + b_i). \quad (4)$$

757 The network weights and biases are  $(a, W, b) \in \mathbb{R}^m \times \mathbb{R}^{m \times d} \times \mathbb{R}^{m+1}$ . The normalization depends  
758 on personal preference, with the former being more common in practice and the latter more common  
759 in theoretic analyses. We define the weight decay regularizer by

$$R_{WD}(a, W, b) = \frac{\|a\|_{\ell^2}^2 + \|W\|_F^2}{2} = \frac{1}{2} \left( \sum_{i=1}^m a_i^2 + \sum_{i=1}^m \sum_{j=1}^d w_{ij}^2 \right)$$

760 or  $R_{WD}(a, W, b) = \frac{1}{2m} \sum_{i=1}^m (a_i^2 + \|w_i\|_{\ell^2}^2)$  respectively. Here  $\|\cdot\|_2$  denotes the Euclidean  $\ell^2$ -norm  
761 of a vector and  $\|W\|_F$  denotes the Frobenius norm of the matrix  $W$  whose rows are the vectors  $w_i^T$ .  
762 Note that we do not control the magnitude of the biases  $b_i$  in the regularizer. This is a common  
763 approach, as the bias does not influence the Lipschitz-constant of the function represented by the  
764 neural network, which is useful in studying the generalization of the neural network.



We study function classes corresponding to arbitrarily wide neural networks with a single hidden layer, where the norm corresponds to the weight decay regularizer. We dub these function spaces ‘homogeneous Barron spaces’ in analogy to the more classical Barron spaces studied by E et al. [2019c], Ma et al. [2020], E and Wojtowytsch [2020], which correspond to a weight decay regularizer which also controls the bias. For homogeneous Barron spaces, coordinate transformations by Euclidean motions induce an isometry of the function class, while the origin plays a special role in classical Barron spaces. This justifies our terminology, as the data space is treated as isotropic and homogeneous by this function class. Homogeneous Barron spaces have also been studied by Ongie et al. [2019], Parhi and Nowak [2021, 2022] under the name Radon-BV spaces. A closely related class of spaces has been considered as the ‘variation spaces of the ReLU dictionary’ by Siegel and Xu [2020, 2022, 2023].

Heuristically, (homogeneous) Barron spaces are a function class tailored to replacing the finite superposition of ReLU ridges in (4) by an arbitrary superposition while keeping the weight decay regularizer finite. Due to the lack of control over the bias term, we will see that a slightly awkward technical definition is needed. Let  $\pi$  be a probability distribution on the parameter space  $\mathbb{R} \times \mathbb{R}^d \times \mathbb{R}$ . We would like to define

$$f_{\pi, b_0} : \mathbb{R}^d \rightarrow \mathbb{R}, \quad f_{\pi, b_0}(x) = b_0 + \mathbb{E}_{(a, w, b) \sim \pi} [a \sigma(w^T x + b)] = \int_{\mathbb{R} \times \mathbb{R}^d \times \mathbb{R}} a \sigma(w^T x + b) \, d\pi_{(a, w, b)}$$

and

$$R_{WD}(\pi) = \frac{1}{2} \int_{\mathbb{R} \times \mathbb{R}^d \times \mathbb{R}} |a|^2 + \|w\|_2^2 \, d\pi_{(a, w, b)}.$$

$f_{\pi, b_0}$  is an analogue of neural networks with a single hidden layer, but of arbitrary and possibly uncountably infinite width. Every finite neural network can be expressed in this fashion for the empirical measure  $\pi_m = \frac{1}{m} \sum_{i=1}^m \delta_{(a_i, w_i, b_i)}$ , in which case  $R_{WD}(\pi_m) = R_{WD}(a, W, b)$ .

Unfortunately, even if  $R_{WD}(\pi) < \infty$ , it is not clear that the integral defining  $f_\pi$  exists in a meaningful sense. We do however note that formally

$$\begin{aligned} |f_\pi(x) - f_\pi(y)| &= \mathbb{E}[a \{\sigma(w^T x + b) - \sigma(w^T y + b)\}] \leq \mathbb{E}[|a| |w^T x + b| - |w^T y + b|] \\ &\leq \|x - y\| \mathbb{E}[|a| \|w\|] \leq \frac{\|x - y\|}{2} \mathbb{E}[|a|^2 + \|w\|^2] = \|x - y\| R_{WD}(\pi). \end{aligned}$$

Thus, the integral defining  $f_\pi(x)$  exists for all  $x$  if and only if it exists for, say,  $x = 0$ . We exploit this in the following modified definition. Let  $\pi$  be a probability distribution on the parameter space  $\mathbb{R} \times \mathbb{R}^d \times \mathbb{R}$  and  $y \in \mathbb{R}$ . We denote

$$f_{\pi, y}(x) = y + \mathbb{E}_{(a, w, b) \sim \pi} [a(\sigma(w^T x + b) - \sigma(b))]$$

By the same argument as before, we observe that

1.  $f_{\pi, y}(0) = y$  and
2.  $|f_{\pi, y}(x) - f_{\pi, y}(x')| \leq R_{WD}(\pi) \|x - x'\|$ .

The class of functions of the form  $f_{\pi, y}$  forms the homogeneous Barron space. Still, every finite neural network  $f_m$  can be represented in this fashion with  $b_0 = y - \sum_{i=1}^m a_i \sigma(b_i)$  or  $b_0 = y - \frac{1}{m} \sum_{i=1}^m a_i \sigma(b_i)$ .

**Definition C.1** (Homogeneous Barron space). *Let  $f : \mathbb{R}^d \rightarrow \mathbb{R}$  be a function. We define the semi-norms*

$$[f]_{\mathcal{B}} = \inf_{f \equiv f_{\pi, y}} R_{WD}(\pi), \quad [f]_0 = |f(0)|.$$

*The homogeneous Barron space is the function class  $\mathcal{B}(\mathbb{R}^d) = \{f : \mathbb{R}^d \rightarrow \mathbb{R} : [f]_{\mathcal{B}} < \infty\}$ . By the definition of a function  $[f]_0 < \infty$  is automatically true.*

We note a few important properties. First, we consider two function classes:

$$\begin{aligned} \mathcal{F}_Q &= \overline{\text{conv}\{a(\sigma(w \cdot x + b) - \sigma(b)) : a^2 + \|w\|^2 \leq 2Q\}} \\ \mathcal{F}_Q(R) &= \overline{\text{conv}\{a(\sigma(w \cdot x + b) - \sigma(b)) : a^2 + \|w\|^2 \leq 2Q, |b| \leq \sqrt{Q}R\}}. \end{aligned}$$

801 Note that  $\mathcal{F}_Q(R) \subseteq \mathcal{F}_Q \subseteq \{f \in \mathcal{B} : f(0) = 0, [f]_{\mathcal{B}} \leq Q\}$ . The closure is taken with respect to  
 802 locally uniform convergence, i.e. pointwise convergence which is uniform on all compact sets.<sup>1</sup> Due  
 803 to the homogeneity of ReLU activation, we may prove the following.

804 **Lemma C.2.** *The identity  $\mathcal{F}_Q = \{f \in \mathcal{B} : f(0) = 0, [f]_{\mathcal{B}} \leq Q\}$  holds.*

805 While the claim is natural, its proof is surprisingly technical and postponed until the end of the section.  
 806 The class  $\mathcal{F}_Q(R)$  will be used below for technical purposes. Of major importance below are the  
 807 compact embedding theorem and the direct approximation theorem.

808 **Theorem C.3** (Compact embedding). *Let  $f_n \in \mathcal{B}$  be a sequence such that  $\liminf_{n \rightarrow \infty} [f_n]_0 +$   
 809  $[f_n]_{\mathcal{B}} < +\infty$ . Then there exists  $f$  in  $\mathcal{B}$  such that*

- 810 1.  $f_n \rightarrow f$  in  $C^0(K)$  for all compact sets  $K \subseteq \mathbb{R}^d$ .
- 811 2.  $f_n \rightarrow f$  in  $L^p(\mu)$  for all measures  $\mu$  with finite  $p$ -th moments,  $p \in [1, \infty)$ .
- 812 3.  $[f]_{\mathcal{B}} \leq \liminf_{n \rightarrow \infty} [f_n]_{\mathcal{B}}$ .

813 *Proof.* It is sufficient to show that the set  $\tilde{\mathcal{F}}_Q = \{a(\sigma(w \cdot x + b) - \sigma(b)) \mid a^2 + |w|^2 \leq 2Q\}$  is  
 814 compact in  $C^0(K)$  and  $L^2(\mu)$  for all  $K$  and  $\mu$  as above, in which case also its closed convex hull is  
 815 compact [Rudin, 1991, Theorem 3.20.]. To this end, observe that the map

$$F : \mathbb{R} \times \mathbb{R}^d \times \mathbb{R} \rightarrow C^0(K), \quad (a, w, b) \mapsto a(\sigma(w \cdot x + b) - \sigma(b))$$

816 is continuous for any compact set  $K$ . Since  $K$  is compact, we have  $K \subseteq B_R(0)$  for some  $R > 0$  and  
 817 thus  $|w \cdot x| \leq \sqrt{2Q}R$  for all  $x \in K$ . In particular,

$$\sigma(w \cdot x + b) - \sigma(b) = \begin{cases} w \cdot x & \text{if } b > \sqrt{2Q}R \\ 0 & \text{if } b < \sqrt{2Q}R \end{cases}.$$

818 Hence  $\tilde{\mathcal{F}}_Q = F(\{(a, w, b) : a^2 + |w|^2 \leq 2Q, b \leq \sqrt{2Q}R\})$  is the continuous image of a compact  
 819 set, hence compact. We have thus proved a compact embedding into  $C^0(K)$  for any compact set  $K$ .

820 Exhausting  $\mathbb{R}^d$  by the sequence of compact sets  $\overline{B_m(0)}$ ,  $m \in \mathbb{N}$  and using a diagonal sequence  
 821 argument, we see that under the conditions of Theorem C.3, there exists  $f \in \mathcal{B}$  such that  $f_n \rightarrow f$   
 822 pointwise everywhere on  $\mathbb{R}^d$  and uniformly on compact subsets. Additionally, we observe that  
 823  $f(0) = 0$  and there exists a uniform upper bound on the Lipschitz constants of the sequence  $f_n$ .  
 824 We conclude that  $f_n \rightarrow f$  in  $L^p(\mu)$  from the Dominated Convergence Theorem using  $Q\|x\|$  as a  
 825 dominating function.  $\square$

826 As a consequence, we find the following.

827 **Corollary C.4.** 1.  $\mathcal{B}$  is a Banach space.

828 2.  $C_c^\infty(\mathbb{R}^d) \subseteq \mathcal{B}(\mathbb{R}^d)$ .

829 *Proof.* The first claim follows as in [Siegel and Xu, 2021, Lemma 1], where it is proved in a more  
 830 general context for dictionaries which are compact in a Hilbert space – in our case, the dictionary  
 831  $x \mapsto a\{\sigma(w^T x + b) - \sigma(b)\}$ . The second claim follows from [Ongie et al., 2019, Corollary 1].  $\square$

832 We conclude with a theorem which establishes a rate of approximation for Barron functions in a  
 833 weaker topology.

834 **Theorem C.5** (Direct approximation). *Let  $f \in \mathcal{B}$  and  $\mu$  a measure on  $\mathbb{R}^d$  with finite second moments.*  
 835 *Then for any  $m \in \mathbb{N}$  there exist  $c \in \mathbb{R}$  and  $(a_i, w_i, b_i) \in \mathbb{R} \times \mathbb{R}^d \times \mathbb{R}$  such that*

$$\sum_{i=1}^m a_i^2 + \|w_i\|^2 \leq [f]_{\mathcal{B}}, \quad \left\| f - c - \sum_{i=1}^m a_i \sigma(w_i^T x + b_i) \right\|_{L^2(\mu)} \leq \frac{2[f]_{\mathcal{B}}}{\sqrt{m}} \sup_{\|w\|=1} \sqrt{\int_{\mathbb{R}^d} |w^T x|^2 d\mu_x}.$$

<sup>1</sup> This notion of convergence is generated by a topology, but not a metric. Other notions of convergence can be considered and induce the same function class.

836 *Proof.* A proof of this result can be found in [Wojtowytsch, 2022, Appendix C] in the proof of  
 837 Proposition 2.6.  $\square$

838 *Proof of Lemma C.2. Step 1.* Assume that  $f \in \mathcal{B}$  such that  $f(0) = 0$  and  $[f]_{\mathcal{B}} \leq Q$ . By the Direct  
 839 Approximation Theorem (which is proved in [Wojtowytsch, 2022, Appendix C] without using Lemma  
 840 C.2), we find that for every  $m \in \mathbb{N}$  and every measure  $\mu$  on  $\mathbb{R}^d$  with finite second moments, there  
 841 exists

$$f_m(x) = \frac{1}{m} \sum_{i=1}^m a_i \{ \sigma(w_i \cdot x + b_i) - \sigma(b_i) \} \in \mathcal{F}_Q$$

842 such that  $\|f_m - f\|_{L^2(\mu)} \leq C_\mu \|f\|_{\mathcal{B}} m^{-1/2}$ . In particular,  $f$  is in the closed convex hull of  
 843  $\{a \{ \sigma(w^T x + b) - \sigma(b) \} : a^2 + |w|^2 \leq 2Q\}$  if the closure is taken with respect to the  $L^2(\mu)$   
 844 topology. Additionally, the sequence  $f_m$  has a uniformly bounded Lipschitz constant and is therefore  
 845 compact in  $C^0(K)$  for all compact  $K$  by a corollary to the Arzela-Ascoli theorem [Dobrowolski,  
 846 2010, Satz 2.42]. In particular,  $f_m \rightarrow f$  uniformly and thus  $f \in \mathcal{F}_Q$ .

847 **Step 2.** Denote  $f_{(a,w,b)}(x) = a \{ \sigma(w^T x + b) - \sigma(b) \}$ . Since  $f_{(a,w,b)}(0) = a \{ \sigma(b) - \sigma(b) \} = 0$  for  
 848 all  $a, w, b$ , we conclude that  $f(0) = 0$  for all  $f \in \mathcal{F}_Q$ . If  $f \in \mathcal{F}_Q$ , then there exists a sequence

$$f_n(x) = \sum_{i=1}^{N_n} \lambda_{i,n} a_{i,n} \{ \sigma(w_{i,n} \cdot x + b_{i,n}) - \sigma(b_{i,n}) \}$$

849 such that  $f_n \rightarrow f$  locally uniformly. If the biases remain uniformly bounded, the sequence of  
 850 empirical distributions

$$\pi_n = \frac{1}{N_n} \sum_{i=1}^{N_n} \lambda_{i,n} \delta_{(a_{i,n}, w_{i,n}, b_{i,n})}$$

851 has a convergent subsequence by Prokhorov's Theorem [Klenke, 2006, Satz 13.29]. We denote the  
 852 limiting distribution as  $\pi$ . The convergence of Radon measures implies the convergence of  $f_n$  to  
 853  $f_\pi(x) = \mathbb{E}_{(a,w,b) \sim \pi} [a \{ \sigma(w^T x + b) - \sigma(b) \}]$  by definition. Since  $f_n$  converges locally uniformly  
 854 by assumption,  $f = f_\pi \in \mathcal{B}$  and  $[f]_{\mathcal{B}} \leq Q$ .

855 If the biases do not remain bounded, we note that for every compact set  $K \subseteq \mathbb{R}^d$  we can extract a  
 856 convergent subsequence of the measures by the same argument used to prove Theorem C.3, effectively  
 857 making the sequence of biases bounded. We can extend the argument to the entire space exploiting  
 858 that

$$\lim_{b \rightarrow \infty} (\sigma(w \cdot x + b) - \sigma(b)) \rightarrow \sigma(b/|b|) w \cdot x$$

859 locally uniformly.  $\square$

## 860 D Rademacher complexity of homogeneous Barron space

861 Following a classical strategy implemented e.g. by E et al. [2019a] in a similar context, we estimate  
 862 the Rademacher complexity of homogeneous Barron space and use it to bound the generalization gap  
 863 (i.e. the discrepancy between empirical risk and population risk). In our setting, we face additional  
 864 technical obstacles:

- 865 1. We deal with general sub-Gaussian data distributions  $\mu$  rather than data distributions with  
 866 compact support.
- 867 2. We do not control the magnitude of the bias variables.
- 868 3. We consider  $\ell^2$ -loss, which is neither globally Lipschitz-continuous nor bounded.

869 In combination, these complications require a refined technical analysis similar to Appendix C. Let  
 870 us summarize several notations which will be needed below.

- 871 •  $\widehat{\text{Rad}}$  – the empirical Rademacher complexity of a function class over a given dataset.
- 872 •  $\text{Rad}_n$  – the expected Rademacher complexity of a function class over a data set composed  
 873 of  $n$  iid samples from the data distribution  $\mu$ .

- $\mathcal{R}$  – the population risk  $\mathcal{R}(f) = \|f - f^*\|_{L^2(\mu)}^2 = \mathbb{E}_{x \sim \mu} [|f(x) - f^*(x)|^2]$ . We generally take this to operate on the level of functions, parametrized or not. By an abuse of notation, we identify  $\mathcal{R}(a, W, b) := \mathcal{R}(f_{(a, W, b)})$ .
- $\widehat{\mathcal{R}}_n$  – the empirical risk  $\widehat{\mathcal{R}}_n(f) = \|f - f^*\|_{L^2(\mu_n)}^2 = \frac{1}{n} \sum_{i=1}^n |f(x_i) - f^*(x_i)|^2$  over a data set  $\{x_1, \dots, x_n\}$  where  $\mu_n = \frac{1}{n} \sum_{i=1}^n \delta_{x_i}$  is the empirical measure. Equally,  $\widehat{\mathcal{R}}_n$  can be considered for functions or parameters with the natural identification.
- $\widehat{\mathcal{R}}_{n, m, \lambda}$ . The regularized empirical risk

$$\widehat{\mathcal{R}}_{n, m, \lambda}(a, W, b) = \widehat{\mathcal{R}}_n(a, W, b) + \frac{\lambda}{2} (\|a\|^2 + \|W\|^2).$$

We only consider this quantity on the parameter level, where it is computable. While the weight decay regularizer is an upper bound for  $[f_{(a, W, b)}]_{\mathcal{B}}$ , the two are generally not the same since the parameter-to-function map of a neural network is generally not injective.

- $R_{WD}$  – the weight decay regularizer.
- $\mathcal{F}_Q$  – the set of functions for which  $[f]_{\mathcal{B}} \leq Q$  and  $f(0) = 0$ .
- $\mathcal{F}_{A, Q}$  – the set of functions for which  $[f]_{\mathcal{B}} \leq Q$  and  $|f(0)| \leq A$ .

As is common in the mathematics community,  $C$  will generally denote a constant which does not depend on quantities (unless specified otherwise) and which may change value from line to line. Some facts about sub-Gaussian distributions, which we believe to be well-known to the experts, are collected in Appendix H.

**Definition D.1** (Rademacher Complexity). *Let  $S = \{x_1, \dots, x_n\}$  be a set of points in  $\mathbb{R}^d$  (a data sample) and  $\mathcal{F}$  a real-valued function class. We define the empirical Rademacher complexity of  $\mathcal{F}$  on the data sample as*

$$\widehat{\text{Rad}}(\mathcal{F}; S) = \mathbb{E}_{\varepsilon} \left[ \sup_{f \in \mathcal{F}} \frac{1}{n} \sum_{i=1}^n \varepsilon_i f(x_i) \right]$$

where  $\varepsilon_i$  are iid random variables which take the values  $\pm 1$  with equal probability  $\frac{1}{2}$ . The population Rademacher complexity is defined as

$$\text{Rad}_n(\mathcal{F}) = \mathbb{E}_{S \sim \mu^n} [\widehat{\text{Rad}}(\mathcal{F}; S)],$$

i.e. as the expected empirical Rademacher complexity over a set of  $n$  iid data points.

In this section, we will find an upper bound of Rademacher Complexity of  $\mathcal{B}$ . We will denote by  $S_n$  the set of  $n$  samples, and  $\widehat{\text{Rad}}(\mathcal{F}, S_n)$  the sample Rademacher Complexity of  $\mathcal{F}$  given the samples  $S_n$ . We furthermore denote  $R := \max\{\|x_1\|, \dots, \|x_n\|\}$  and consider the function classes  $\mathcal{F}_Q$  and  $\mathcal{F}_Q(R)$  as in Appendix C:

$$\begin{aligned} \mathcal{F}_Q &= \overline{\text{conv}\{a(\sigma(w \cdot x + b) - \sigma(b)) : a^2 + \|w\|^2 \leq 2Q\}} \\ \mathcal{F}_Q(R) &= \overline{\text{conv}\{a(\sigma(w \cdot x + b) - \sigma(b)) : a^2 + \|w\|^2 \leq 2Q, |b| \leq \sqrt{Q}R\}}. \end{aligned}$$

**Lemma D.2.** *Let  $S_n = \{x_1, \dots, x_n\}$  be a data set in  $\mathbb{R}^d$ . Then*

$$\widehat{\text{Rad}}(\mathcal{F}_Q, S_n) \leq \frac{(1 + 3\sqrt{2})Q}{\sqrt{n}} \max_{1 \leq i \leq n} \|x_i\|.$$

Assume  $\mu$  is a  $\sigma^2$  sub-Gaussian distribution in  $\mathbb{R}^d$ . Then

$$\text{Rad}(\mathcal{F}_Q) \leq (1 + 3\sqrt{2})Q \left( \frac{\mathbb{E}_{x \sim \mu} [\|x\|]}{\sqrt{n}} + \sigma \sqrt{2 \frac{\log n}{n}} \right)$$

for all  $n \geq 2$ .

904 *Proof.* Initially, we fix a set  $S = \{x_2, \dots, x_n\}$  of  $n$  points. We will later take the expectation over  
 905  $S$ , using the sub-Gaussian property of  $\mu$  for an explicit norm bound. Define  $R := \max_{1 \leq i \leq n} \|x_i\|$ .  
 906 To this end, we first prove the following claim, which enables us to focus on only single neuron  
 907 functions instead of entire  $\mathcal{F}_Q$ :

908 **Claim:** Let  $\varepsilon_1, \dots, \varepsilon_n \in \mathbb{R}$ . Then

$$\sup_{\mathcal{F}_Q} \sum_i \varepsilon_i f(x_i) = \sup_{a^2 + \|w\|^2 \leq 2Q} \sum_i \varepsilon_i a \{ \sigma(w^T x_i + b) - \sigma(b) \}$$

909 *Proof of Claim.* Note that  $\mathcal{F}_Q$  is the closed convex hull of single neuron ridge functions, i.e. single  
 910 neuron ridge functions are the extreme points of the closed convex set  $\mathcal{F}_Q$ .

911 To verify the claim, first note that  $f \mapsto \sum_{i=1}^n \varepsilon_i f(x_i)$  is a continuous linear functional on  $C^0(K)$  for  
 912 any compact  $K \subseteq \mathbb{R}^d$  containing the finite set  $S$ . It is well known that  $C^0(K)$  is a Banach Space.  
 913 Therefore, if  $\{a(\sigma(w \cdot x + b) - \sigma(b)) \mid a^2 + \|w\|^2 \leq 2Q\}$  is compact in  $C^0(K)$ , then [Rudin, 1991,  
 914 Theorem 3.20.] implies that  $\mathcal{F}_Q$ , a closed convex hull of the compact set, is also compact. Then, from  
 915 the compactness of  $\mathcal{F}_Q$ , we can use Bauer [1958]’s maximum principle and see that the supremum  
 916 is attained at an extreme point. Compactness follows from the compact embedding Theorem, see  
 917 Theorem C.3 above.  $\square$

918 Over the next steps, we will bound  $\widehat{\text{Rad}}(\mathcal{F}_Q, S_n)$ .

919 **Step 1.** In this step, we prove that

$$\widehat{\text{Rad}}(\mathcal{F}_Q; S_n) = \widehat{\text{Rad}}(\mathcal{F}_Q(R); S_n).$$

920 To show this, we first observe that if  $|b| \geq \|w\| R$ , then  $\sigma(w \cdot x + b) - \sigma(b) = \sigma(\text{sgn}(b))w \cdot x$  since  
 921  $|w^T x_i| \leq \|w\| \|x_i\| \leq \|w\| R$  for all  $1 \leq i \leq n$ . This means for  $\forall |b| \geq \|w\| R$ , the precise value of  $b$   
 922 does not change the value of  $\sigma(w \cdot x + b) - \sigma(b)$ .

923 Now, we compute the  $\widehat{\text{Rad}}(\mathcal{F}_Q, S_n)$ :

$$\begin{aligned} n \widehat{\text{Rad}}(\mathcal{F}_Q, S_n) &= \mathbb{E}_\varepsilon \left[ \sup_{\mathcal{F}_Q} \sum_i \varepsilon_i f(x_i) \right] \\ &= \mathbb{E}_\varepsilon \left[ \sup_{a^2 + \|w\|^2 \leq 2Q} \sum_i \varepsilon_i a \{ \sigma(w \cdot x_i + b) - \sigma(b) \} \right] \\ &= \mathbb{E}_\varepsilon \left[ \sup_{a^2 + \|w\|^2 \leq 2Q, |b| \leq \|w\| R} \sum_i \varepsilon_i a \{ \sigma(w \cdot x_i + b) - \sigma(b) \} \right] \\ &= n \widehat{\text{Rad}}(\mathcal{F}_Q(R), S_n) \end{aligned}$$

924 For the first line, we used the claim.

925 **Step 2.** Using the uniform bound on the magnitude of the bias from the previous step, in this step we  
 926 bound the Rademacher complexity by

$$\widehat{\text{Rad}}(\mathcal{F}_Q; S) = \widehat{\text{Rad}}(\mathcal{F}_Q(R); S) \leq \mathbb{E}_\varepsilon \left[ \sup_{|w| \leq Q, |b| \leq QR} \left| \frac{1}{n} \sum_{i=1}^n \varepsilon_i \sigma(w \cdot x_i + b) \right| \right] + \frac{QR}{\sqrt{n}}$$

927 We verify this from the definition of Rademacher Complexity of  $\mathcal{F}_Q(R)$ . Note that  $a\sigma(wx + b) =$   
 928  $(\lambda a) \sigma((w/\lambda)x + b/\lambda)$ . In particular, we may assume without loss of generality that  $|a|^2 = \|w\|^2 \leq Q$   
 929 for optimal balance which makes  $a^2 + \|w\|^2$  minimal without changing the neuron output.

$$n \text{Rad}(\mathcal{F}_Q(R), S_n) = \mathbb{E}_\varepsilon \left[ \sup_{\mathcal{F}_Q} \sum_i \varepsilon_i f(x_i) \right]$$

$$\begin{aligned}
&= \mathbb{E}_\epsilon \left[ \sup_{a^2 + \|w\|^2 \leq Q, |b| \leq \|w\|R} \sum_{i=1}^n \epsilon_i a(\sigma(w \cdot x_i + b) - \sigma(b)) \right] \\
&\leq \mathbb{E}_\epsilon \left[ \sup_{|a|=\|w\| \leq \sqrt{Q}, |b| \leq \sqrt{QR}} \left( \left| \sum_i \epsilon_i a \sigma(w \cdot x_i + b) \right| + \left| \sum_i \epsilon_i a \sigma(b) \right| \right) \right].
\end{aligned}$$

930 In this step, we only consider the first term.:

$$\begin{aligned}
\mathbb{E}_\epsilon \left[ \sup_{|a|=\|w\| \leq \sqrt{Q}, |b| \leq \sqrt{QR}} \left| \sum_i \epsilon_i a \sigma(b) \right| \right] &\leq \mathbb{E}_\epsilon \left[ \sup_{|a| \leq \sqrt{Q}, |b| \leq \sqrt{QR}} \left| \sum_i \epsilon_i a \sigma(b) \right| \right] \\
&\leq \sup_{|a| \leq \sqrt{Q}, |b| \leq \sqrt{QR}} |a| |\sigma(b)| \mathbb{E}_\epsilon \left| \sum_i \epsilon_i \right| \leq QR \sqrt{n}.
\end{aligned}$$

931 The first line is again by applying the claim to  $\mathcal{F}_Q(R)$ . In the last line, we used two facts:

- 932 1.  $\sigma$  is ReLU, so  $|a|\sigma(b) \leq |ab| \leq \sqrt{Q} \cdot \sqrt{QR} = QR$  and  
933 2. the observation that

$$\mathbb{E}_\epsilon \left| \sum_i \epsilon_i \right| \leq \sqrt{\mathbb{E}_\epsilon \left| \sum_i \epsilon_i \right|^2} = \sqrt{\sum_{i,j=1}^n \mathbb{E}_\epsilon [\epsilon_i \epsilon_j]} = \sqrt{\sum_{i=1}^n \mathbb{E}_\epsilon [\epsilon_i^2]} = \sqrt{n}$$

934 since  $\mathbb{E}[\epsilon_i] = 0$ ,  $\epsilon_i$  and  $\epsilon_j$  are independent if  $i \neq j$  and  $\epsilon_i^2 \equiv 1$ .

935 **Step 3.** In this step, we prove that

$$\frac{1}{n} \mathbb{E}_\epsilon \left[ \sup_{|a|=\|w\| \leq \sqrt{Q}, |b| \leq \sqrt{QR}} \left| \sum_{i=1}^n \epsilon_i a \sigma(w \cdot x_i + b) \right| \right] \leq \frac{3\sqrt{2}QR}{\sqrt{n}}$$

936 To this end, we modify the data points as  $\tilde{x}_i = (x_i, R)$  and the parameters as  $\tilde{w} = (w^T, \frac{b}{R})$ . Then,  
937 observe that  $w \cdot x_i + b = \tilde{w} \cdot \tilde{x}_i$ ,  $\|\tilde{x}_i\| = \sqrt{\|x_i\|^2 + R^2} \leq \sqrt{2}R$ , and  $a^2 + \|\tilde{w}\|^2 = a^2 + \|w\|^2 + (\frac{b}{R})^2 \leq$   
938  $3Q$ . Therefore, we can write the above by the following:

$$\begin{aligned}
&\frac{1}{n} \mathbb{E}_\epsilon \left[ \sup_{a^2 + \|w\|^2 \leq Q, |b| \leq Q} \left| \sum_{i=1}^n \epsilon_i a \sigma(w \cdot x_i + b) \right| \right] \leq \frac{1}{n} \mathbb{E}_\epsilon \left[ \sup_{a^2 + \|\tilde{w}\|^2 \leq 3Q} \left| \sum_{i=1}^n \epsilon_i a \sigma(\tilde{w} \cdot \tilde{x}_i) \right| \right] \\
&= \frac{1}{n} \mathbb{E}_\epsilon \left[ \sup_{a^2 + \|\tilde{w}\|^2 \leq 3Q} |a| \|\tilde{w}\| \left| \sum_{i=1}^n \epsilon_i \sigma \left( \frac{\tilde{w}}{\|\tilde{w}\|} \cdot \tilde{x}_i \right) \right| \right] \\
&\leq \frac{1}{n} \mathbb{E}_\epsilon \left[ \sup_{a^2 + \|\tilde{w}\|^2 \leq 3Q, \|u\|_2 \leq 1} \frac{a^2 + \|\tilde{w}\|^2}{2} \left| \sum_{i=1}^n \epsilon_i \sigma(u \cdot \tilde{x}_i) \right| \right] \\
&\leq \frac{3Q}{2n} \mathbb{E}_\epsilon \left[ \sup_{\|u\|_2 \leq 1} \left| \sum_{i=1}^n \epsilon_i \sigma(u \cdot \tilde{x}_i) \right| \right] \\
&\leq \frac{3Q}{n} \mathbb{E}_\epsilon \left[ \sup_{\|u\|_2 \leq 1} \sum_{i=1}^n \epsilon_i \sigma(u \cdot \tilde{x}_i) \right] \\
&= 3Q \widehat{\text{Rad}}(\sigma \circ \mathcal{H}_2, \tilde{S}_n) \leq 3Q \widehat{\text{Rad}}(\mathcal{H}_2, \tilde{S}_n) \leq \frac{3Q}{\sqrt{n}} \max_i \|\tilde{x}_i\|_2 \leq \frac{3\sqrt{2}QR}{\sqrt{n}}
\end{aligned}$$

939 Here,  $\mathcal{H}_2 := \{u \in \mathbb{R}^d \mid \|u\|_2 \leq 1\}$  and  $\tilde{S}_n = \{\tilde{x}_1, \dots, \tilde{x}_n\}$ . When removing the absolute value, we  
940 used that the sum is always non-negative and that it is symmetric when replacing  $\epsilon$  by  $-\epsilon$ . When  
941 removing  $\sigma$ , we make use of the Contraction Lemma for Rademacher complexity [Shalev-Shwartz  
942 and Ben-David, 2014, Lemma 26.9]. Finally, for  $\text{Rad}(\mathcal{H}_2, \tilde{S}_n)$  we used the expression for the  
943 Rademacher complexity of the class of linear functions on Hilbert space. [Shalev-Shwartz and  
944 Ben-David, 2014, Lemma 26.10]. This concludes Step 3.

945 **Step 4.** In this step, we finally consider sets  $S$  which are sampled from the product measure  $\mu^n$ , i.e.  
 946 sets where  $x_1, \dots, x_n$  are independent data samples with law  $\mu$ . From steps 1 – 3, we know that

$$\text{Rad}(\mathcal{F}_Q) = \mathbb{E}_{S_n \sim \mu^n} [\widehat{\text{Rad}}(\mathcal{F}, S_n)] \leq \frac{(1 + 3\sqrt{2})Q}{\sqrt{n}} \mathbb{E}_{(x_1, \dots, x_n) \sim \mu^n} \left[ \max_{1 \leq i \leq n} \|x_i\| \right].$$

947 We bound  $\mathbb{E}_{(x_1, \dots, x_n) \sim \mu^n} [\max_{1 \leq i \leq n} \|x_i\|]$  by Lemma H.1 to obtain

$$\text{Rad}(\mathcal{F}_Q) \leq (1 + 3\sqrt{2})Q \left( \frac{\mathbb{E}_{x \sim \mu} [\|x\|]}{\sqrt{n}} + \sigma \sqrt{2 \frac{\log n}{n}} \right) \quad \square$$

948 A similar result follows immediately for the more general function class

$$\mathcal{F}_{A,Q} := \{f \in \mathcal{B} : [f]_{\mathcal{B}} \leq Q, |f(0)| \leq A\}. \quad (5)$$

949 **Corollary D.3.** *Under the same conditions as Lemma D.2, we have*

$$\text{Rad}(\mathcal{F}_{A,Q}) \leq (1 + 3\sqrt{2})Q \left( \frac{\mathbb{E}_{x \sim \mu} [\|x\|]}{\sqrt{n}} + \sigma \sqrt{2 \frac{\log n}{n}} \right) + \frac{A}{\sqrt{n}}$$

950 *Proof.* We note that  $f \in \mathcal{F}_{A,Q}$  if and only if  $f = \tilde{f} + \alpha$  with  $\tilde{f} \in \mathcal{F}_Q$  and  $|\alpha| \leq A$ . Hence, for any  
 951 fixed dataset  $S$ , we have

$$\begin{aligned} n \widehat{\text{Rad}}_n(\mathcal{F}_{A,Q}) &= \mathbb{E}_{\varepsilon} \left[ \sup_{f \in \mathcal{F}_{A,Q}} \sum_{i=1}^n \varepsilon_i f(x_i) \right] = \mathbb{E}_{\varepsilon} \left[ \sup_{f \in \mathcal{F}_Q, |\alpha| \leq A} \sum_{i=1}^n \varepsilon_i (\alpha + f(x_i)) \right] \\ &\leq \mathbb{E}_{\varepsilon} \left[ \sup_{f \in \mathcal{F}_Q} \sum_{i=1}^n \varepsilon_i f(x_i) \right] + \mathbb{E}_{\varepsilon} \left[ \sup_{|\alpha| \leq A} \sum_{i=1}^n \varepsilon_i \alpha \right] \leq \widehat{\text{Rad}}_n(\mathcal{F}_Q) + \frac{A}{\sqrt{n}} \end{aligned}$$

952 by the argument of Step 2 in the proof of Lemma D.2.  $\square$

953 A bound on the Rademacher complexity, together with the sub-Gaussian property of the distribution  
 954  $\mu$ , allows us to control the ‘generalization gap’ in homogeneous Barron spaces.

955 **Corollary D.4.** *Assume that  $\mu$  is a  $\sigma^2$ -sub-Gaussian distribution on  $\mathbb{R}^d$ . Let  $(X_1, \dots, X_n)$  be iid  
 956 random variables with law  $\mu$  and  $f^*$  a  $\mu$ -measurable function such that*

$$|f^*(x) - f^*(0)| \leq B_1 + B_2 \|x\|$$

957  $\mu$ -almost everywhere. Let

$$\widehat{\mathcal{R}}_n(f) = \frac{1}{n} \sum_{i=1}^n |f(X_i) - f^*(X_i)|^2, \quad \mathcal{R}(f) = \mathbb{E}_{x \sim \mu} [|f(x) - f^*(x)|^2].$$

958 Then with probability at least  $1 - 2\delta$  over the random draw of  $X_1, \dots, X_n$ , the bound

$$\sup_{f - f^*(0) \in \mathcal{F}_{A,Q}} (\mathcal{R}(f) - \widehat{\mathcal{R}}_n(f)) \leq C^* \left( (Q + B_2) (\mathbb{E}_{x \sim \mu} \|x\| + \sigma^2 + 1) + A + B_1 \right)^2 \frac{\log(n/\delta)}{\sqrt{n}}$$

959 holds for a constant  $C^* > 0$  which does not depend on  $\delta, Q, d, \mu$  or  $n$ .

960 *Proof. Step 1.* From Lemma H.2, with probability at least  $1 - \delta$  we have

$$\max_{1 \leq i \leq n} \|X_i\| \leq \mathbb{E}_{x \sim \mu} [\|x\|] + \sigma \sqrt{2 \log(n/\delta)}.$$

961 We denote  $R_n := \mathbb{E}_{x \sim \mu} [\|x\|] + \sigma \sqrt{2 \log(n/\delta)}$  for simplicity.

962 **Step 2.** Consider the modified loss function

$$\ell_{\xi}(f) = \min \{f^2, \xi^2\},$$

which is bounded by  $\xi^2$  and satisfies  $|\partial_f \ell_\xi| \leq 2R$ , i.e.  $\ell_\xi$  is  $2\xi$ -Lipschitz continuous. We thus observe that, with probability at least  $1 - \delta$  over the choice of random set  $S = \{x_1, \dots, x_n\}$ , we have

$$\mathbb{E}_{x \sim \mu} [\ell_\xi(f(x) - f^*(x))] - \frac{1}{n} \sum_{i=1}^n \ell_\xi(f(x_i) - f^*(x_i)) \leq 4\xi \mathbb{E}[\widehat{\text{Rad}}(\mathcal{F}_Q, S_n)] + \xi^2 \sqrt{\frac{2 \log(2/\delta)}{n}}$$

by [Shalev-Shwartz and Ben-David, 2014, Theorem 26.5] and the Contraction Lemma for Rademacher complexities, [Shalev-Shwartz and Ben-David, 2014, Lemma 26.9]. In particular

$$\begin{aligned} \mathbb{E}_{x \sim \mu} [\ell_\xi(f(x) - f^*(x))] &\leq \frac{1}{n} \sum_{i=1}^n \ell_\xi(f(x_i) - f^*(x_i)) + \xi^2 \sqrt{\frac{2 \log(2/\delta)}{n}} \\ &\quad + 4(1 + 3\sqrt{2})Q\xi \left( \frac{\mathbb{E}_{x \sim \mu} \|x\|}{\sqrt{n}} + \sigma \sqrt{\frac{2 \log n}{n}} \right) + \frac{A\xi}{\sqrt{n}}. \end{aligned}$$

**Step 3.** By the union bound, with probability at least  $1 - 2\delta$ , both the norm bound of Step 1 and the generalization bound of Step 2 hold. In the following, we assume that both bounds hold. Note that

$$|f(x) - f^*(x)| \leq |f(x) - f^*(0)| + |f^*(x) - f^*(0)| \leq (A + B_1) + (Q + B_2)\|x\|.$$

In particular, if  $\xi \geq (A + B_1) + (Q + B_2)R$ , then  $|f(x) - f^*(x)| \leq \xi$  on  $B_R(0)$ , so  $\ell_\xi(f(x) - f^*(x)) \equiv \ell(f(x) - f^*(x))$ . Applying the generalization bound with  $R_n = \mathbb{E}_{x \sim \mu} \|x\| + \sigma \sqrt{2 \log(n/\delta)}$  and  $\xi_n = (Q + B_2)R_n + (A + B_1)$ , we find that  $\ell_{\xi_n}(f(x_i) - f^*(x_i)) = \ell(f(x_i) - f^*(x_i))$  for all  $i$  by assumption and thus, with probability at least  $1 - 2\delta$ , we have

$$\begin{aligned} \mathbb{E}_{x \sim \mu} [\ell_\xi(f(x) - f^*(x))] &\leq \frac{1}{n} \sum_{i=1}^n (f(x_i) - f^*(x_i))^2 + ((Q + B_2)R_n + A + B_1)^2 \sqrt{\frac{2 \log(2/\delta)}{n}} \\ &\quad + 4(1 + 3\sqrt{2})Q((Q + B_2)R_n + A + B_1) \left( \frac{\mathbb{E}_{x \sim \mu} \|x\|}{\sqrt{n}} + \sigma \sqrt{\frac{2 \log n}{n}} \right). \end{aligned}$$

**Step 4.** Finally, we bound the population risk with the true loss function rather than  $\ell_\xi$ . Thus we find that for  $B_R := B_R(0)$  we have

$$\begin{aligned} \mathbb{E}_{x \sim \mu} [(f(x) - f^*(x))^2] &= \mathbb{E}_{x \sim \mu} [(f(x) - f^*(x))^2 1_{B_R}] + \mathbb{E}_{x \sim \mu} [(f(x) - f^*(x))^2 1_{\mathbb{R}^d \setminus B_R}] \\ &\leq \mathbb{E}_{x \sim \mu} [\ell_\xi(f(x) - f^*(x))] + \mathbb{E}_{x \sim \mu} [(A + B_1 + (Q + B_2)\|x\|)^2 1_{\mathbb{R}^d \setminus B_R}] \end{aligned}$$

for  $R \geq 3$ . From Lemma H.3 with  $R_n = \mathbb{E}\|x\| + \sigma \sqrt{2 \log(n/\delta)}$ , we have

$$\mathbb{E}_{x \sim \mu} [\|x\|^2 1_{B_{R_n}(0)^c}(x)] \leq \sqrt{2\pi} \exp\left(-\frac{\log(n/\delta)}{2}\right) \left( (\mathbb{E}\|x\|)^2 + 2\sigma^2 \right) = \sqrt{2\pi} \frac{(\mathbb{E}\|x\|)^2 + 2\sigma^2}{\sqrt{n/\delta}}.$$

976 □

**Remark D.5.** In particular, Corollary D.4 applies if the target function  $f^*$  is Lipschitz-continuous with  $B_1 = 0$  and  $B_2 = [f^*]_{\text{Lip}} \leq [f^*]_{\mathcal{B}}$ . However, continuity is not necessary, and even noisy labels would be admissible. We do not pursue this generality here.

## 980 E Proofs of the convergence theorems

In this appendix, we present the proofs of Theorems 2.1 and 3.3. In these, we combine the upper bound of the Rademacher complexity of the unit ball in homogeneous Barron space in form of the generalization bound of Corollary D.4 with a  $\Gamma$ -convergence argument (to guarantee the convergence of minimizers to minimizers). The main ingredients in the proof of  $\Gamma$ -convergence are

- 985 • the compact embedding theorem for homogeneous Barron space (to guarantee that every
- 986 subsequence of  $f_n$  has a convergent subsequence) and
- 987 • the direct approximation theorem for homogeneous Barron space (to obtain a bound on the
- 988 lowest achievable energy using a neural network with  $m$  neurons).

We first present convergence proofs in  $L^p(\mu)$  in Section E.1, followed by proofs of  $\Gamma$ -convergence in Section E.2. We combine the arguments to prove the statements from the main body of the document in Section E.3.



## 992 E.1 Convergence in $L^p(\mu)$

993 We start by establishing convergence in  $L^2(\mu)$  at an explicit convergence rate. Then, using this  $L^2(\mu)$   
 994 convergence we will extend this result to general  $L^p(\mu)$ .

995 We introduce one of our main theorem of this section, which gives us an explicit bound of  $L^2(\mu)$ -loss.  
 996 For convenience, we denote  $\theta := (a, W, b)$  for the rest of the section.

997 **Theorem E.1** ( $L^2$ -convergence). *Let  $\hat{\theta} \in \operatorname{argmin}_{\theta} \widehat{\mathcal{R}}_{n,m,\lambda}(\theta)$ . If  $\delta \geq e^{-n}$ , and  $f^* \in \mathcal{F}_{Q^*}$ , then with  
 998 probability at least  $1 - 4\delta$  over the choice of random points  $x_1, \dots, x_n$  we have*

$$\mathcal{R}(f_{\hat{\theta}}) \leq C \left( \frac{(Q^*)^2}{m} (\mathbb{E}[\|x\|^2]) + \lambda Q^* + Q^* (\mathbb{E}\|x\| + \sigma^2 + [f^*]_{\mathcal{B}}) \frac{\log(n/\delta)}{\sqrt{n}} \right)$$

999 up to higher order terms in the small quantities  $(\lambda m)^{-1}, m^{-1}, n^{-1/2} \log n$ .

1000 *Proof. Outline.* We use Theorem C.5 for  $L^2(\mu_n)$  with  $f = f^*$  to obtain a function for which  
 1001  $\widehat{\mathcal{R}}_{n,m,\lambda}$  is low. The empirical risk minimizer (ERM) has even lower risk. The weight decay penalty  
 1002 additionally provides a norm-bound in homogeneous Barron space for the ERM, and we use Corollary  
 1003 D.4 to control the generalization gap.

1004 **Step 1.** Due to Theorem C.5, there exists a  $\tilde{\theta} := (\tilde{a}, \tilde{w}, \tilde{b}) \in \mathbb{R}^m \times \mathbb{R}^{m \times d} \times \mathbb{R}^{m+1}$  such that

$$R_{WD}(\tilde{\theta}) \leq [f^*]_{\mathcal{B}} \quad (6)$$

1005 and

$$\widehat{\mathcal{R}}_n(f_{\tilde{\theta}}) = [f_{\tilde{\theta}} - f^*]_{L^2(\mu_n)}^2 \leq \frac{4[f^*]^2}{m} \sup_{\|w\|=1} \int_{\mathbb{R}^d} |w^T x|^2 d\mu_n \leq \frac{4[f^*]^2}{m} \left( \frac{1}{n} \sum_{i=1}^n \|x_i\|^2 \right).$$

1006 We will always consider  $\delta$  such that  $\log(1/\delta) \leq n$ . In this regime, plugging-in the bound on the  
 1007 second moments of  $\mu_n$  from Lemma H.4 gives the corresponding bound

$$\widehat{\mathcal{R}}_n(f_{\tilde{\theta}}) \leq \frac{4[f^*]^2}{m} \left( \mathbb{E}[\|x\|^2] + 8\sigma^2 \sqrt{\frac{\log(1/\delta)}{n}} \right) \quad (7)$$

1008 with probability  $1 - \delta$ . We will assume that this estimate is valid for the remainder of the proof. In  
 1009 particular, since  $\hat{\theta}$  minimizes  $\widehat{\mathcal{R}}_{n,m,\lambda}$ , we find that

$$\widehat{\mathcal{R}}_{n,m,\lambda}(\hat{\theta}) \leq \widehat{\mathcal{R}}_{n,m,\lambda}(\tilde{\theta}) \leq \frac{4[f^*]^2}{m} \left( \mathbb{E}[\|x\|^2] + 8\sigma^2 \sqrt{\frac{\log(1/\delta)}{n}} \right) + \lambda [f^*]_{\mathcal{B}}. \quad (8)$$

1010 **Step 2.** Next, we bound  $[f_{\hat{\theta}}]_{\mathcal{B}}$  and  $|f_{\hat{\theta}}(0) - f^*(0)|$  ( $Q$  and  $A$  in Corollary D.4). We first bound the  
 1011 Barron semi-norm by

$$[f_{\hat{\theta}}]_{\mathcal{B}} \leq \frac{1}{\lambda} \widehat{\mathcal{R}}_{n,m,\lambda}(\hat{\theta}) \leq \frac{1}{\lambda} \widehat{\mathcal{R}}_{n,m,\lambda}(\tilde{\theta}).$$

1012 Moving on to bounding  $A$ , we find from the empirical risk bound

$$\min_{1 \leq i \leq n} |f - f^*|(x_i) = \sqrt{\min_{1 \leq i \leq n} |f - f^*|^2(x_i)} \leq \sqrt{\frac{1}{n} \sum_{i=1}^n |f - f^*|(x_i)} \leq \sqrt{\widehat{\mathcal{R}}_n(f)}$$

1013 and in particular

$$\min_{1 \leq i \leq n} |f_{\hat{\theta}} - f^*|(x_i) \leq \sqrt{\widehat{\mathcal{R}}_{n,m,\lambda}(\tilde{\theta})}.$$

1014 With probability at least  $1 - \delta$ , we have

$$\max_{1 \leq i \leq n} \|x_i\| \leq \mathbb{E}_{x \sim \mu}[\|x\|] + \sigma \sqrt{2 \log(n/\delta)}.$$

1015 by Lemma H.2. Again, we assume that the estimate holds in the following. Hence, the index  $i$  for  
 1016 which the minimum is attained in (8) satisfies the bound

$$\|x_i\| \leq \mathbb{E}_{x \sim \mu}[\|x\|] + \sigma \sqrt{2 \log(n/\delta)}.$$

1017 Combining the bounds on  $|f_{\hat{\theta}}(x_i) - f^*(x_i)|$  and the Lipschitz constants of  $f_{\hat{\theta}}, f^*$ , we find that

$$\begin{aligned} |f_{\hat{\theta}} - f^*|(0) &\leq |f_{\hat{\theta}} - f^*|(x_i) + ([f_{\hat{\theta}}]_{\mathcal{B}} + [f^*]_{\mathcal{B}}) \|x_i\| \\ &\leq \sqrt{\widehat{\mathcal{R}}_{n,m,\lambda}(\tilde{\theta})} + \left( [f^*]_{\mathcal{B}} + \frac{1}{\lambda} \widehat{\mathcal{R}}_{n,m,\lambda}(\tilde{\theta}) \right) \left( \mathbb{E}_{x \sim \mu} [\|x\|] + \sigma \sqrt{2 \log(n/\delta)} \right). \end{aligned}$$

1018 **Step 3.** Comparing  $\hat{\theta}$  to  $\tilde{\theta}$ , we observe that

$$\begin{aligned} \mathcal{R}(f_{\hat{\theta}}) &= \widehat{\mathcal{R}}_n(f_{\hat{\theta}}) + \mathcal{R}(f_{\hat{\theta}}) - \widehat{\mathcal{R}}_n(f_{\hat{\theta}}) \\ &\leq \widehat{\mathcal{R}}_{n,m,\lambda}(\hat{\theta}) + \mathcal{R}(f_{\hat{\theta}}) - \widehat{\mathcal{R}}(f_{\hat{\theta}}) \\ &\leq \widehat{\mathcal{R}}_{n,m,\lambda}(\tilde{\theta}) + \mathcal{R}(f_{\hat{\theta}}) - \widehat{\mathcal{R}}_n(f_{\hat{\theta}}) \end{aligned}$$

1019 where we used the fact that  $\hat{\theta}$  is a minimizer of  $\widehat{\mathcal{R}}_{n,m,\lambda}(\theta)$  and (6). In the following, we use the  
1020 bound on  $[f_{\hat{\theta}}]_{\mathcal{B}}$  to control the generalization gap.

1021 **Step 4.** Recall that  $[f_{\hat{\theta}}]_{\mathcal{B}} \leq [f^*]_{\mathcal{B}} + \frac{1}{\lambda} \widehat{\mathcal{R}}_{n,m,\lambda}(f_{\hat{\theta}}) = [f^*]_{\mathcal{B}} + O((\lambda m)^{-1})$ . Thus, with probability  
1022 at least  $1 - 2\delta$ , we obtain the bound

$$(\mathcal{R} - \widehat{\mathcal{R}}_n)(f_{\hat{\theta}}) \leq \left( [f^*]_{\mathcal{B}} + \frac{1}{\lambda} \widehat{\mathcal{R}}_{n,m,\lambda}(\hat{\theta}) \right) (\mathbb{E}\|x\| + \sigma^2 + [f^*]_{\mathcal{B}}) \frac{\log(n/\delta)}{\sqrt{n}}$$

1023 from Corollary D.4 for a slightly modified constant  $C > 0$  (with  $B_1 = 0$ ) and up to higher order  
1024 terms in  $(\lambda m)^{-1}$  and  $n$ .

1025 **Step 5.** By the union bound, all probabilistic bounds hold simultaneously with probability at least  
1026  $1 - 4\delta$ . In this case

$$\mathcal{R}(f_{\hat{\theta}}) \leq C \left( \frac{Q^2}{m} \left( \mathbb{E}[\|x\|^2] + \sigma^2 \sqrt{\frac{\log(1/\delta)}{n}} \right) + \lambda Q + [f^*]_{\mathcal{B}} (\mathbb{E}\|x\| + \sigma^2 + [f^*]_{\mathcal{B}}) \frac{\log(n/\delta)}{\sqrt{n}} \right)$$

1027 up to higher order terms in  $m^{-1}, \log n/\sqrt{n}, (\lambda m)^{-1}$  etc.  $\square$

1028 Since  $\mathcal{R}(\theta) = \|f_{\theta} - f^*\|_{L^2(\mu)}^2$ , we can interpret Theorem E.1 as a convergence statement in  $L^2(\mu)$   
1029 at a suitable rate. The statement generalizes to  $L^p$ -convergence at a rate.

1030 **Corollary E.2** ( $L^p$ -convergence). *Let  $p \in [1, \infty]$  and  $\hat{\theta}$  as in Theorem E.1. Then there exists a*  
1031 *constant  $\tilde{C} > 0$  depending on  $\mathbb{E}\|x\|, \mathbb{E}[\|x\|^2], \sigma^2$  and  $p$  such that*

$$\|f_{\hat{\theta}} - f^*\|_{L^p(\mu)} \leq \tilde{C} \left( \widehat{\mathcal{R}}_{n,m,\lambda}(\hat{\theta})^{1/2} + [f^*]_{\mathcal{B}} \right)^{1-1/p} \|f_{\hat{\theta}} - f^*\|_{L^2(\mu)}^{1/p}.$$

1032 *Proof.* Since  $\mu$  is sub-Gaussian, we note that all moments of  $\mu$  are finite:  $\mathbb{E}[(1 + \|x\|)^q] < \infty$  for  
1033 all  $q \in [1, \infty)$ . In particular, if  $g$  is a measurable function which satisfies  $|g(x)| \leq C_g(1 + \|x\|)$  for  
1034 some  $C > 0$ , then

$$\|g\|_{L^p(\mu)}^p = \mathbb{E}[g \cdot g^{p-1}] \leq \mathbb{E}[g^2]^{1/2} \mathbb{E}[g^{2(p-1)}]^{1/2} = \|g\|_{L^2} \|g\|_{L^{2(p-1)}}^{p-1}.$$

1035 If  $g = f_{\hat{\theta}} - f^* \in \mathcal{B}$ , then by the continuous embedding  $\mathcal{B} \hookrightarrow L^q(\mu)$  we find that

$$\|f_{\hat{\theta}} - f^*\|_{L^{2(p-1)}(\mu)} \leq C (|f_{\hat{\theta}} - f^*|(0) + [f_{\hat{\theta}} - f^*]_{\mathcal{B}}).$$

1036 Recall that  $|f_{\hat{\theta}} - f^*|(0) \leq \widehat{\mathcal{R}}_{n,m,\lambda}(\hat{\theta})^{1/2} + C[f^*]_{\mathcal{B}}$ .  $\square$

1037 We note that Corollary E.2 is generally suboptimal. Indeed, for  $p \leq 2$ , the stronger bound

$$\|f_{\hat{\theta}} - f^*\|_{L^p(\mu)} \leq \|f_{\hat{\theta}} - f^*\|_{L^2(\mu)} = O \left( \left( \frac{1}{m} + \lambda + \frac{\log n}{\sqrt{n}} \right)^{1/2} \right)$$

1038 holds as  $L^2(\mu)$  embeds continuously into  $L^p(\mu)$ .

## 1039 E.2 Gamma-expansion of regularized risk functionals

1040 As before, we denote  $\theta_n = (a, W, b)_n \in \mathbb{R}^{m_n} \times \mathbb{R}^{m_n \times d} \times \mathbb{R}^{m_n+1}$ . Since  $\mathcal{R}(f_\theta) = \|f_\theta - f^*\|_{L^2(\mu)}^2$ ,  
 1041 Theorem E.1 can be taken as a statement that  $f_{\hat{\theta}_n} \rightarrow f^*$  as  $n \rightarrow \infty$  in  $L^2(\mu)$ . However, this does  
 1042 not tell us about the behavior of  $f_{\hat{\theta}_n}$  in a  $\mu$ -null set, i.e. where the distribution  $\mu$  provides us no  
 1043 information. This interpolation between known values can be deduced from our next result. We first  
 1044 present a simplified version, in which we assume that we have already taken the limits  $m, n \rightarrow \infty$   
 1045 before taking  $\lambda \rightarrow 0$ . We couple the limits  $n, m_n, \lambda_n$  below.

1046 We use the notion of  $\Gamma$ -convergence from the calculus of variations. For a brief introduction, see  
 1047 Appendix B.  $\Gamma$ -convergence depends on the underlying topology of the space, and we make the  
 1048 following convention: We say that  $f_\lambda \xrightarrow{\text{good}} f$  if  $f_\lambda \rightarrow f$  locally uniformly (uniformly on compact  
 1049 sets) and in  $L^2(\mu)$ . Other definitions are admissible and lead to the same general theory. Since  
 1050 Barron functions grow at most linearly at  $\infty$  due to Lipschitz-continuity, we note that this is notion  
 1051 of convergence is generated by a metric

$$d(f, g) = \max_{x \in \mathbb{R}^d} \frac{|f(x) - g(x)|}{1 + \|x\|^2}$$

1052 at least on bounded subsets of Barron space. This suffices for all applications below and spares us  
 1053 from considering  $\Gamma$ -convergence on more general topological spaces – which is also possible.

1054 **Theorem E.3.** *Let*

$$\mathcal{R}_\lambda : \mathcal{B} \rightarrow [0, \infty), \quad \mathcal{R}_\lambda(f) = \|f - f^*\|_{L^2(\mu)}^2 + \lambda [f]_{\mathcal{B}}.$$

1055 *We denote*

$$\begin{aligned} F_\lambda : \mathcal{B} &\rightarrow [0, \infty) & F_\lambda(f) &= \frac{\mathcal{R}_\lambda(f)}{\lambda} = \frac{\|f - f^*\|_{L^2(\mu)}^2}{\lambda} + [f]_{\mathcal{B}} \\ F : \mathcal{B} &\rightarrow [0, \infty] & F(f) &= \begin{cases} [f]_{\mathcal{B}} & \text{if } f = f^* \text{ } \mu\text{-a.e.} \\ +\infty & \text{else} \end{cases}. \end{aligned}$$

1056 *Then  $\Gamma - \lim_{\lambda \rightarrow 0} F_\lambda = F$  with respect to the notion of convergence  $\xrightarrow{\text{good}}$  defined above.*

1057 Notably, the  $\Gamma$ -limit of  $\mathcal{R}_\lambda$  itself would be zero at all points of interest. Rescaling to consider  $F_\lambda$   
 1058 instead has fits into the framework of  $\Gamma$ -expansions considered by Braides and Truskinovsky [2008].  
 1059 Denote

$$\mathcal{F} = \{f \in \mathcal{B} : f \equiv f^* \text{ } \mu\text{-a.e.}\} \quad (9)$$

1060 **Proof. Step 1. liminf-inequality.** First consider  $f \in \mathcal{F}$  and assume that  $\{f_\lambda\}_{\lambda>0}$  is a family of  
 1061 functions such that  $f_\lambda \xrightarrow{\text{good}} f$ .<sup>2</sup> Then by the compactness theorem for Barron functions in coarser  
 1062 topologies (Theorem C.3) we have the following:

$$\liminf_{\lambda \rightarrow 0^+} F_\lambda(f_\lambda) \geq \liminf_{\lambda \rightarrow 0^+} [f_\lambda]_{\mathcal{B}} \geq [f]_{\mathcal{B}} = F(f).$$

1063 Now assume that  $f \notin \mathcal{F}$  and that  $f_\lambda \xrightarrow{\text{good}} f$ . We need to show that  $F_\lambda(f_\lambda) \rightarrow +\infty$ . Since  $f \notin \mathcal{F}$ ,  
 1064 we see that  $\mathcal{R}(f) = \|f - f^*\|_{L^2(\mu)}^2 > 0$ . Denote  $\varepsilon = \sqrt{\mathcal{R}(f)}$  and observe that there exists  $\Lambda > 0$   
 1065 such that  $\|f_\lambda - f\|_{L^2(\mu)} < \varepsilon/2$  for all  $\lambda < \Lambda$  by the definition of the notion of convergence.

1066 In particular, we find that

$$\|f_\lambda - f^*\|_{L^2(\mu)} \geq \|f - f^*\|_{L^2(\mu)} - \|f_\lambda - f\|_{L^2(\mu)} \geq \varepsilon/2$$

1067 for all  $\lambda < \Lambda$  by the inverse triangle inequality and thus

$$\liminf_{\lambda \rightarrow 0^+} F_\lambda(f_\lambda) \geq \liminf_{\lambda \rightarrow 0^+} \frac{(\varepsilon/2)^2}{\lambda} = +\infty.$$

<sup>2</sup> It is easy to generalize this to continuous limits, but if preferred, then  $\lambda = \lambda_n$  can be taken to be a discrete sequence converging to zero.

1068 **Step 2. limsup-inequality.** Again, we first consider the case  $f \in \mathcal{F}$ . Set  $f_\lambda = f$  for all  $\lambda > 0$  and  
 1069 observe that  $f_\lambda \rightarrow f$  as  $\lambda \rightarrow 0^+$  (trivially). By the same argument  $F_\lambda(f_\lambda) = F(f) = [f]_{\mathcal{B}}$  for all  $\lambda$ ,  
 1070 i.e. the constant sequence is a recovery sequence since  $F_\lambda(f_\lambda) \rightarrow F(f)$ .

1071 On the other hand, if  $f \notin \mathcal{F}$ , then  $\mathcal{R}(f) > 0$  and thus  $F_\lambda(f) \rightarrow +\infty = F(f)$ . Again, we can use  
 1072 the constant sequence as a recovery sequence, somewhat trivially.  $\square$

1073 **Corollary E.4.** Assume that  $f_\lambda \in \operatorname{argmin}_{f \in \mathcal{B}} \mathcal{R}_\lambda$ , i.e.  $f_\lambda$  minimizes  $\mathcal{R}_\lambda$ . Then there exists  $\hat{f} \in \mathcal{B}$   
 1074 such that  $f_\lambda \xrightarrow{\text{good}} \hat{f}$ .

1075 *Proof.* Clearly  $f_\lambda$  minimizes  $\mathcal{R}_\lambda$  if and only if it minimizes  $F_\lambda = \lambda^{-1} \mathcal{R}_\lambda$ . We note that

$$[f_\lambda]_{\mathcal{B}} \leq \lambda^{-1} \mathcal{R}_\lambda(f_\lambda) \leq \lambda^{-1} \mathcal{R}(f^*) + [f^*]_{\mathcal{B}} = [f^*]_{\mathcal{B}}.$$

1076 In particular, by the compact embedding of Theorem C.3, there exists  $\hat{f} \in \mathcal{B}$  such that  $f_\lambda \xrightarrow{\text{good}} \hat{f}$  up  
 1077 to subsequence. By the properties of  $\Gamma$ -convergence, we conclude that  $\hat{f}$  is a minimizer of  $F$ .  $\square$

1078 We present a special case of Corollary E.4 in the setting of Proposition 3.2 which exploits the  
 1079 uniqueness of the minimizer. Recall the definition of the radial average in (3) and  $f_d^*$  from Proposition  
 1080 3.2.

1081 **Corollary E.5.** Assume that  $f^*(0) = 1$ ,  $f^*(x) = 0$  if  $\|x\| \geq 1$  and  $\mu$  satisfies the conditons  
 1082 of Theorem 3.3. Assume additionally that  $f_\lambda \in \operatorname{argmin}_{f \in \mathcal{B}} \mathcal{R}_\lambda$ , i.e.  $f_\lambda$  minimizes  $\mathcal{R}_\lambda$ . Then  
 1083  $\operatorname{Av} f_\lambda \xrightarrow{\text{good}} f_d^*$ .

1084 *Proof.* **Step 1.** Clearly  $f_\lambda$  minimizes  $\mathcal{R}_\lambda$  if and only if it minimizes  $F_\lambda = \lambda^{-1} \mathcal{R}_\lambda$ .  $\operatorname{Av} f_\lambda$  is also a  
 1085 minimizer of  $F_\lambda$  since the functional is convex and rotationally symmetric, so by averaging in radial  
 1086 direction, we are taking a (continuous) convex combination of minimizers, which is a minimizer  
 1087 again.

1088 **Step 2.** We find that

$$[\operatorname{Av} f_\lambda]_{\mathcal{B}} \leq F_\lambda(\operatorname{Av} f_\lambda) \leq F_\lambda(f_\lambda) \leq F_\lambda(f_d^*) = [f_d^*]_{\mathcal{B}}.$$

1089 By the compactness theorem for Barron functions, Theorem C.3, there exists  $f \in \mathcal{B}$  such that  
 1090  $\operatorname{Av} f_\lambda \xrightarrow{\text{good}} f$  (up to a subsequence). Since  $F_\lambda \rightarrow F$  in the sense of  $\Gamma$ -convergence, we find that  $f$   
 1091 is a minimizer of  $F$ . Since  $f$  is also radially symmetric, we find by Proposition 3.2 that  $f \equiv f_d^*$ .

1092 **Step 3.** By the exact same logic, we could show that every subsequence of  $\{\operatorname{Av} f_\lambda\}$  has a further  
 1093 subsequence which converges to  $f_d^*$ . By a standard argument in topology, the whole sequence  
 1094 converges.  $\square$

1095 A similar statement can be proved in the more complicated case where  $f_\lambda$  is a neural network with  
 1096 finitely many neurons and  $F_\lambda$  uses a finite data set rather than a continuous expectation. In this case,  
 1097 the parameter  $\lambda$  must be coupled to the number of parameters  $m$  and the number of data points  $n$ ,  
 1098 such that  $\lambda \rightarrow 0$ , but not too quickly. The proof is a more technically challenging variant of those of  
 1099 Theorem E.3 and Corollaries E.4 and E.5, which utilizes the generalization bound of D.4. To this end,  
 1100 we first introduce a new notion of convergence. That is, we define a notion of convergence from the  
 1101 parameter to function. We define a notion of convergence by saying that  $\theta_k := (a_k, W_k, b_k) \xrightarrow{\text{good}} f$   
 1102 iff  $f_{\theta_k} \xrightarrow{\text{good}} f$  as  $k \rightarrow \infty$ .

1103 **Theorem E.6.** Consider the parameter space  $\Theta_m \subseteq \mathbb{R}^m \times \mathbb{R}^{m \times d} \times \mathbb{R}^{m+1}$  of neural networks with  
 1104 a single hidden layer of width  $m$  and the associated functions

$$f_\theta(x) := b_0 + \sum_{i=1}^m a_i \sigma(w_i \cdot x + b_i)$$

1105 Let  $m_n, \lambda_n$  scale with  $n$  according to (1). We denote

$$F_n : \Theta_{m_n} \rightarrow [0, \infty) \quad F_n(\theta) = \frac{\widehat{\mathcal{R}}_{n, m_n, \lambda_n}(\theta)}{\lambda_n} = \frac{\widehat{\mathcal{R}}_n(f_\theta)}{\lambda_n} + R_{WD}(\theta)$$

$$F : \mathcal{B} \rightarrow [0, \infty] \quad F(f) = \begin{cases} [f]_{\mathcal{B}} & \text{if } f = f^* \mu\text{-a.e.} \\ +\infty & \text{else} \end{cases}.$$

1106 Then almost surely over the choice of data points, we have  $\Gamma - \lim_{n \rightarrow \infty} F_n = F$  almost surely with  
 1107 respect to the notion of convergence  $\theta_k \xrightarrow{\text{good}} f$  defined above.

1108 *Proof.* We use  $\mathcal{F}$  as in (9) throughout. In the proof we assume that all stochastic quantities in  
 1109 Corollary D.4 and Theorem E.1 are satisfied with probability at least  $1 - \delta_n$  for  $\delta_n = n^{-2}$ . The  
 1110 quantity  $\log(\delta_n)$  therefore becomes comparable to  $\log n/n \ll \lambda_n$ . Since  $\sum_{n=1}^{\infty} n^{-2} < \infty$ , we find  
 1111 that all conditions are met for all but finitely many  $n \in \mathbb{N}$  by the Borel-Cantelli Lemma. For questions  
 1112 of asymptotic convergence, we may therefore assume that the statements of both Theorems apply  
 1113 without qualifying for high probability. Note that  $n^{-2} \geq e^{-n}$  for all  $n \geq 2$  as needed for Theorem  
 1114 E.1.

1115 **Step 1. liminf-inequality.** Again, we consider the cases  $f \in \mathcal{F}$  and  $f \notin \mathcal{F}$  separately. First,  
 1116 when  $f \in \mathcal{F}$ , we apply the same method we did in Theorem E.3. For any sequence of parameters  
 1117  $\theta_n \xrightarrow{\text{good}} f$ , by Theorem C.3 the following holds:

$$\liminf_{n \rightarrow \infty} F_n(\theta_n) \geq \liminf_{n \rightarrow \infty} R_{WD}(\theta_n) \geq \liminf_{n \rightarrow \infty} [f_{\theta_n}]_{\mathcal{B}} \geq [f]_{\mathcal{B}} = F(f).$$

1118 The second inequality comes from  $[f_{\theta_n}]_{\mathcal{B}}$  being an infimum of weight decay regularizers with any  
 1119 arbitrary probability measure on parameter space.

1120 Second, when  $f \notin \mathcal{F}$ , we need to show  $\liminf_{n \rightarrow \infty} F_n(\theta_n) = \infty$  for any  $\theta_n \xrightarrow{\text{good}} f$ . We distinguish  
 1121 two prototypical cases:

- 1122 1.  $[f_{\theta_n}]_{\mathcal{B}} \rightarrow +\infty$  as  $n \rightarrow \infty$ . In this case  $F(\theta_n) \geq [f_{\theta_n}]_{\mathcal{B}} \rightarrow +\infty$  as well by the same logic  
 1123 as above.
- 1124 2.  $\limsup_{n \rightarrow \infty} [f_{\theta_n}]_{\mathcal{B}} < +\infty$ . In this case, we take  $\varepsilon := \|f - f^*\|_{L^2(\mu)}/2 > 0$ . Then there  
 1125 exists  $N \in \mathbb{N}$  such that for all  $n \geq N$  we have

$$\|f_{\theta_n} - f^*\|_{L^2(\mu)} \geq \|f - f^*\|_{L^2(\mu)} - \|f_{\theta_n} - f\|_{L^2(\mu)} \geq \varepsilon$$

1126 for all  $n \geq N$  by definition. Additionally

$$\begin{aligned} F_n(\theta_n) &\geq \frac{\widehat{\mathcal{R}}_n(f_{\theta_n}) - \mathcal{R}(f_{\theta_n})}{\lambda_n} + \frac{\mathcal{R}(f_{\theta_n})}{\lambda_n} + [f_{\theta_n}]_{\mathcal{B}} \\ &\geq \frac{\widehat{\mathcal{R}}_n(f_{\theta_n}) - \mathcal{R}(f_{\theta_n})}{\lambda_n} + \frac{\varepsilon^2}{\lambda_n} + [f_{\theta_n}]_{\mathcal{B}}. \end{aligned}$$

1127 Due to Corollary D.4 and the arguments of Theorem E.1 to control the discrepancy at 0, we  
 1128 have

$$\widehat{\mathcal{R}}_n(f_{\theta_n}) - \mathcal{R}(f_{\theta_n}) = O\left(\frac{\log n}{\sqrt{n}}\right).$$

1129 in this case. Since  $\log n/\sqrt{n} \ll \lambda_n$  by assumption, we note that

$$\lim_{n \rightarrow \infty} \frac{\widehat{\mathcal{R}}_n(f_{\theta_n}) - \mathcal{R}(f_{\theta_n})}{\lambda_n} = 0$$

1130 and thus

$$\lim_{n \rightarrow \infty} F_n(\theta_n) \geq \liminf_{n \rightarrow \infty} \left(0 + \frac{\varepsilon^2}{\lambda_n} + 0\right) = +\infty.$$

1131 The same holds in the general case by passing to subsequences.

1132 **Step 2. limsup-inequality.** As in Theorem C.5, the case  $f \notin \mathcal{F}$  follows from the lim inf-inequality in  
 1133 an essentially trivial fashion. We therefore only consider the case  $f \in \mathcal{F}$ . An approximating sequence  
 1134 in this case is constructed from Theorem C.5 as in Theorem E.1 or Theorem E.3. Namely, we find  $\tilde{\theta}_n$   
 1135 such that

$$F_n(\tilde{\theta}_n) \leq \frac{C}{\lambda_n m_n} \left(1 + \frac{\log n}{\sqrt{n}}\right) + [f^*]_{\mathcal{B}} \quad \Rightarrow \quad \limsup_{n \rightarrow \infty} F_n(\tilde{\theta}_n) \leq [f^*]_{\mathcal{B}}. \quad \square$$

**Remark E.7.** The key ingredients for the proofs of both Theorem E.1 and Theorem E.6 are Theorem C.5 and Corollary D.4, but they are combined differently. While they are paired in Theorem E.1 to obtain a precise rate, they occur separately in Theorem E.6: Theorem C.5 is used for the  $\limsup$ -inequality while Corollary D.4 enters in the proof of the  $\liminf$ -inequality. Analogously, the condition  $\lambda_n \ll \log n / \sqrt{n}$  is used in the proof of the  $\liminf$ -condition while the fact that  $\frac{1}{m_n} \ll \lambda_n$  is used in the proof of the  $\limsup$ -inequality.

### E.3 Proofs of the main theorems

The statements of the Theorems in the main body of the text can easily be deduced from the statements proved in this Appendix.

*Proof of Theorem 2.1.* Convergence in  $L^p$  holds by Theorem E.1 for  $1 \leq p \leq 2$  and Corollary E.2 (general  $p$ ). The proof of uniform convergence follows from Theorem E.6 in the same fashion that Corollary E.4 follows from Theorem E.3. The explicit bound is obtained from Theorem E.1 with  $\delta_n = \frac{1}{4n^2}$ .  $\square$

*Proof of Theorem 3.3.* This follows in the same way as the proof of Theorem 2.1 with modifications as in Corollary E.5.  $\square$

## F Theorem 2.1 for finite data sets

Finally, we note that a version of Theorem 2.1 holds if the data set  $S = \{x_1, \dots, x_n\}$  is kept fixed. The proof is a combination of those of Theorems E.3 and E.6, as we deal with a finite approximating neural network, but do not require generalization bounds. The details are left to the reader.

**Theorem F.1.** We make the following assumptions.

1. Let  $S = \{(x_1, y_1), \dots, (x_n, y_n)\}$  be a fixed dataset of  $n$  data points in  $x_i \in \mathbb{R}^d$  and labels  $y_i \in \mathbb{R}$ .
2. Let the loss function  $\ell(f, y)$  be the mean squared error  $\ell_{MSE}(f, y) = |f - y|^2$ .
3. Assume that  $\lambda_m$  is a sequence of parameters such that  $\lambda_m \rightarrow 0$ ,  $1/m \ll \lambda_m$  as  $m \rightarrow \infty$ .

Consider the regularized empirical risk functional  $\widehat{\mathcal{R}}_m : \mathbb{R}^m \times \mathbb{R}^{m \times d} \times \mathbb{R}^m \rightarrow [0, \infty)$ ,

$$\widehat{\mathcal{R}}_m(a, W, b) = \frac{1}{2n} \sum_{i=1}^n \ell(f_{(a, W, b)}(x_i), y_i) + \frac{\lambda_m}{2} (\|a\|_2^2 + \|W\|_{Frob}^2).$$

Then if  $(a, W, b)_m \in \operatorname{argmin} \widehat{\mathcal{R}}_m$  for all  $m \in \mathbb{N}$ , then every subsequence of  $f_m := f_{(a, W, b)_m}$  has a further subsequence which converges to some limit  $\hat{f}^* \in \mathcal{B}$  uniformly on compact subset of  $\mathbb{R}^d$ . The limiting function satisfies

$$\hat{f}^* \in \operatorname{argmin}_{\{f \in \mathcal{B} : f(x_i) = y_i \ \forall i\}} [f]_{\mathcal{B}}.$$

## G Minimum norm interpolation in one dimension

*Proof of Proposition 3.1.* Any Barron function  $f$  is also Lipschitz-continuous, in particular differentiable almost everywhere and  $f(b) - f(a) = \int_a^b f'(x) dx$  for all  $a, b \in \mathbb{R}$  by Rademacher's Theorem (see e.g. [Evans and Gariepy, 2015, Section 3.1]). In particular, there exist points  $x^+, x^- \in (a, b)$  such that

$$f'(x^-) \leq \frac{f(b) - f(a)}{b - a} = \frac{1}{b - a} \int_a^b f'(x) dx \leq f'(x^+).$$

If  $f'$  is not constant, both inequalities are satisfied strictly. Under the assumptions, there exists  $a \in (x_0, x_1)$  and  $b \in (x_{n-1}, x_n)$  such that

$$f'(a) \leq \frac{f(x_1) - f(x_0)}{x_1 - x_0} \leq 0 \leq \frac{f(x_n) - f(x_{n-1})}{x_n - x_{n-1}} \leq f'(b). \quad (10)$$

1171 Since the derivative  $f'$  changes sign, we conclude by [Wojtowysch, 2022, Proposition 2.5] that  
 1172  $[f]_{\mathcal{B}} = \int_{-\infty}^{\infty} d|\mu|$  where the Radon measure  $\mu$  is the distributional derivative of  $f'$  and  $|\mu|$  denotes  
 1173 the total variation measure of  $\mu$ . Since  $f'$  is differentiable at  $a, b$ , neither point is an atom of  $\mu$  and  
 1174 thus

$$\frac{f(x_n) - f(x_{n-1})}{x_n - x_{n-1}} - \frac{f(x_1) - f(x_0)}{x_1 - x_0} \leq f'(b) - f'(a) \leq \int_a^b d\mu \leq \int_a^b d|\mu| \leq [f]_{\mathcal{B}}.$$

1175 Equality holds if and only if  $|\mu| = \mu$ , i.e. if  $\mu \geq 0$  in the sense of signed measures and if and only  
 1176 if the inequality in (10) can only be satisfied with equality. The first condition means that  $f$  must  
 1177 be convex, the second implies that the derivative of  $f$  must be constant in the intervals  $(x_0, x_1)$  and  
 1178  $(x_{n-1}, x_n)$ . The same can easily be seen for the larger intervals  $(-\infty, x_1)$  and  $(x_{n-1}, \infty)$ .  $\square$

## 1179 H Sub-Gaussian random variables

1180 In this Appendix we quickly gather some facts about sub-Gaussian random variables. For the reader's  
 1181 convenience, we provide full proofs. Experts are encouraged to skip ahead to Appendix D.

1182 The first property we observe is a bound of expected maximum value of sub-Gaussian.

1183 **Lemma H.1.** *Let  $\mu$  be  $\sigma^2$ -sub-Gaussian, and for  $i = 1, \dots, n$ , let  $x_i$  be a iid random samples from*  
 1184 *a law  $\mu$ . Then, the following holds:*

$$\mathbb{E} \left[ \max_{1 \leq i \leq n} \|x_i\| \right] \leq \mathbb{E}_{x \sim \mu} [\|x\|] + \sqrt{2 \log n} \sigma.$$

1185 *Proof.* From the sub-Gaussian assumption we have

$$\log \left( \mathbb{E}_{x \sim \mu} \left[ \exp \left( \lambda (\|X\| - \mathbb{E}[\|X\|]) \right) \right] \right) \leq \frac{\sigma^2 \lambda^2}{2}$$

1186 for some fixed  $\sigma > 0$  and all  $\lambda > 0$ . In particular, Jensen's inequality implies the sub-Gaussian  
 1187 maximal inequality

$$\begin{aligned} \mathbb{E} \left[ \max_{1 \leq i \leq n} \|x_i\| \right] &= \mathbb{E}_{x \sim \mu} [\|x\|] + \mathbb{E} \left[ \max_{1 \leq i \leq n} (\|x_i\| - \mathbb{E}[\|x_i\|]) \right] \\ &\leq \mathbb{E}_{x \sim \mu} [\|x\|] + \frac{1}{\lambda} \log \left( \mathbb{E} \left[ \exp \left( \lambda \max_{1 \leq i \leq n} (\|x_i\| - \mathbb{E}[\|x_i\|]) \right) \right] \right) \\ &\leq \mathbb{E}_{x \sim \mu} [\|x\|] + \frac{1}{\lambda} \log \left( \mathbb{E} \left[ \sum_{i=1}^n \exp (\lambda (\|x_i\| - \mathbb{E}[\|x_i\|])) \right] \right) \\ &\leq \mathbb{E}_{x \sim \mu} [\|x\|] + \frac{1}{\lambda} \log \left( \sum_{i=1}^n \mathbb{E} [\exp (\lambda (\|x_i\| - \mathbb{E}[\|x_i\|]))] \right) \\ &= \mathbb{E}_{x \sim \mu} [\|x\|] + \frac{1}{\lambda} \log \left( n \exp \left( \frac{\lambda^2 \sigma^2}{2} \right) \right) \\ &\leq \mathbb{E}_{x \sim \mu} [\|x\|] + \frac{\log n}{\lambda} + \frac{\sigma^2}{2} \lambda \end{aligned}$$

1188 for all  $\lambda > 0$ . We specifically select  $\lambda = \sqrt{\frac{2 \log n}{\sigma^2}}$ , making the bound

$$\mathbb{E} \left[ \max_{1 \leq i \leq n} \|x_i\| \right] \leq \mathbb{E}_{x \sim \mu} [\|x\|] + \sqrt{2 \log n} \sigma. \quad \square$$

1189 Next, we observe the concentration of maximum values among samples of sub-Gaussian distribution.

1190 **Lemma H.2.** *Let  $\mu$  be  $\sigma^2$ -sub-Gaussian, and for  $i = 1, \dots, n$ , let  $x_i$  be a iid random samples from*  
 1191 *a law  $\mu$ . Then, with probability at least  $1 - \delta$ , the following holds:*

$$\max_{1 \leq i \leq n} \|x_i\| \leq \mathbb{E}_{x \sim \mu} [\|x\|] + \sigma \sqrt{2 \log(n/\delta)}.$$

1192 *Proof.* For all  $t > 0$ , we observe that

$$\begin{aligned}
\mu^n \left( \max_{1 \leq i \leq n} \|x_i\| \geq \mathbb{E}_{x \sim \mu} [\|x\|] + t \right) &= \mu^n \left( \max_{1 \leq i \leq n} \exp(\lambda(\|x_i\| - \mathbb{E}\|x_i\|)) \geq \exp(\lambda t) \right) \\
&\leq e^{-\lambda t} \mathbb{E} \left[ \max_{1 \leq i \leq n} \exp((\lambda(\|x_i\| - \mathbb{E}\|x_i\|))) \right] \\
&\leq e^{-\lambda t} \sum_{i=1}^n \mathbb{E} \left[ \exp((\lambda(\|x_i\| - \mathbb{E}\|x_i\|))) \right] \\
&\leq n \exp \left( -\lambda t + \frac{\lambda^2 \sigma^2}{2} \right).
\end{aligned}$$

1193 For fixed  $t$ , the bound becomes tightest for  $\lambda = t/\sigma^2$  with

$$\mu^n \left( \max_{1 \leq i \leq n} \|x_i\| \geq \mathbb{E}_{x \sim \mu} [\|x\|] + t \right) \leq n \exp \left( -\frac{t^2}{2\sigma^2} \right) \leq \delta$$

1194 if

$$-\frac{t^2}{2\sigma^2} \leq \log \left( \frac{\delta}{n} \right) \quad \Leftrightarrow \quad t \geq \sigma \sqrt{2 \log(n/\delta)}.$$

1195 Thus with probability at least  $1 - \delta$ , we have

$$\max_{1 \leq i \leq n} \|X_i\| \leq R_n := \mathbb{E}_{x \sim \mu} [\|x\|] + \sigma \sqrt{2 \log(n/\delta)}. \quad \square$$

1196 In the following Lemma, we investigate expectation of squared norm of sub-Gaussian near the tail.

1197 **Lemma H.3.** Let  $\mu$  be  $\sigma^2$ -sub-Gaussian distribution in  $\mathbb{R}^d$ . For any  $R > \mathbb{E}_{x \sim \mu} \|x\|$ , we have the  
1198 following:

$$\mathbb{E}_{x \sim \mu} [\|x\|^2 1_{B_R(0)^c}(x)] \leq \exp \left( -\frac{(R - \mathbb{E}\|x\|)^2}{4\sigma^2} \right) \sqrt{2\pi} \left( (\mathbb{E}\|x\|)^2 + 2\sigma^2 \right).$$

1199 *Proof.* Recall that

$$\mu \left( \{x : \|x\| \geq (\mathbb{E}_{x' \sim \mu} \|x'\| + t)\} \right) \leq \exp \left( -\frac{t^2}{2\sigma^2} \right)$$

1200 as demonstrated in the proof of Lemma H.1 (consider  $n = 1$ ). Thus

$$\begin{aligned}
\mathbb{E}_{x \sim \mu} [\|x\|^2 1_{B_R(0)^c}(x)] &\leq \int_R^\infty s^2 \mu(\{\|x\| \geq s\}) \, ds \leq \int_R^\infty s^2 \exp \left( -\frac{(s - \mathbb{E}\|x\|)^2}{2\sigma^2} \right) \, ds \\
&\leq \exp \left( -\frac{(R - \mathbb{E}\|x\|)^2}{4\sigma^2} \right) \int_R^\infty \exp \left( -\frac{(s - \mathbb{E}\|x\|)^2}{4\sigma^2} \right) \, ds \\
&\leq \exp \left( -\frac{(R - \mathbb{E}\|x\|)^2}{4\sigma^2} \right) \int_R^\infty \exp \left( -\frac{(s - \mathbb{E}\|x\|)^2}{4\sigma^2} \right) \, ds \\
&= \exp \left( -\frac{(R - \mathbb{E}\|x\|)^2}{4\sigma^2} \right) \sqrt{2\pi} \left( (\mathbb{E}\|x\|)^2 + 2\sigma^2 \right).
\end{aligned}$$

1201 □

1202 In next Lemma we introduce how the mean of squared norm of sub-Gaussian is concentrated.

1203 **Lemma H.4.** Assume  $\mu$  is a  $\sigma^2$ -sub-Gaussian distribution in  $\mathbb{R}^d$ . Let  $x_1, \dots, x_n$  be iid random  
1204 samples from law  $\mu$ . Then, with probability at least  $1 - \delta$ ,

$$\frac{1}{n} \sum_{i=1}^n \|x_i\|^2 \leq \mathbb{E}_{x \sim \mu} [\|x\|^2] + 8\sigma^2 \max \left( \frac{\log(1/\delta)}{n}, \sqrt{\frac{\log(1/\delta)}{n}} \right).$$



1205 In particular, if  $\delta \geq e^{-n}$  then

$$\frac{1}{n} \sum_{i=1}^n \|x_i\|^2 \leq \mathbb{E}[\|x\|^2] + 8\sigma^2 \sqrt{\frac{\log(1/\delta)}{n}}$$

1206 with probability at least  $1 - \delta$ .

1207 *Proof.* Firstly since  $\|x_i\|$  is  $\sigma^2$ -sub-Gaussian, from [Honorio and Jaakkola, 2014, Appendix B] we  
 1208 observe that  $\|x_i\|^2$  is  $(4\sqrt{2}\sigma^2, 4\sigma^2)$ -sub-exponential. Next, by independence, for all  $\lambda > 0$  and for  
 1209 all  $|t| \leq \frac{1}{4\sigma^2}$  we have the following:

$$\begin{aligned} \mathbb{E} \left[ \exp \left( \lambda \left( \sum_{i=1}^n \|x_i\|^2 - \mathbb{E} \left[ \sum_{i=1}^n \|x_i\|^2 \right] \right) \right) \right] &= \prod_{i=1}^n \mathbb{E} \left[ \exp \left( \lambda (\|x_i\|^2 - \mathbb{E}[\|x_i\|^2]) \right) \right] \\ &\leq \prod_{i=1}^n \exp \left( \frac{32\sigma^4 \lambda^2}{2} \right) \\ &= \exp \left( \frac{32n\sigma^4 \lambda^2}{2} \right) \end{aligned}$$

1210 which implies that  $\sum_{i=1}^n \|x_i\|^2$  is  $(4\sqrt{2}n\sigma^2, 4\sigma^2)$ -sub-exponential. Thus the tail bound of sub-  
 1211 exponential [Adams, 2022, Proposition 2.38] applied to  $\sum_{i=1}^n \|x_i\|^2$  yields

$$\mu^n \left( \left| \sum_{i=1}^n \|x_i\|^2 - \mathbb{E} \left[ \sum_{i=1}^n \|x_i\|^2 \right] \right| \geq s \right) \leq \exp \left( -\frac{1}{2} \min \left( \frac{s^2}{32n\sigma^4}, \frac{s}{4\sigma^2} \right) \right)$$

1212 Plugging-in  $s = nt$ , we have the following:

$$\mu^n \left( \left| \frac{1}{n} \sum_{i=1}^n \|x_i\|^2 - \mathbb{E}_{x \sim \mu} \|x\|^2 \right| \geq t \right) \leq \exp \left( -\frac{1}{2} n \min \left( \frac{t^2}{32\sigma^4}, \frac{t}{4\sigma^2} \right) \right)$$

1213 Lastly, take  $\delta = \exp \left( -\frac{1}{2} n \min \left( \frac{t^2}{32\sigma^4}, \frac{t}{4\sigma^2} \right) \right)$ . By rearranging the  $t$  with respect to  $\delta$ , we have the  
 1214 following:

$$\mu^n \left( \left| \frac{1}{n} \sum_{i=1}^n \|x_i\|^2 - \mathbb{E}_{x \sim \mu} \|x\|^2 \right| \geq 8\sigma^2 \max \left( \sqrt{\frac{\log(1/\delta)}{n}}, \frac{\log(1/\delta)}{n} \right) \right) \leq \delta.$$

1215 This proves the first part of the Lemma. Specifically, we have the following:

$$\begin{aligned} \mu^n \left( \left| \frac{1}{n} \sum_{i=1}^n \|x_i\|^2 - \mathbb{E}_{x \sim \mu} \|x\|^2 \right| \geq 8\sigma^2 \frac{\log(1/\delta)}{n} \right) &\leq \delta \quad \text{if } \delta \leq e^{-n} \\ \mu^n \left( \left| \frac{1}{n} \sum_{i=1}^n \|x_i\|^2 - \mathbb{E}_{x \sim \mu} \|x\|^2 \right| \geq 8\sigma^2 \sqrt{\frac{\log(1/\delta)}{n}} \right) &\leq \delta \quad \text{if } \delta \geq e^{-n} \end{aligned}$$

1216 The second inequality proves the last part of the Lemma. □
