# Supplementary material
Source: ML conference proceedings conference paper supplement (https://openreview.net/forum?id=MlrFYNo1yc)
Supplement: supplementary_material [file attachment]

## 495 Appendix

|     |                                                            |           |
|-----|------------------------------------------------------------|-----------|
| 496 | <b>A Numerical Experiments</b>                             | <b>14</b> |
| 497 | <b>B <math>\Gamma</math>-convergence</b>                   | <b>22</b> |
| 498 | <b>C Homogeneous Barron spaces</b>                         | <b>24</b> |
| 499 | <b>D Rademacher complexity of homogeneous Barron space</b> | <b>27</b> |
| 500 | <b>E Proofs of the convergence theorems</b>                | <b>32</b> |
| 501 | <b>F Theorem 2.1 for finite data sets</b>                  | <b>38</b> |
| 502 | <b>G Minimum norm interpolation in one dimension</b>       | <b>38</b> |
| 503 | <b>H Sub-Gaussian random variables</b>                     | <b>39</b> |

## 504 A Numerical Experiments

### 505 A.1 Hyperparameter settings and computation effort

506 In all experiments in Dimensions 3 and 15, the following hyperparameter settings were used unless  
507 otherwise indicated:

- 508 1. Normal Xavier initialization with gain  $\alpha = \sqrt{2}$
- 509 2. SGD: Learning rate =  $10^{-2}$  (Dimension 15),  $10^{-3}$  (Dimension 3).
- 510 3. Momentum-SGD: Learning rate =  $10^{-3}$  and momentum  $\mu = 0.99$
- 511 4. ADAM: Learning rate =  $10^{-3}$  and PyTorch default hyperparameters for  $\beta_1 = 0.9, \beta_2 =$   
512  $0.999, \varepsilon = 10^{-8}$ .

513 For experiments in Dimension 31, we drop the learning rate for ADAM after 50 of 150 epochs by a  
514 factor of 10 and for Momentum-SGD by a factor of 10 after 100 epochs.

515 In Dimension 3, a learning rate of  $10^{-2}$  was found numerically unstable for SGD without momentum.  
516 To compensate for the smaller learning rate and provide a fair comparison, the number of time steps  
517 was increased.

518 All experiments were performed on a free version of google colab or the experimenters' personal  
519 computers. One run of the model takes below fifteen minutes on a single graphics processing unit.

### 520 A.2 Summary and interpretation of additional simulations

521 In this Section, we present additional numerical experiments in various situations complementary  
522 to those presented in the main body of the text. These include: Wider neural networks (Appendix  
523 A.3), experiments with different optimizers (Appendix A.4), experiments with different initialization  
524 to explore effects of scale and symmetry and the role of explicit regularization (Appendices A.8  
525 and A.5), experiments with  $\ell^1$ -loss instead of  $\ell^2$ -loss (Appendix A.7) and repeated experiments to  
526 visualize the stochastic variation between runs (Appendix A.6).

527 Additionally, we present an investigation into related settings where our theoretical understanding  
528 does not apply: In Appendix A.10, we consider linearized (random feature) dynamics to explore  
529 how close we are to a (truly non-linear) neural network model. In Appendix A.11, we consider  
530 neural networks with a single hidden layer and leaky ReLU activation instead of ReLU activation. In  
531 Appendix A.12 we consider ReLU networks with multiple hidden layers. For a detailed list, see the  
532 table of contents below.

|     |                                                                                             |    |
|-----|---------------------------------------------------------------------------------------------|----|
| 533 | <b>A.3 Wide neural networks in one dimension</b>                                            | 15 |
| 534 | <b>A.4 SGD and ADAM: Dimensions 3 and 15</b>                                                | 15 |
| 535 | <b>A.5 Radial symmetry in Dimension 31</b>                                                  | 15 |
| 536 | <b>A.6 Gradient descent with Momentum</b>                                                   | 17 |
| 537 | <b>A.7 <math>\ell^1</math>-loss and Huber loss</b>                                          | 17 |
| 538 | <b>A.8 Initialization scaling and explicit regularization: high-dimensional radial data</b> | 18 |
| 539 | <b>A.9 He initialization</b>                                                                | 18 |
| 540 | <b>A.10 Linearized dynamics</b>                                                             | 19 |
| 541 | <b>A.11 Leaky ReLU activation</b>                                                           | 21 |
| 542 | <b>A.12 Deeper neural networks</b>                                                          | 21 |

Our goal is not to explore questions of loss function, initialization, optimization algorithm and the impact of hyperparameters in a systematic fashion, but rather to establish problems in which a minimum norm interpolant can be found in an explicit fashion as instructive benchmarks to numerically study such questions. As a proof of concept, we provide a partial exploration of the parameter space. For the moment, we find ourselves confined to ReLU networks with a single hidden layer, as this is the only case in which explicit minimum norm interpolants are available. Minimum norm interpolation describes the shape of functions between known data clusters and is thus more expressive than a study of generalization error which is naturally confined to data clusters.

The additional experiments corroborate our findings in the main text. Before the detailed presentation, let us briefly summarize the conclusions.

1. Across a variety of different optimizers, Xavier type (= Glorot type) initialization schemes and loss functions, a minimum Barron norm interpolant-like shape was attained, to varying degrees of accuracy and with different rescaling factors.
2. Solutions are fairly radially symmetric with standard deviation in radial direction at most 0.1 (SGD) and 0.2 (Adam).
3. A geometrically distinct shape is observed for random feature models in the same regime.
4. Explicit regularization has little effect, even for poorly chosen initializations of Xavier type with high gain. We conjecture that the uniqueness of the radially symmetric minimum norm interpolant induces a higher degree of rigidity and bias, compared to the one-dimensional case where the set of minimum norm solutions was diverse (and infinite).
5. Functions display larger variation in the radial direction for He initialization. In this regime, explicit regularization has more apparent and beneficial effects on both solution shape and radial symmetry. The solution does not reduce to the random feature model in this case either.

### **A.3 Wide neural networks in one dimension**

In Figure 5, we present the same experiment as in Figure 2 for wider neural networks with  $m = 1,000$  neurons in the hidden layer.

### **A.4 SGD and ADAM: Dimensions 3 and 15**

We repeat the experiment on Figure 3 for Stochastic Gradient Descent (SGD) optimizer without momentum and for the Adam optimizer of [Kingma and Ba [2014]]. The results are displayed in Figure 6 and 7 respectively. The results strongly resemble those obtained for the SGD optimizer with momentum in Figure 3.

### **A.5 Radial symmetry in Dimension 31**

As indicated in Figure 4, we present computational results with the radially symmetric normal Xavier initialization in Figure 8.

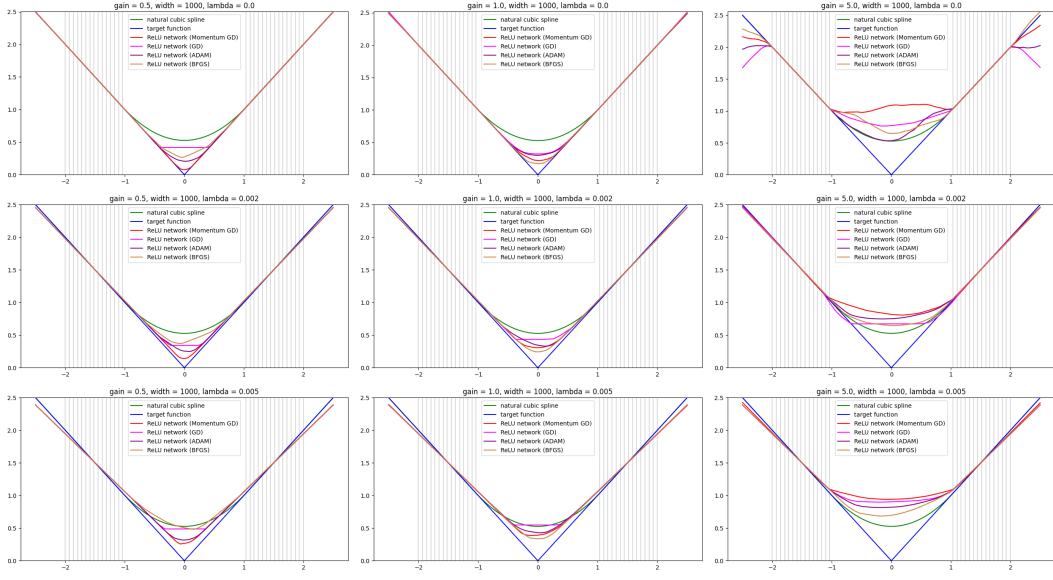

Figure 5: For wider neural networks, we observe less stochastic variation between runs, as the empirical distribution of neurons is closer to a continuum limit. Solutions are generally more convex and symmetric than their narrow counterparts. The gradient descent optimizer without momentum stands out for its tendency to select solutions with highly localized second derivatives and a preference for piecewise linear functions with few linear regions, while other training algorithms select ‘smoother’ solutions with curvatures which are dispersed more evenly throughout the domain.

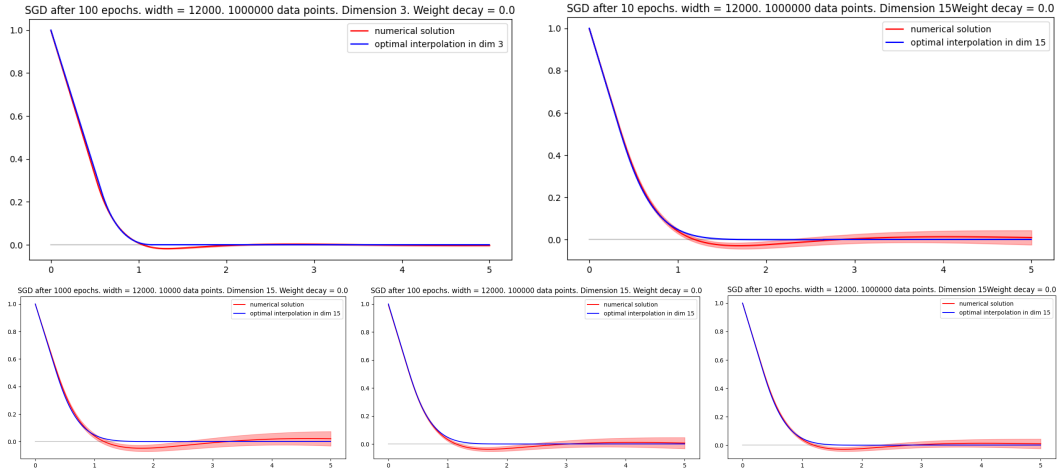

Figure 6: We perform the same experiments as for Figure 3, but with the SGD without momentum optimizer. Learning rate was adjusted to  $10^{-2}$  for dimension 15, but for dimension 3 we just used  $10^{-3}$  learning rate and ran 10 times more epochs, due to stability of neural network training in dimension 3 case. The results are comparable, but the rescaling factors were chosen as  $1/1.15$  in dimension 3 and  $1/2.65$  in dimension 15.

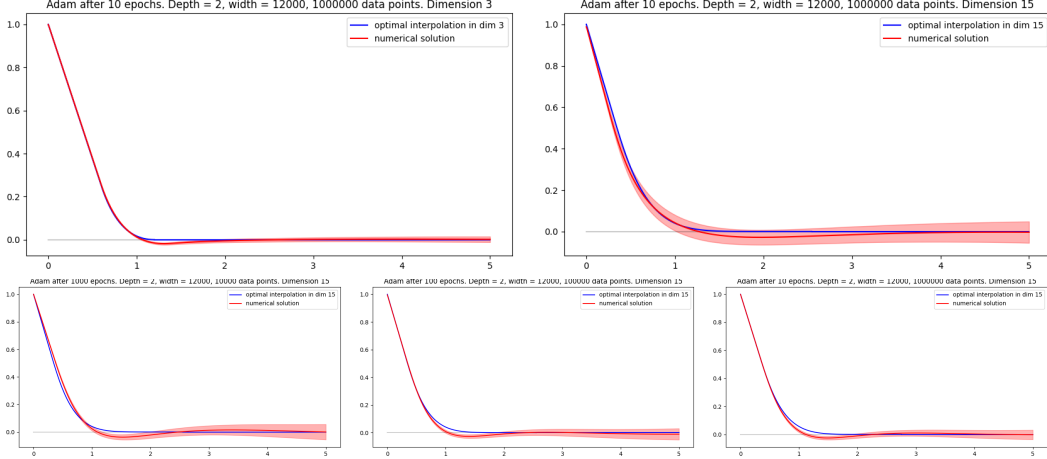

Figure 7: We repeat the experiments of Figure 3 but with Adam. The numerical solutions resemble those found by Momentum-SGD, but better rescaling factors for numerical solutions are  $1/1.2$  in dimension 3 and  $1/2.75$  rather than  $1/1.05$  and  $1/2.55$ , i.e. the functions are ‘flatter’.

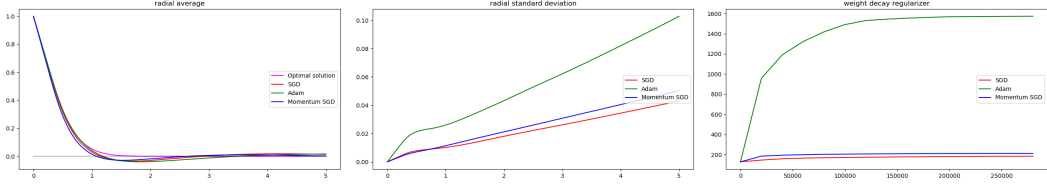

Figure 8: Results between normal and uniform Xavier initialization are essentially identical in this experiment – compare Figure 4. (Approximate) radial symmetry is attained even when parameters are initialized in a fashion which is not radially symmetric.

## 578 A.6 Gradient descent with Momentum

579 In Figure 9, we present additional runs in the setting of Figure 3. Despite quantitative variation,  
 580 the geometric shapes of solutions are stable over multiple runs and resemble the minimum norm  
 581 interpolant  $f_{15}^*$  in all cases.

## 582 A.7 $\ell^1$ -loss and Huber loss

583 We repeat the experiment of Figure 3 with the  $\ell^1$ -loss function in the place of  $\ell^2$ -loss. To compensate  
 584 for the lack of smoothness in the loss function, we reduce the learning rate by a factor of 10 to  $10^{-4}$   
 585 and increase the number of epochs by 50% to compensate. Results are reported in Figure 10.

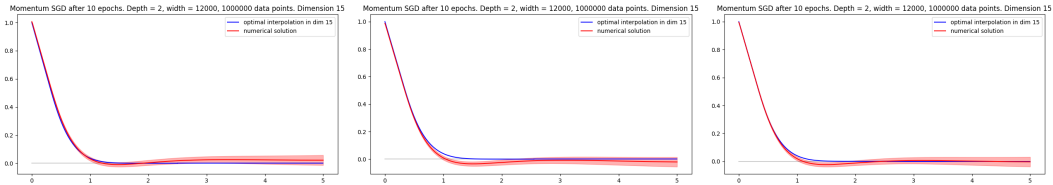

Figure 9: Three realizations of numerical interpolations in the setting of Section 5.2, computed by SGD with learning rate  $\eta = 10^{-3}$  and momentum  $\mu = 0.99$ . In all cases, the minimum norm interpolant shape is attained approximately, but the radial averages briefly dip below zero and exhibit a local minimum which is not found in  $f_d^*$ . The variation between runs is notable, but not large.

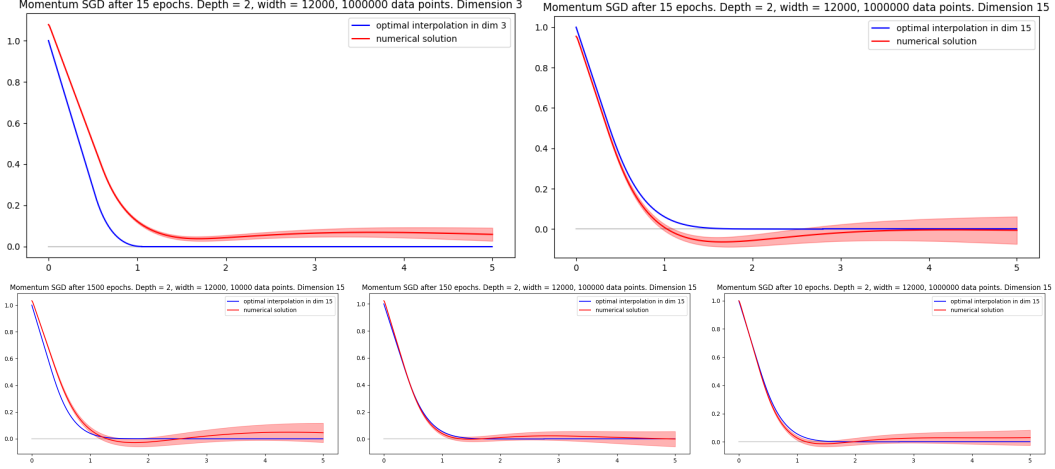

Figure 10:  $\ell^1$ -loss leads to similar numerical results with a smaller rescaling factor of  $1/2.8$  rather than  $1/2.5$  for  $\ell^2$ -loss. Curiously,  $f(0) > 1$  for these algorithms, while  $f(0) \leq 1$  when optimizing  $\ell^2$ -loss. In Dimension  $d = 3$ , the non-smoothness leads to a minimization problem that is not well resolved by the numerical optimization algorithm.

Similarly, we repeated experiments with the Huber loss function. Since  $|f(x_i) - f^*(x_i)| < 1$  over the data set during the final stages of training, the loss function coincides with  $\ell^2$ -loss in the long run and all experiments are identical to  $\ell^2$ -loss. We therefore do not present additional plots.

In the initial stages of training, Huber loss is more stable numerically than  $\ell^2$ -loss, especially for large gain or He initialization (compare Section A.9).

#### A.8 Initialization scaling and explicit regularization: high-dimensional radial data

As noted in Section 5.1 and previously by Chizat et al. [2019], the choice of initialization affects the optimization process of neural networks. Motivated by our observations in the one-dimensional case, we consider the effects of initialization and explicit regularization in the radially symmetric setting (Section 5.2). Our results support the earlier claim that the effects of regularization are advantageous for poorly chosen initialization with high gain.

The experiments were performed in higher dimension 31 and with *uniform* Xavier initialization for the scenario in which it is most challenging to obtain radially symmetric solutions. As in Appendix A.7 we used  $\ell^1$ -loss rather than  $\ell^2$ -loss. To compensate for the non-smoothness of the loss function, we drop the learning rate by a factor of 10 twice during the training process. Similar results were observed for  $\ell^2$ -loss, but the effects of initialization and regularization were less pronounced compared to the  $\ell^1$ -case.

Plots for a single representative run are displayed in Figure 11. The explicit regularizer has the clearest effect in the high gain regime, where explicit regularization helps to achieve a better fit with the optimal transition curve and reduces the radial standard variation. Results were less sensitive to poor initialization than the corresponding experiments in one dimension. We conjecture that a higher degree of rigidity is introduced in this setting by the fact that there exists a *unique* minimum norm interpolant.

#### A.9 He initialization

All experiments so far were performed with the initialization scaling of Glorot and Bengio [2010]. Especially for deeper neural networks, the initialization scheme of He et al. [2015] is very popular. Hanin and Rolnick [2018] proves in particular that He et al. [2015]’s normalization avoids the vanishing and exploding gradients phenomenon at initialization in expectation. While this consideration does not apply to our shallow networks, we find it informative to compare the two schemes.

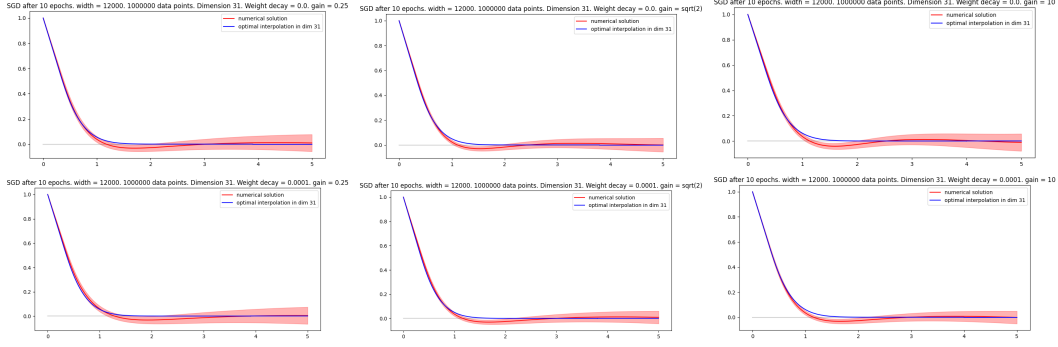

Figure 11: We vary initialization scale ( $\alpha \in \{0.25, \sqrt{2}, 10\}$  from left to right) and consider training without weight decay (top row) and with weight decay  $\lambda = 10^{-4}$  (bottom row). The rescaling factors are chosen to be  $1/3.9$  for  $\alpha = 0.25$ ,  $1/3.8$  for  $\alpha = \sqrt{2}$ , and  $1/4$  for  $\alpha = 10$ .

For shallow neural networks

$$f_m : \mathbb{R}^d \rightarrow \mathbb{R}, f_m(x) = \sum_{i=1}^m a_i \sigma(w_i \cdot x + b_i)$$

the effect of initialization is as follows:

1. According to [Glorot and Bengio \[2010\]](#), the parameters  $a_i$  and  $w_{ij}$ ,  $1 \leq i \leq m$  and  $1 \leq j \leq d$  are chosen as random variables with mean 0 and standard deviation  $\sqrt{2/(m+1)}$  for  $a_i$  and  $\sqrt{2/(m+d)}$  for  $w_{ij}$ . In particular, if  $m$  is much larger than  $d$ , then the  $|a_i| \|w_i\| = O(1/m)$ . As we add  $m$  terms of magnitude  $\sim 1/m$ , we consider this the ‘law of large numbers’ scaling.
2. According to [He et al. \[2015\]](#), the parameters  $a_i$  and  $w_{ij}$ ,  $1 \leq i \leq m$  and  $1 \leq j \leq d$  are chosen as random variables with mean 0 and standard deviation  $\sqrt{2/m}$  for  $a_i$  and  $\sqrt{2/d}$  for  $w_{ij}$ . In particular, if  $m$  is much larger than  $d$ , then the  $|a_i| \|w_i\| = O(1/\sqrt{m})$ . As we add  $m$  terms of mean zero and magnitude  $\sim 1/\sqrt{m}$ , we consider this the ‘central limit theorem’ scaling.

Many authors, such as [Sirignano and Spiliopoulos \[2020a, b, 2019\]](#), present the factor  $1/m$  or  $1/\sqrt{m}$  explicitly outside the neural network. As observed above, the effect of initialization can be significant. Unsurprisingly, results in the central limit regime, where all neurons contribute similarly at initialization, are more consistent and predictable. Experimental results are presented in Figure 12 in the one-dimensional setting and in Figures 13 and 14 in the case of radial symmetry. Notably, in high dimension, explicit regularization not only reduced radial variation, but also increased data compliance by reducing the rescaling factor  $r_d$ . In this setting, we observe the benefits of explicit regularization over relying on implicit bias only.

## A.10 Linearized dynamics

Parameter optimization in neural networks depends heavily on the choice of initialization. While the dynamics are truly non-linear in the regime studied by [Chizat and Bach \[2018\]](#), [Rotskoff and Vanden-Eijnden \[2018\]](#), [Mei et al. \[2018\]](#), [Sirignano and Spiliopoulos \[2020a\]](#) and [Wojtowysch \[2020\]](#), there are scalings for which the directions  $w_i$  remain close to their initialization for all time – see e.g. [E et al. \[2019b\]](#) for a derivation. In this case, the solution produced by a neural network is similar to that of a random feature model. In this section, we numerically find the minimum norm interpolant of a random feature model by ‘freezing’ the inner layer coefficients at their random initialization. We find that the random feature solution differs geometrically from the Barron space solution, e.g. in that it is smooth at the origin, where the Barron space solution has a cone-like singularity of the form  $f(x) = 1 - c_d \|x\|_2$  for small  $x$ . In particular, we find that our experiments were set appropriately in the non-linear training regime. See Figure 15.

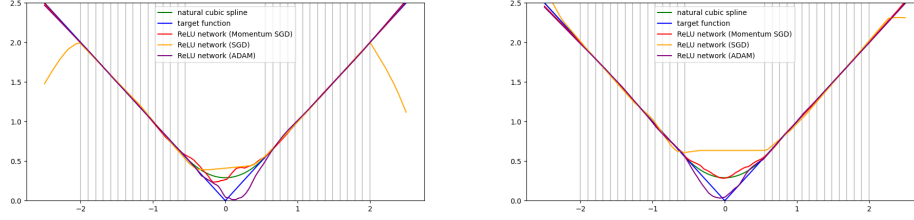

Figure 12: Experiments for He initialization in one Dimension in the same setting as Figure 2 with Xavier initialization. Left: No explicit regularization, right: Weight decay regularization  $\lambda = 0.002$ . Even for Glorot initialization with large gain, this regularizer was sufficient to induce convexity. For He initialization, it has a notable regularizing effect, but it is insufficient to impose convexity. We observe greater deviation from a linear function in the small intervals between known data points on either side of the big ‘gap’.

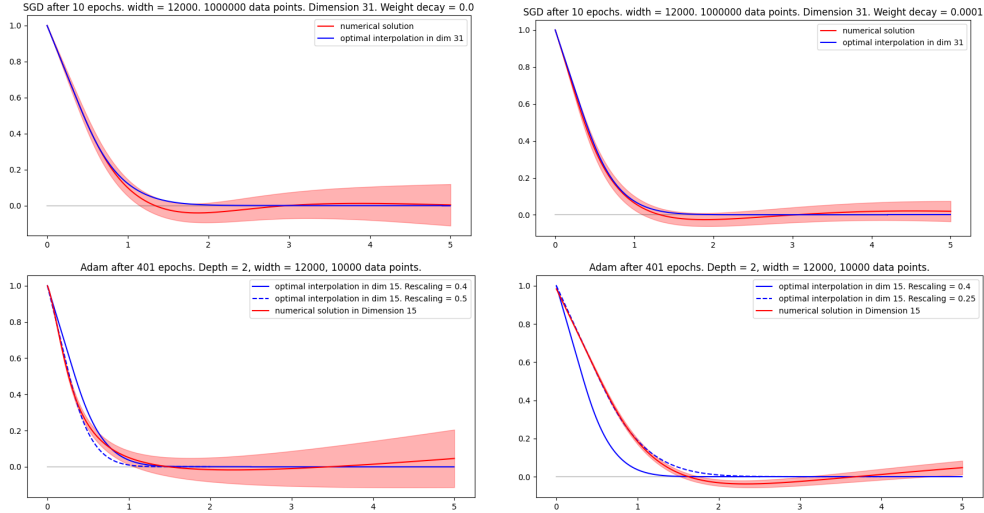

Figure 13: **Top row:** Experiments for He initialization in dimension 31 in the same setting as Appendix A.8. **Left:** No explicit regularization with a rescaling factor  $r_d = 1/4.9$ , **Right:** Weight decay regularization with  $\lambda = 10^{-4}$  and rescaling factor  $r_d = 1/4.2$ . We observe that under He initialization the effects of the explicit regularizer is even more pronounced. Unlike in other experiments, the presence of regularization *increases* the rescaling factor and thus improves the fit to training data (for the radial profile).

**Bottom row:** We repeat the same as above with MSE loss rather than  $\ell^1$ -loss, using the Adam optimizer with learning rate  $10^{-5}$  instead of SGD with momentum, and using an overparametrized rather than underparametrized neural network. Without explicit regularization (left), the radial standard deviation is substantial, while explicit regularization leads to a more radially symmetric function, albeit at the price of a higher rescaling factor. For easy comparison to Figure 3, we present the optimal profile as rescaled in the main document as well. Both functions achieve training loss  $< 10^{-3}$ , but clearly generalization is poor without regularization: While the radial average is close to the target function  $f^* \equiv 0$  for inputs with  $\|x\| \geq 1$ , the radial variation is high.

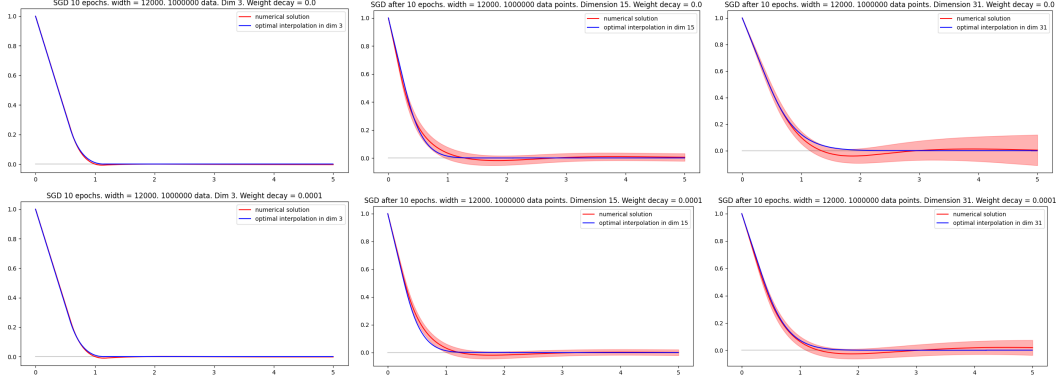

Figure 14: We examine the effects of the explicit regularizer (weight decay penalty  $\lambda = 0$  for the top row and  $\lambda = 10^{-4}$  for the bottom row) while varying dimensions ( $d = 3, 15, 31$  from left to right) in the He initialization scheme. Optimizer settings were identical to the top row in Figure 13. The rescaling factors were  $r_3 = 1/1.15$ ,  $r_{15} = 1/2.1$ , and  $r_{31} = 1/4.2$ . As dimension grows implicit bias may be insufficient to find a minimum norm interpolant shape with reasonable scaling factor and may not enforce radial symmetry. In this case explicit regularizer may have an advantage.

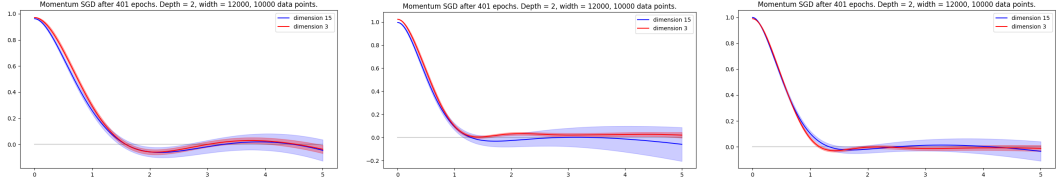

Figure 15: A random feature model trained on the same dataset as the neural networks. The solutions produced this way are geometrically distinct from neural network solutions as they are ‘flat’ at the origin. The left two figures correspond to different initializations: Gain  $\alpha = \sqrt{2}$  (left) and gain  $\alpha = 5$  (right). Notably, the variation is higher in radial direction in high dimension and higher than for the comparable neural network model. Perhaps surprisingly, higher gain appears to induce a better implicit bias in this case. No explicit regularization was used. Here we initialized the random feature by the same law as the neural network rather than initializing the outer layer at zero, since our goal is to study neural network dynamics, not find the optimal random feature solution. For the right plot, the initialization was random normal with gain 5 in the inner layer and zero in the outer layer with unsurprisingly better results.

#### 647 A.11 Leaky ReLU activation

648 As noted by Wojtowysch [2022], minimum norm interpolation is not stable when passing to an  
 649 equivalent norm. A Barron space theory can be developed in perfect analogy for networks with the  
 650 leaky ReLU activation function, and it is easy to see that the ‘Barron’ spaces for both activation  
 651 functions coincide with equivalent norms, depending on the negative slope of the leaky ReLU  
 652 function. However, the minimum norm interpolant  $f_d^*$  with respect to the ReLU-based Barron-norm  
 653 is not guaranteed to coincide with the minimum interpolant for the leaky-ReLU-based Barron norm.  
 654 Experimentally, however, we observe strong agreement between the geometry of numerical solutions  
 655 here.

#### 656 A.12 Deeper neural networks

657 We train neural networks of depth  $L > 2$  to fit the same radially symmetric data as in Section 5.2  
 658 We see in Figure 17 that for depth  $L \geq 3$ , weight decay-regularized networks strongly resemble the  
 659 interpolant  $f_{Lip}(x) = \max\{1 - \|x\|_2, 0\}$  with minimal (Euclidean) Lipschitz constant. This function  
 660 can be written as a composition of two Barron functions  $f = f_{bump} \circ f_{norm}$

$$f_{bump}(z) = \max\{1 - z, 0\} = \sigma(1 - z), \quad f_{norm}(x) = \|x\|_2 = c_d \mathbb{E}_{\nu \sim \pi^0} [\sigma(\nu \cdot x)]$$



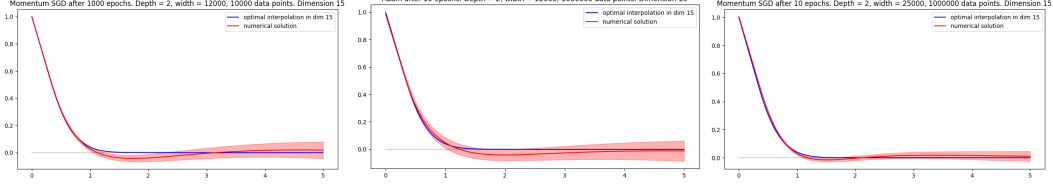

Figure 16: Neural networks with a single hidden layer and leaky ReLU activation  $\sigma(z) = \max\{z, 0\} + 0.1 \min\{z, 0\}$  trained in the setting of Section 5.2. Without theoretical foundation, we observe that the shape of  $f_d^*$  is attained to high accuracy also in this setting with the same rescaling factors as in the ReLU setting. **Left:** Momentum-SGD, **Middle:** Adam, **Right:** Momentum-SGD for a wider network with  $m = 25,000$ .

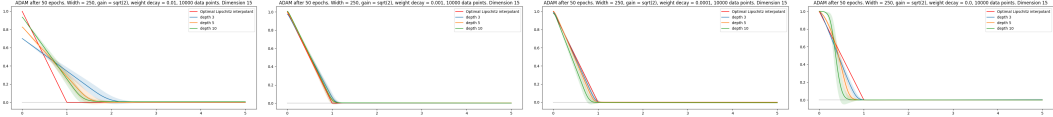

Figure 17: Neural networks of width 250 and varying depth were trained to fit data generated as in Section 5.2 with weight decay regularizers  $10^{-2}$ ,  $10^{-3}$ ,  $10^{-4}$  and 0 (left to right). The initialization gain variable was chosen as  $\alpha = \sqrt{2}$  as required to avoid exploding and vanishing gradients in deeper networks. Evidently, a small amount of weight decay regularization provides useful geometric prior without diminishing the quality of data fit.

Unlike networks with one hidden layer, deeper networks have positive (or nearly positive) outputs everywhere. While two-layer networks follow the minimum norm interpolation shape closely by the origin and have radial variances which increase outside the unit ball, deeper networks have positive radial variance inside the unit ball, but are essentially radially symmetric outside – compare e.g. Figure 9.

where  $\pi^0$  denotes the uniform distribution on the unit sphere and  $c_d \sim \sqrt{d}$  is a dimension-dependent constant. We can thus approximate  $f_{Lip}$  efficiently by neural networks of depth  $L \geq 3$  as long as the first layer is sufficiently wide.

Unlike their shallow counterparts, neural networks with multiple hidden layers have no strong geometric prior without weight decay regularization. With weight decay, the observed behavior was relatively stable over a range of dimensions, initializations scalings and optimization algorithms. We are led to conjecture that  $f_{Lip}$  is a minimum norm interpolant in this setting. The statement remains imprecise at this point as no function space theory for deeper networks with weight decay regularizer has been developed to the same extent as Barron space theory.

## B $\Gamma$ -convergence

In this appendix, we recall the definition and a few properties of  $\Gamma$ -convergence, a popular notion of the convergence of functionals introduced by De Giorgi and Franzoni [1975] in the calculus of variations to study the convergence of minimization problems. Braides [2002], Dal Maso [2012] provide introductions to the theory and its applications. As the notion is likely not familiar to readers from the machine learning community, we provide some full proofs as well.

**Definition B.1.** Let  $(X, d)$  be a metric space and  $F_n, F : X \rightarrow \mathbb{R} \cup \{-\infty, \infty\}$  be functions. We say that  $F_n$  converges to  $F$  in the sense of  $\Gamma$ -convergence if two conditions are met:

1. (lim inf-inequality) If  $x_n$  is a sequence in  $X$  and  $x_n \rightarrow x$ , then  $\liminf_{n \rightarrow \infty} F_n(x_n) \geq F(x)$ .
2. (lim sup-inequality) For every  $x \in X$ , there exists a sequence  $x_n^* \in X$  such that  $x_n^* \rightarrow x$  and  $\limsup_{n \rightarrow \infty} F_n(x_n^*) \leq F(x)$ .

Intuitively, the first condition means that  $F(x)$  is (almost) a lower bound for  $F_n(x_n)$  if  $n$  is ‘large’ and  $x_n$  is ‘close’ to  $x$ , while the second condition means that there is no larger lower bound that we could choose. The sequence  $x_n^*$  is often referred to as a ‘recovery sequence’. Of course,

combining the liminf- and limsup-inequalities, we find that in fact  $F_n(x_n^*) \rightarrow F(x)$ . We employ  $\Gamma$ -convergence when dealing with minimization problems where uniform convergence fails, but we hope for convergence of minimizers to minimizers.

Often,  $\Gamma$ -convergence is considered as a continuous parameter  $\varepsilon$  approaches  $0^+$  rather than as the discrete parameter  $n$  approaches infinity. The definitions remain largely identical (with obvious substitutions).

To get a feeling for  $\Gamma$ -convergence, we consider a particularly simple situation by looking at two constant sequences of functions. Note that the sequence is constant, not the functions.

**Example B.2.** Let  $X = \mathbb{R}$  and consider the constant sequences

$$F_n(x) = f(x) = \begin{cases} 1 & x \neq 0 \\ 0 & x = 0 \end{cases}, \quad G_n(x) = g(x) = \begin{cases} 0 & x \neq 0 \\ 1 & x = 0 \end{cases}.$$

We claim that

$$(\Gamma - \lim_{n \rightarrow \infty} F_n)(x) = f(x), \quad (\Gamma - \lim_{n \rightarrow \infty} G_n)(x) = 0 \quad \forall x \in \mathbb{R}.$$

If  $x_n \rightarrow x$  and  $x \neq 0$ , then  $F_n(x_n) = 1$  and  $G_n(x_n) = 0$  for all but finitely many  $n \in \mathbb{N}$ , meaning that  $F_n(x_n) \rightarrow 1 = f(x)$  and  $G_n(x_n) \rightarrow 0$ . It remains to consider the case  $x_n \rightarrow 0$ .

We see immediately that  $F_n(x_n) \geq 0 = f(0)$  for all  $n \in \mathbb{N}$ . Conversely, if we take  $x_n^* = 0$  for all  $n$ , then  $x_n^* \rightarrow 0$  and  $F_n(x_n^*) = f(0) \rightarrow f(0)$ . In total, we conclude that  $\Gamma - \lim F_n = f$ .

For  $G_n$ , we find that  $G_n(x_n) \geq 0$  for all  $n \in \mathbb{N}$ . Additionally, we can choose the sequence  $x_n = 1/n$  such that  $G_n(x_n) = 0$  for all  $n \in \mathbb{N}$ . Altogether, we find that  $\Gamma - \lim G_n = 0$ .

More generally, if  $F_n = F$  for all  $n \in \mathbb{N}$  and some  $F : X \rightarrow \mathbb{R}$ , then  $\Gamma - \lim_{n \rightarrow \infty} F_n = \bar{F}$  is the lower semi-continuous envelope of  $F$ . In particular,  $\Gamma - \lim_{n \rightarrow \infty} F = F$  if and only if  $F$  is lower semi-continuous. The main useful properties of  $\Gamma$ -convergence are summarized in the following lemma.

**Lemma B.3.** Assume that  $F_n \rightarrow F$  in the sense of  $\Gamma$ -convergence,  $\varepsilon_n \rightarrow 0^+$  and  $x_n \in X$  is a sequence such that

$$F_n(x_n) \leq \inf_{x \in X} F_n(x) + \varepsilon_n.$$

Assume that  $x_n \rightarrow x^*$ . Then  $F(x^*) = \inf_{x \in X} F(x)$ . In particular, if  $x_n$  is a minimizer of  $F_n$  and the sequence  $x_n$  converges, then the limit point is a minimizer of  $F$ .

Clearly, this is most useful if we can guarantee that the sequence  $x_n$  converges. For many useful sequences of functionals, the existence of a convergent subsequence can be established by compactness. This is easily sufficient, as we can also pass to a subsequence in  $F_n$ .

*Proof.* Due to the liminf-inequality, we have

$$F(x^*) \leq \liminf_{n \rightarrow \infty} F_n(x_n) = \liminf_{n \rightarrow \infty} \inf_{x \in X} F_n(x).$$

On the other hand, let  $x \in X$  be any point. Then, due to the limsup-inequality, there exists some sequence  $x'_n$  such that

$$x'_n \rightarrow x, \quad F(x) = \lim_{n \rightarrow \infty} F_n(x'_n) \geq \liminf_{n \rightarrow \infty} \inf_{x \in X} F_n(x).$$

In particular  $\inf_{x \in X} F(x) \geq \liminf_{n \rightarrow \infty} \inf_{x \in X} F_n(x)$ . Combining the two estimates, we find that  $F(x^*) \leq \inf_{x \in X} F(x)$ , which means that  $x^*$  is a minimizer of  $F$ .  $\square$

For completeness, a few observations are in order.

1. The notion of  $\Gamma$ -convergence relies on the notion of convergence on the underlying space  $X$ , and  $\Gamma$ -limits can change when keeping the set  $X$  fixed, but passing to a different topology (e.g. a weak topology in infinite-dimensional spaces).
2.  $\Gamma$ -convergence is made for minimization problems, and it does not behave well under multiplication by negative real numbers: In general  $\Gamma - \lim(-F_n) \neq -(\Gamma - \lim F_n)$ , even if both limits exist. The reason is the asymmetry between the lim inf- and the lim sup-condition. To see this, consider for instance  $F_n$  and  $G_n - 1$  in Example [B.2](#).

724 3. If  $F_n \rightarrow F$  and  $G_n \rightarrow G$ , it is not necessarily true that  $F_n + G_n \rightarrow F + G$ . While it  
725 remains true that  $\liminf_{n \rightarrow \infty} (F_n + G_n)(x_n) \geq (F + G)(x)$  if  $x_n \rightarrow x$ , it may no longer  
726 be possible to find a recovery sequence  $x_n$  for  $F_n + G_n$ . For example, if  $F_n = 1_{\mathbb{Q}}$  and  
727  $G_n = 1_{\mathbb{R} \setminus \mathbb{Q}}$  for all  $n \in \mathbb{N}$ , then  $F_n \xrightarrow{\Gamma} 0$  and  $G_n \xrightarrow{\Gamma} 0$ , but  $F_n + G_n = 1$  for all  $n$  and  
728  $F_n + G_n \xrightarrow{\Gamma} 1$ .

729 However, if  $F_n \xrightarrow{\Gamma} F$  and  $G_n$  converges to a *continuous* limit  $G$  *uniformly*, then  $(F_n +$   
730  $G_n) \xrightarrow{\Gamma} F + G$ . In particular, uniform convergence implies  $\Gamma$ -convergence. Namely, if  
731  $G_n \rightarrow G$  uniformly,  $G$  is continuous and  $x_n \rightarrow x$ , then for given  $\varepsilon > 0$ , we can choose  
732  $N \in \mathbb{N}$  so large that

- 733 (a)  $|G(x_n) - G(x)| < \varepsilon/2$  for all  $n \geq N$  since  $G$  is continuous at  $x$  and  
734 (b)  $|G_n(x_n) - G(x_n)| < \varepsilon/2$  for all  $n \geq N$  due to uniform convergence.

735 Then

$$|G_n(x_n) - G(x)| \leq |G_n(x_n) - G(x_n)| + |G(x_n) - G(x)| < \varepsilon.$$

736 In particular  $G_n(x_n) \rightarrow G(x)$ . Recall that  $G$  is guaranteed to be continuous if  $G_n$  is  
737 continuous for all  $n \in \mathbb{N}$ .

- 738 4.  $\Gamma$ -convergence is unrelated to pointwise convergence of functions: Neither does it imply  
739 pointwise convergence, nor is it implied by it. Namely, the sequence  $G_n$  in Example [B.2](#)  
740 has the function  $g$  as a pointwise limit and the constant function 0 as a  $\Gamma$ -limit.
- 741 5.  $\Gamma$ -convergence is not a notion of convergence derived from a topology. Indeed, even if  $F_n$  is  
742 a constant sequence, i.e. if  $F_n = G$  for all  $n$ , it may happen that  $\Gamma - \lim_{n \rightarrow \infty} F_n \neq G$  (see  
743  $G_n$  in Example [B.2](#)). The  $\Gamma$ -limit is related to  $G$ , though: It is the lower semi-continuous  
744 envelope of the function  $G$ . In fact, every  $\Gamma$ -limit is lower semi-continuous.

745 Despite its somewhat counterintuitive properties,  $\Gamma$ -convergence has proved invaluable in many areas  
746 of the calculus of variations. It has been applied to homogenization by [Bach et al. \[2021\]](#), dimension  
747 reduction for thin sheets and shells by [Friedecke et al. \[2002a, 2003, 2002b\]](#), [Bhattacharya et al. \[2016\]](#),  
748 [Lewicka et al. \[2010\]](#) and the study of phase boundaries by [Modica and Mortola \[1977\]](#),  
749 [Modica \[1987\]](#). While the  $\Gamma$ -convergence of functionals does not imply the convergence of their  
750 gradient flows even in situations of practical significance (see e.g. the example of [Dondl et al. \[2019\]](#)),  
751 [Serfaty \[2011\]](#), [Sandier and Serfaty \[2004\]](#), [Mugnai and Röger \[2011\]](#), [Ilmanen \[1993\]](#), [Alikakos](#)  
752 [et al. \[1994\]](#) provide important examples of situations where this can be established in a suitable  
753 sense. Even more, [Bronsard and Kohn \[1990\]](#) use  $\Gamma$ -convergence to gain insight into PDE dynamics.

## 754 C Homogeneous Barron spaces

755 In this section, we introduce the abstract framework which is used to prove our main theoretical  
756 result, Theorem [3.3](#). A neural network with  $m$  neurons in a single hidden layer can be represented as

$$f_m(x) = b_0 + \sum_{i=1}^m a_i \sigma(w_i^T x + b_i) \quad \text{or} \quad f_m(x) = b_0 + \frac{1}{m} \sum_{i=1}^m a_i \sigma(w_i^T x + b_i). \quad (4)$$

757 The network weights and biases are  $(a, W, b) \in \mathbb{R}^m \times \mathbb{R}^{m \times d} \times \mathbb{R}^{m+1}$ . The normalization depends  
758 on personal preference, with the former being more common in practice and the latter more common  
759 in theoretic analyses. We define the weight decay regularizer by

$$R_{WD}(a, W, b) = \frac{\|a\|_{\ell^2}^2 + \|W\|_F^2}{2} = \frac{1}{2} \left( \sum_{i=1}^m a_i^2 + \sum_{i=1}^m \sum_{j=1}^d w_{ij}^2 \right)$$

760 or  $R_{WD}(a, W, b) = \frac{1}{2m} \sum_{i=1}^m (a_i^2 + \|w_i\|_{\ell^2}^2)$  respectively. Here  $\|\cdot\|_2$  denotes the Euclidean  $\ell^2$ -norm  
761 of a vector and  $\|W\|_F$  denotes the Frobenius norm of the matrix  $W$  whose rows are the vectors  $w_i^T$ .  
762 Note that we do not control the magnitude of the biases  $b_i$  in the regularizer. This is a common  
763 approach, as the bias does not influence the Lipschitz-constant of the function represented by the  
764 neural network, which is useful in studying the generalization of the neural network.

We study function classes corresponding to arbitrarily wide neural networks with a single hidden layer, where the norm corresponds to the weight decay regularizer. We dub these function spaces ‘homogeneous Barron spaces’ in analogy to the more classical Barron spaces studied by [E et al. (2019c)], [Ma et al. (2020)], [E and Wojtowytsch (2020)], which correspond to a weight decay regularizer which also controls the bias. For homogeneous Barron spaces, coordinate transformations by Euclidean motions induce an isometry of the function class, while the origin plays a special role in classical Barron spaces. This justifies our terminology, as the data space is treated as isotropic and homogeneous by this function class. Homogeneous Barron spaces have also been studied by [Ongie et al. (2019)], [Parhi and Nowak (2021, 2022)] under the name Radon-BV spaces. A closely related class of spaces has been considered as the ‘variation spaces of the ReLU dictionary’ by [Siegel and Xu (2020, 2022, 2023)].

Heuristically, (homogeneous) Barron spaces are a function class tailored to replacing the finite superposition of ReLU ridges in (4) by an arbitrary superposition while keeping the weight decay regularizer finite. Due to the lack of control over the bias term, we will see that a slightly awkward technical definition is needed. Let  $\pi$  be a probability distribution on the parameter space  $\mathbb{R} \times \mathbb{R}^d \times \mathbb{R}$ . We would like to define

$$f_{\pi, b_0} : \mathbb{R}^d \rightarrow \mathbb{R}, \quad f_{\pi, b_0}(x) = b_0 + \mathbb{E}_{(a, w, b) \sim \pi} [a \sigma(w^T x + b)] = \int_{\mathbb{R} \times \mathbb{R}^d \times \mathbb{R}} a \sigma(w^T x + b) d\pi_{(a, w, b)}$$

and

$$R_{WD}(\pi) = \frac{1}{2} \int_{\mathbb{R} \times \mathbb{R}^d \times \mathbb{R}} |a|^2 + \|w\|_2^2 d\pi_{(a, w, b)}.$$

$f_{\pi, b_0}$  is an analogue of neural networks with a single hidden layer, but of arbitrary and possibly uncountably infinite width. Every finite neural network can be expressed in this fashion for the empirical measure  $\pi_m = \frac{1}{m} \sum_{i=1}^m \delta_{(a_i, w_i, b_i)}$ , in which case  $R_{WD}(\pi_m) = R_{WD}(a, W, b)$ .

Unfortunately, even if  $R_{WD}(\pi) < \infty$ , it is not clear that the integral defining  $f_\pi$  exists in a meaningful sense. We do however note that formally

$$\begin{aligned} |f_\pi(x) - f_\pi(y)| &= \mathbb{E}[a \{\sigma(w^T x + b) - \sigma(w^T y + b)\}] \leq \mathbb{E}[|a| |w^T x + b| - |w^T y + b|] \\ &\leq \|x - y\| \mathbb{E}[|a| \|w\|] \leq \frac{\|x - y\|}{2} \mathbb{E}[|a|^2 + \|w\|^2] = \|x - y\| R_{WD}(\pi). \end{aligned}$$

Thus, the integral defining  $f_\pi(x)$  exists for all  $x$  if and only if it exists for, say,  $x = 0$ . We exploit this in the following modified definition. Let  $\pi$  be a probability distribution on the parameter space  $\mathbb{R} \times \mathbb{R}^d \times \mathbb{R}$  and  $y \in \mathbb{R}$ . We denote

$$f_{\pi, y}(x) = y + \mathbb{E}_{(a, w, b) \sim \pi} [a(\sigma(w^T x + b) - \sigma(b))]$$

By the same argument as before, we observe that

1.  $f_{\pi, y}(0) = y$  and
2.  $|f_{\pi, y}(x) - f_{\pi, y}(x')| \leq R_{WD}(\pi) \|x - x'\|$ .

The class of functions of the form  $f_{\pi, y}$  forms the homogeneous Barron space. Still, every finite neural network  $f_m$  can be represented in this fashion with  $b_0 = y - \sum_{i=1}^m a_i \sigma(b_i)$  or  $b_0 = y - \frac{1}{m} \sum_{i=1}^m a_i \sigma(b_i)$ .

**Definition C.1** (Homogeneous Barron space). *Let  $f : \mathbb{R}^d \rightarrow \mathbb{R}$  be a function. We define the semi-norms*

$$[f]_{\mathcal{B}} = \inf_{f \equiv f_{\pi, y}} R_{WD}(\pi), \quad [f]_0 = |f(0)|.$$

*The homogeneous Barron space is the function class  $\mathcal{B}(\mathbb{R}^d) = \{f : \mathbb{R}^d \rightarrow \mathbb{R} : [f]_{\mathcal{B}} < \infty\}$ . By the definition of a function  $[f]_0 < \infty$  is automatically true.*

We note a few important properties. First, we consider two function classes:

$$\begin{aligned} \mathcal{F}_Q &= \overline{\text{conv}\{a(\sigma(w \cdot x + b) - \sigma(b)) : a^2 + \|w\|^2 \leq 2Q\}} \\ \mathcal{F}_Q(R) &= \overline{\text{conv}\{a(\sigma(w \cdot x + b) - \sigma(b)) : a^2 + \|w\|^2 \leq 2Q, |b| \leq \sqrt{Q}R\}}. \end{aligned}$$

Note that  $\mathcal{F}_Q(R) \subseteq \mathcal{F}_Q \subseteq \{f \in \mathcal{B} : f(0) = 0, [f]_{\mathcal{B}} \leq Q\}$ . The closure is taken with respect to locally uniform convergence, i.e. pointwise convergence which is uniform on all compact sets.<sup>1</sup> Due to the homogeneity of ReLU activation, we may prove the following.

**Lemma C.2.** *The identity  $\mathcal{F}_Q = \{f \in \mathcal{B} : f(0) = 0, [f]_{\mathcal{B}} \leq Q\}$  holds.*

While the claim is natural, its proof is surprisingly technical and postponed until the end of the section. The class  $\mathcal{F}_Q(R)$  will be used below for technical purposes. Of major importance below are the compact embedding theorem and the direct approximation theorem.

**Theorem C.3** (Compact embedding). *Let  $f_n \in \mathcal{B}$  be a sequence such that  $\liminf_{n \rightarrow \infty} [f_n]_0 + [f_n]_{\mathcal{B}} < +\infty$ . Then there exists  $f$  in  $\mathcal{B}$  such that*

1.  $f_n \rightarrow f$  in  $C^0(K)$  for all compact sets  $K \subseteq \mathbb{R}^d$ .
2.  $f_n \rightarrow f$  in  $L^p(\mu)$  for all measures  $\mu$  with finite  $p$ -th moments,  $p \in [1, \infty)$ .
3.  $[f]_{\mathcal{B}} \leq \liminf_{n \rightarrow \infty} [f_n]_{\mathcal{B}}$ .

*Proof.* It is sufficient to show that the set  $\tilde{\mathcal{F}}_Q = \{a(\sigma(w \cdot x + b) - \sigma(b)) \mid a^2 + |w|^2 \leq 2Q\}$  is compact in  $C^0(K)$  and  $L^2(\mu)$  for all  $K$  and  $\mu$  as above, in which case also its closed convex hull is compact [Rudin, 1991, Theorem 3.20.]. To this end, observe that the map

$$F : \mathbb{R} \times \mathbb{R}^d \times \mathbb{R} \rightarrow C^0(K), \quad (a, w, b) \mapsto a(\sigma(w \cdot x + b) - \sigma(b))$$

is continuous for any compact set  $K$ . Since  $K$  is compact, we have  $K \subseteq B_R(0)$  for some  $R > 0$  and thus  $|w \cdot x| \leq \sqrt{2Q}R$  for all  $x \in K$ . In particular,

$$\sigma(w \cdot x + b) - \sigma(b) = \begin{cases} w \cdot x & \text{if } b > \sqrt{2Q}R \\ 0 & \text{if } b < \sqrt{2Q}R \end{cases}.$$

Hence  $\tilde{\mathcal{F}}_Q = F(\{(a, w, b) : a^2 + |w|^2 \leq 2Q, b \leq \sqrt{2Q}R\})$  is the continuous image of a compact set, hence compact. We have thus proved a compact embedding into  $C^0(K)$  for any compact set  $K$ .

Exhausting  $\mathbb{R}^d$  by the sequence of compact sets  $\overline{B_m(0)}$ ,  $m \in \mathbb{N}$  and using a diagonal sequence argument, we see that under the conditions of Theorem C.3, there exists  $f \in \mathcal{B}$  such that  $f_n \rightarrow f$  pointwise everywhere on  $\mathbb{R}^d$  and uniformly on compact subsets. Additionally, we observe that  $f(0) = 0$  and there exists a uniform upper bound on the Lipschitz constants of the sequence  $f_n$ . We conclude that  $f_n \rightarrow f$  in  $L^p(\mu)$  from the Dominated Convergence Theorem using  $Q\|x\|$  as a dominating function.  $\square$

As a consequence, we find the following.

**Corollary C.4.** 1.  $\mathcal{B}$  is a Banach space.

2.  $C_c^\infty(\mathbb{R}^d) \subseteq \mathcal{B}(\mathbb{R}^d)$ .

*Proof.* The first claim follows as in [Siegel and Xu, 2021, Lemma 1], where it is proved in a more general context for dictionaries which are compact in a Hilbert space – in our case, the dictionary  $x \mapsto a\{\sigma(w^T x + b) - \sigma(b)\}$ . The second claim follows from [Ongie et al., 2019, Corollary 1].  $\square$

We conclude with a theorem which establishes a rate of approximation for Barron functions in a weaker topology.

**Theorem C.5** (Direct approximation). *Let  $f \in \mathcal{B}$  and  $\mu$  a measure on  $\mathbb{R}^d$  with finite second moments. Then for any  $m \in \mathbb{N}$  there exist  $c \in \mathbb{R}$  and  $(a_i, w_i, b_i) \in \mathbb{R} \times \mathbb{R}^d \times \mathbb{R}$  such that*

$$\sum_{i=1}^m a_i^2 + \|w_i\|^2 \leq [f]_{\mathcal{B}}, \quad \left\| f - c - \sum_{i=1}^m a_i \sigma(w_i^T x + b_i) \right\|_{L^2(\mu)} \leq \frac{2[f]_{\mathcal{B}}}{\sqrt{m}} \sup_{\|w\|=1} \sqrt{\int_{\mathbb{R}^d} |w^T x|^2 d\mu_x}.$$

<sup>1</sup> This notion of convergence is generated by a topology, but not a metric. Other notions of convergence can be considered and induce the same function class.

836 *Proof.* A proof of this result can be found in [Wojtowytsch, 2022, Appendix C] in the proof of  
 837 Proposition 2.6.  $\square$

838 *Proof of Lemma C.2.* **Step 1.** Assume that  $f \in \mathcal{B}$  such that  $f(0) = 0$  and  $[f]_{\mathcal{B}} \leq Q$ . By the Direct  
 839 Approximation Theorem (which is proved in [Wojtowytsch, 2022, Appendix C] without using Lemma  
 840 C.2), we find that for every  $m \in \mathbb{N}$  and every measure  $\mu$  on  $\mathbb{R}^d$  with finite second moments, there  
 841 exists

$$f_m(x) = \frac{1}{m} \sum_{i=1}^m a_i \{ \sigma(w_i \cdot x + b_i) - \sigma(b_i) \} \in \mathcal{F}_Q$$

842 such that  $\|f_m - f\|_{L^2(\mu)} \leq C_\mu \|f\|_{\mathcal{B}} m^{-1/2}$ . In particular,  $f$  is in the closed convex hull of  
 843  $\{a \{ \sigma(w^T x + b) - \sigma(b) \} : a^2 + |w|^2 \leq 2Q\}$  if the closure is taken with respect to the  $L^2(\mu)$   
 844 topology. Additionally, the sequence  $f_m$  has a uniformly bounded Lipschitz constant and is therefore  
 845 compact in  $C^0(K)$  for all compact  $K$  by a corollary to the Arzela-Ascoli theorem [Dobrowolski  
 846 2010, Satz 2.42]. In particular,  $f_m \rightarrow f$  uniformly and thus  $f \in \mathcal{F}_Q$ .

847 **Step 2.** Denote  $f_{(a,w,b)}(x) = a \{ \sigma(w^T x + b) - \sigma(b) \}$ . Since  $f_{(a,w,b)}(0) = a \{ \sigma(b) - \sigma(b) \} = 0$  for  
 848 all  $a, w, b$ , we conclude that  $f(0) = 0$  for all  $f \in \mathcal{F}_Q$ . If  $f \in \mathcal{F}_Q$ , then there exists a sequence

$$f_n(x) = \sum_{i=1}^{N_n} \lambda_{i,n} a_{i,n} \{ \sigma(w_{i,n} \cdot x + b_{i,n}) - \sigma(b_{i,n}) \}$$

849 such that  $f_n \rightarrow f$  locally uniformly. If the biases remain uniformly bounded, the sequence of  
 850 empirical distributions

$$\pi_n = \frac{1}{N_n} \sum_{i=1}^{N_n} \lambda_{i,n} \delta_{(a_{i,n}, w_{i,n}, b_{i,n})}$$

851 has a convergent subsequence by Prokhorov's Theorem [Klenke, 2006, Satz 13.29]. We denote the  
 852 limiting distribution as  $\pi$ . The convergence of Radon measures implies the convergence of  $f_n$  to  
 853  $f_\pi(x) = \mathbb{E}_{(a,w,b) \sim \pi} [a \{ \sigma(w^T x + b) - \sigma(b) \}]$  by definition. Since  $f_n$  converges locally uniformly  
 854 by assumption,  $f = f_\pi \in \mathcal{B}$  and  $[f]_{\mathcal{B}} \leq Q$ .

855 If the biases do not remain bounded, we note that for every compact set  $K \subseteq \mathbb{R}^d$  we can extract a  
 856 convergent subsequence of the measures by the same argument used to prove Theorem C.3, effectively  
 857 making the sequence of biases bounded. We can extend the argument to the entire space exploiting  
 858 that

$$\lim_{b \rightarrow \infty} (\sigma(w \cdot x + b) - \sigma(b)) \rightarrow \sigma(b/|b|) w \cdot x$$

859 locally uniformly.  $\square$

## 860 D Rademacher complexity of homogeneous Barron space

861 Following a classical strategy implemented e.g. by [E et al., 2019a] in a similar context, we estimate  
 862 the Rademacher complexity of homogeneous Barron space and use it to bound the generalization gap  
 863 (i.e. the discrepancy between empirical risk and population risk). In our setting, we face additional  
 864 technical obstacles:

- 865 1. We deal with general sub-Gaussian data distributions  $\mu$  rather than data distributions with  
 866 compact support.
- 867 2. We do not control the magnitude of the bias variables.
- 868 3. We consider  $\ell^2$ -loss, which is neither globally Lipschitz-continuous nor bounded.

869 In combination, these complications require a refined technical analysis similar to Appendix C. Let  
 870 us summarize several notations which will be needed below.

- 871 •  $\widehat{\text{Rad}}$  – the empirical Rademacher complexity of a function class over a given dataset.
- 872 •  $\text{Rad}_n$  – the expected Rademacher complexity of a function class over a data set composed  
 873 of  $n$  iid samples from the data distribution  $\mu$ .



- $\mathcal{R}$  – the population risk  $\mathcal{R}(f) = \|f - f^*\|_{L^2(\mu)}^2 = \mathbb{E}_{x \sim \mu} [|f(x) - f^*(x)|^2]$ . We generally take this to operate on the level of functions, parametrized or not. By an abuse of notation, we identify  $\mathcal{R}(a, W, b) := \mathcal{R}(f_{(a,W,b)})$ .
- $\widehat{\mathcal{R}}_n$  – the empirical risk  $\widehat{\mathcal{R}}_n(f) = \|f - f^*\|_{L^2(\mu_n)}^2 = \frac{1}{n} \sum_{i=1}^n |f(x_i) - f^*(x_i)|^2$  over a data set  $\{x_1, \dots, x_n\}$  where  $\mu_n = \frac{1}{n} \sum_{i=1}^n \delta_{x_i}$  is the empirical measure. Equally,  $\widehat{\mathcal{R}}_n$  can be considered for functions or parameters with the natural identification.
- $\widehat{\mathcal{R}}_{n,m,\lambda}$ . The regularized empirical risk

$$\widehat{\mathcal{R}}_{n,m,\lambda}(a, W, b) = \widehat{\mathcal{R}}_n(a, W, b) + \frac{\lambda}{2} (\|a\|^2 + \|W\|^2).$$

We only consider this quantity on the parameter level, where it is computable. While the weight decay regularizer is an upper bound for  $[f_{(a,W,b)}]_{\mathcal{B}}$ , the two are generally not the same since the parameter-to-function map of a neural network is generally not injective.

- $R_{WD}$  – the weight decay regularizer.
- $\mathcal{F}_Q$  – the set of functions for which  $[f]_{\mathcal{B}} \leq Q$  and  $f(0) = 0$ .
- $\mathcal{F}_{A,Q}$  – the set of functions for which  $[f]_{\mathcal{B}} \leq Q$  and  $|f(0)| \leq A$ .

As is common in the mathematics community,  $C$  will generally denote a constant which does not depend on quantities (unless specified otherwise) and which may change value from line to line. Some facts about sub-Gaussian distributions, which we believe to be well-known to the experts, are collected in Appendix [H](#).

**Definition D.1** (Rademacher Complexity). *Let  $S = \{x_1, \dots, x_n\}$  be a set of points in  $\mathbb{R}^d$  (a data sample) and  $\mathcal{F}$  a real-valued function class. We define the empirical Rademacher complexity of  $\mathcal{F}$  on the data sample as*

$$\widehat{\text{Rad}}(\mathcal{F}; S) = \mathbb{E}_{\varepsilon} \left[ \sup_{f \in \mathcal{F}} \frac{1}{n} \sum_{i=1}^n \varepsilon_i f(x_i) \right]$$

where  $\varepsilon_i$  are iid random variables which take the values  $\pm 1$  with equal probability  $\frac{1}{2}$ . The population Rademacher complexity is defined as

$$\text{Rad}_n(\mathcal{F}) = \mathbb{E}_{S \sim \mu^n} [\widehat{\text{Rad}}(\mathcal{F}; S)],$$

i.e. as the expected empirical Rademacher complexity over a set of  $n$  iid data points.

In this section, we will find an upper bound of Rademacher Complexity of  $\mathcal{B}$ . We will denote by  $S_n$  the set of  $n$  samples, and  $\widehat{\text{Rad}}(\mathcal{F}, S_n)$  the sample Rademacher Complexity of  $\mathcal{F}$  given the samples  $S_n$ . We furthermore denote  $R := \max\{\|x_1\|, \dots, \|x_n\|\}$  and consider the function classes  $\mathcal{F}_Q$  and  $\mathcal{F}_Q(R)$  as in Appendix [C](#).

$$\begin{aligned} \mathcal{F}_Q &= \overline{\text{conv}\{a(\sigma(w \cdot x + b) - \sigma(b)) : a^2 + \|w\|^2 \leq 2Q\}} \\ \mathcal{F}_Q(R) &= \overline{\text{conv}\{a(\sigma(w \cdot x + b) - \sigma(b)) : a^2 + \|w\|^2 \leq 2Q, |b| \leq \sqrt{Q}R\}}. \end{aligned}$$

**Lemma D.2.** *Let  $S_n = \{x_1, \dots, x_n\}$  be a data set in  $\mathbb{R}^d$ . Then*

$$\widehat{\text{Rad}}(\mathcal{F}_Q, S_n) \leq \frac{(1 + 3\sqrt{2})Q}{\sqrt{n}} \max_{1 \leq i \leq n} \|x_i\|.$$

Assume  $\mu$  is a  $\sigma^2$  sub-Gaussian distribution in  $\mathbb{R}^d$ . Then

$$\text{Rad}(\mathcal{F}_Q) \leq (1 + 3\sqrt{2})Q \left( \frac{\mathbb{E}_{x \sim \mu} [\|x\|]}{\sqrt{n}} + \sigma \sqrt{2 \frac{\log n}{n}} \right)$$

for all  $n \geq 2$ .

904 *Proof.* Initially, we fix a set  $S = \{x_2, \dots, x_n\}$  of  $n$  points. We will later take the expectation over  
 905  $S$ , using the sub-Gaussian property of  $\mu$  for an explicit norm bound. Define  $R := \max_{1 \leq i \leq n} \|x_i\|$ .  
 906 To this end, we first prove the following claim, which enables us to focus on only single neuron  
 907 functions instead of entire  $\mathcal{F}_Q$ :

908 **Claim:** Let  $\varepsilon_1, \dots, \varepsilon_n \in \mathbb{R}$ . Then

$$\sup_{\mathcal{F}_Q} \sum_i \varepsilon_i f(x_i) = \sup_{a^2 + \|w\|^2 \leq 2Q} \sum_i \varepsilon_i a \{ \sigma(w^T x_i + b) - \sigma(b) \}$$

909 *Proof of Claim.* Note that  $\mathcal{F}_Q$  is the closed convex hull of single neuron ridge functions, i.e. single  
 910 neuron ridge functions are the extreme points of the closed convex set  $\mathcal{F}_Q$ .

911 To verify the claim, first note that  $f \mapsto \sum_{i=1}^n \varepsilon_i f(x_i)$  is a continuous linear functional on  $C^0(K)$  for  
 912 any compact  $K \subseteq \mathbb{R}^d$  containing the finite set  $S$ . It is well known that  $C^0(K)$  is a Banach Space.  
 913 Therefore, if  $\{a(\sigma(w \cdot x + b) - \sigma(b)) \mid a^2 + \|w\|^2 \leq 2Q\}$  is compact in  $C^0(K)$ , then [Rudin, 1991,  
 914 Theorem 3.20.] implies that  $\mathcal{F}_Q$ , a closed convex hull of the compact set, is also compact. Then, from  
 915 the compactness of  $\mathcal{F}_Q$ , we can use [Bauer, 1958]'s maximum principle and see that the supremum  
 916 is attained at an extreme point. Compactness follows from the compact embedding Theorem, see  
 917 Theorem C.3 above.  $\square$

918 Over the next steps, we will bound  $\widehat{\text{Rad}}(\mathcal{F}_Q, S_n)$ .

919 **Step 1.** In this step, we prove that

$$\widehat{\text{Rad}}(\mathcal{F}_Q; S_n) = \widehat{\text{Rad}}(\mathcal{F}_Q(R); S_n).$$

920 To show this, we first observe that if  $|b| \geq \|w\| R$ , then  $\sigma(w \cdot x + b) - \sigma(b) = \sigma(\text{sgn}(b))w \cdot x$  since  
 921  $|w^T x_i| \leq \|w\| \|x_i\| \leq \|w\| R$  for all  $1 \leq i \leq n$ . This means for  $\forall |b| \geq \|w\| R$ , the precise value of  $b$   
 922 does not change the value of  $\sigma(w \cdot x + b) - \sigma(b)$ .

923 Now, we compute the  $\widehat{\text{Rad}}(\mathcal{F}_Q, S_n)$ :

$$\begin{aligned} n \widehat{\text{Rad}}(\mathcal{F}_Q, S_n) &= \mathbb{E}_\varepsilon \left[ \sup_{\mathcal{F}_Q} \sum_i \varepsilon_i f(x_i) \right] \\ &= \mathbb{E}_\varepsilon \left[ \sup_{a^2 + \|w\|^2 \leq 2Q} \sum_i \varepsilon_i a \{ \sigma(w \cdot x_i + b) - \sigma(b) \} \right] \\ &= \mathbb{E}_\varepsilon \left[ \sup_{a^2 + \|w\|^2 \leq 2Q, |b| \leq \|w\| R} \sum_i \varepsilon_i a \{ \sigma(w \cdot x_i + b) - \sigma(b) \} \right] \\ &= n \widehat{\text{Rad}}(\mathcal{F}_Q(R), S_n) \end{aligned}$$

924 For the first line, we used the claim.

925 **Step 2.** Using the uniform bound on the magnitude of the bias from the previous step, in this step we  
 926 bound the Rademacher complexity by

$$\widehat{\text{Rad}}(\mathcal{F}_Q; S) = \widehat{\text{Rad}}(\mathcal{F}_Q(R); S) \leq \mathbb{E}_\varepsilon \left[ \sup_{|w| \leq Q, |b| \leq QR} \left| \frac{1}{n} \sum_{i=1}^n \varepsilon_i \sigma(w \cdot x_i + b) \right| \right] + \frac{QR}{\sqrt{n}}$$

927 We verify this from the definition of Rademacher Complexity of  $\mathcal{F}_Q(R)$ . Note that  $a\sigma(wx + b) =$   
 928  $(\lambda a) \sigma((w/\lambda)x + b/\lambda)$ . In particular, we may assume without loss of generality that  $|a|^2 = \|w\|^2 \leq Q$   
 929 for optimal balance which makes  $a^2 + \|w\|^2$  minimal without changing the neuron output.

$$n \text{Rad}(\mathcal{F}_Q(R), S_n) = \mathbb{E}_\varepsilon \left[ \sup_{\mathcal{F}_Q} \sum_i \varepsilon_i f(x_i) \right]$$



$$\begin{aligned}
&= \mathbb{E}_\epsilon \left[ \sup_{a^2 + \|w\|^2 \leq Q, |b| \leq \|w\|R} \sum_{i=1}^n \epsilon_i a(\sigma(w \cdot x_i + b) - \sigma(b)) \right] \\
&\leq \mathbb{E}_\epsilon \left[ \sup_{|a|=\|w\| \leq \sqrt{Q}, |b| \leq \sqrt{QR}} \left( \left| \sum_i \epsilon_i a \sigma(w \cdot x_i + b) \right| + \left| \sum_i \epsilon_i a \sigma(b) \right| \right) \right].
\end{aligned}$$

930 In this step, we only consider the first term.:

$$\begin{aligned}
\mathbb{E}_\epsilon \left[ \sup_{|a|=\|w\| \leq \sqrt{Q}, |b| \leq \sqrt{QR}} \left| \sum_i \epsilon_i a \sigma(b) \right| \right] &\leq \mathbb{E}_\epsilon \left[ \sup_{|a| \leq \sqrt{Q}, |b| \leq \sqrt{QR}} \left| \sum_i \epsilon_i a \sigma(b) \right| \right] \\
&\leq \sup_{|a| \leq \sqrt{Q}, |b| \leq \sqrt{QR}} |a| |\sigma(b)| \mathbb{E}_\epsilon \left| \sum_i \epsilon_i \right| \leq QR \sqrt{n}.
\end{aligned}$$

931 The first line is again by applying the claim to  $\mathcal{F}_Q(R)$ . In the last line, we used two facts:

- 932 1.  $\sigma$  is ReLU, so  $|a|\sigma(b) \leq |ab| \leq \sqrt{Q} \cdot \sqrt{QR} = QR$  and  
933 2. the observation that

$$\mathbb{E}_\epsilon \left| \sum_i \epsilon_i \right| \leq \sqrt{\mathbb{E}_\epsilon \left| \sum_i \epsilon_i \right|^2} = \sqrt{\sum_{i,j=1}^n \mathbb{E}_\epsilon [\epsilon_i \epsilon_j]} = \sqrt{\sum_{i=1}^n \mathbb{E}_\epsilon [\epsilon_i^2]} = \sqrt{n}$$

934 since  $\mathbb{E}[\epsilon_i] = 0$ ,  $\epsilon_i$  and  $\epsilon_j$  are independent if  $i \neq j$  and  $\epsilon_i^2 \equiv 1$ .

935 **Step 3.** In this step, we prove that

$$\frac{1}{n} \mathbb{E}_\epsilon \left[ \sup_{|a|=\|w\| \leq \sqrt{Q}, |b| \leq \sqrt{QR}} \left| \sum_{i=1}^n \epsilon_i a \sigma(w \cdot x_i + b) \right| \right] \leq \frac{3\sqrt{2}QR}{\sqrt{n}}$$

936 To this end, we modify the data points as  $\tilde{x}_i = (x_i, R)$  and the parameters as  $\tilde{w} = (w^T, \frac{b}{R})$ . Then,  
937 observe that  $w \cdot x_i + b = \tilde{w} \cdot \tilde{x}_i$ ,  $\|\tilde{x}_i\| = \sqrt{\|x_i\|^2 + R^2} \leq \sqrt{2}R$ , and  $a^2 + \|\tilde{w}\|^2 = a^2 + \|w\|^2 + (\frac{b}{R})^2 \leq$   
938  $3Q$ . Therefore, we can write the above by the following:

$$\begin{aligned}
&\frac{1}{n} \mathbb{E}_\epsilon \left[ \sup_{a^2 + \|w\|^2 \leq Q, |b| \leq Q} \left| \sum_{i=1}^n \epsilon_i a \sigma(w \cdot x_i + b) \right| \right] \leq \frac{1}{n} \mathbb{E}_\epsilon \left[ \sup_{a^2 + \|\tilde{w}\|^2 \leq 3Q} \left| \sum_{i=1}^n \epsilon_i a \sigma(\tilde{w} \cdot \tilde{x}_i) \right| \right] \\
&= \frac{1}{n} \mathbb{E}_\epsilon \left[ \sup_{a^2 + \|\tilde{w}\|^2 \leq 3Q} |a| \|\tilde{w}\| \left| \sum_{i=1}^n \epsilon_i \sigma \left( \frac{\tilde{w}}{\|\tilde{w}\|} \cdot \tilde{x}_i \right) \right| \right] \\
&\leq \frac{1}{n} \mathbb{E}_\epsilon \left[ \sup_{a^2 + \|\tilde{w}\|^2 \leq 3Q, \|u\|_2 \leq 1} \frac{a^2 + \|\tilde{w}\|^2}{2} \left| \sum_{i=1}^n \epsilon_i \sigma(u \cdot \tilde{x}_i) \right| \right] \\
&\leq \frac{3Q}{2n} \mathbb{E}_\epsilon \left[ \sup_{\|u\|_2 \leq 1} \left| \sum_{i=1}^n \epsilon_i \sigma(u \cdot \tilde{x}_i) \right| \right] \\
&\leq \frac{3Q}{n} \mathbb{E}_\epsilon \left[ \sup_{\|u\|_2 \leq 1} \sum_{i=1}^n \epsilon_i \sigma(u \cdot \tilde{x}_i) \right] \\
&= 3Q \widehat{\text{Rad}}(\sigma \circ \mathcal{H}_2, \tilde{S}_n) \leq 3Q \widehat{\text{Rad}}(\mathcal{H}_2, \tilde{S}_n) \leq \frac{3Q}{\sqrt{n}} \max_i \|\tilde{x}_i\|_2 \leq \frac{3\sqrt{2}QR}{\sqrt{n}}
\end{aligned}$$

939 Here,  $\mathcal{H}_2 := \{u \in \mathbb{R}^d \mid \|u\|_2 \leq 1\}$  and  $\tilde{S}_n = \{\tilde{x}_1, \dots, \tilde{x}_n\}$ . When removing the absolute value, we  
940 used that the sum is always non-negative and that it is symmetric when replacing  $\epsilon$  by  $-\epsilon$ . When  
941 removing  $\sigma$ , we make use of the Contraction Lemma for Rademacher complexity [Shalev-Shwartz  
942 and Ben-David, 2014, Lemma 26.9]. Finally, for  $\text{Rad}(\mathcal{H}_2, \tilde{S}_n)$  we used the expression for the  
943 Rademacher complexity of the class of linear functions on Hilbert space. [Shalev-Shwartz and  
944 Ben-David, 2014, Lemma 26.10]. This concludes Step 3.

945 **Step 4.** In this step, we finally consider sets  $S$  which are sampled from the product measure  $\mu^n$ , i.e.  
 946 sets where  $x_1, \dots, x_n$  are independent data samples with law  $\mu$ . From steps 1 – 3, we know that

$$\text{Rad}(\mathcal{F}_Q) = \mathbb{E}_{S_n \sim \mu^n} [\widehat{\text{Rad}}(\mathcal{F}, S_n)] \leq \frac{(1 + 3\sqrt{2})Q}{\sqrt{n}} \mathbb{E}_{(x_1, \dots, x_n) \sim \mu^n} \left[ \max_{1 \leq i \leq n} \|x_i\| \right].$$

947 We bound  $\mathbb{E}_{(x_1, \dots, x_n) \sim \mu^n} [\max_{1 \leq i \leq n} \|x_i\|]$  by Lemma [H.1](#) to obtain

$$\text{Rad}(\mathcal{F}_Q) \leq (1 + 3\sqrt{2})Q \left( \frac{\mathbb{E}_{x \sim \mu} [\|x\|]}{\sqrt{n}} + \sigma \sqrt{2 \frac{\log n}{n}} \right) \quad \square$$

948 A similar result follows immediately for the more general function class

$$\mathcal{F}_{A,Q} := \{f \in \mathcal{B} : [f]_{\mathcal{B}} \leq Q, |f(0)| \leq A\}. \quad (5)$$

949 **Corollary D.3.** *Under the same conditions as Lemma [D.2](#) we have*

$$\text{Rad}(\mathcal{F}_{A,Q}) \leq (1 + 3\sqrt{2})Q \left( \frac{\mathbb{E}_{x \sim \mu} [\|x\|]}{\sqrt{n}} + \sigma \sqrt{2 \frac{\log n}{n}} \right) + \frac{A}{\sqrt{n}}$$

950 *Proof.* We note that  $f \in \mathcal{F}_{A,Q}$  if and only if  $f = \tilde{f} + \alpha$  with  $\tilde{f} \in \mathcal{F}_Q$  and  $|\alpha| \leq A$ . Hence, for any  
 951 fixed dataset  $S$ , we have

$$\begin{aligned} n \widehat{\text{Rad}}_n(\mathcal{F}_{A,Q}) &= \mathbb{E}_{\varepsilon} \left[ \sup_{f \in \mathcal{F}_{A,Q}} \sum_{i=1}^n \varepsilon_i f(x_i) \right] = \mathbb{E}_{\varepsilon} \left[ \sup_{f \in \mathcal{F}_Q, |\alpha| \leq A} \sum_{i=1}^n \varepsilon_i (\alpha + f(x_i)) \right] \\ &\leq \mathbb{E}_{\varepsilon} \left[ \sup_{f \in \mathcal{F}_Q} \sum_{i=1}^n \varepsilon_i f(x_i) \right] + \mathbb{E}_{\varepsilon} \left[ \sup_{|\alpha| \leq A} \sum_{i=1}^n \varepsilon_i \alpha \right] \leq \widehat{\text{Rad}}_n(\mathcal{F}_Q) + \frac{A}{\sqrt{n}} \end{aligned}$$

952 by the argument of Step 2 in the proof of Lemma [D.2](#) □

953 A bound on the Rademacher complexity, together with the sub-Gaussian property of the distribution  
 954  $\mu$ , allows us to control the ‘generalization gap’ in homogeneous Barron spaces.

955 **Corollary D.4.** *Assume that  $\mu$  is a  $\sigma^2$ -sub-Gaussian distribution on  $\mathbb{R}^d$ . Let  $(X_1, \dots, X_n)$  be iid  
 956 random variables with law  $\mu$  and  $f^*$  a  $\mu$ -measurable function such that*

$$|f^*(x) - f^*(0)| \leq B_1 + B_2 \|x\|$$

957  $\mu$ -almost everywhere. Let

$$\widehat{\mathcal{R}}_n(f) = \frac{1}{n} \sum_{i=1}^n |f(X_i) - f^*(X_i)|^2, \quad \mathcal{R}(f) = \mathbb{E}_{x \sim \mu} [|f(x) - f^*(x)|^2].$$

958 Then with probability at least  $1 - 2\delta$  over the random draw of  $X_1, \dots, X_n$ , the bound

$$\sup_{f - f^*(0) \in \mathcal{F}_{A,Q}} (\mathcal{R}(f) - \widehat{\mathcal{R}}_n(f)) \leq C^* \left( (Q + B_2) (\mathbb{E}_{x \sim \mu} \|x\| + \sigma^2 + 1) + A + B_1 \right)^2 \frac{\log(n/\delta)}{\sqrt{n}}$$

959 holds for a constant  $C^* > 0$  which does not depend on  $\delta, Q, d, \mu$  or  $n$ .

960 *Proof. Step 1.* From Lemma [H.2](#) with probability at least  $1 - \delta$  we have

$$\max_{1 \leq i \leq n} \|X_i\| \leq \mathbb{E}_{x \sim \mu} [\|x\|] + \sigma \sqrt{2 \log(n/\delta)}.$$

961 We denote  $R_n := \mathbb{E}_{x \sim \mu} [\|x\|] + \sigma \sqrt{2 \log(n/\delta)}$  for simplicity.

962 **Step 2.** Consider the modified loss function

$$\ell_{\xi}(f) = \min \{f^2, \xi^2\},$$

which is bounded by  $\xi^2$  and satisfies  $|\partial_f \ell_\xi| \leq 2R$ , i.e.  $\ell_\xi$  is  $2\xi$ -Lipschitz continuous. We thus observe that, with probability at least  $1 - \delta$  over the choice of random set  $S = \{x_1, \dots, x_n\}$ , we have

$$\mathbb{E}_{x \sim \mu} [\ell_\xi(f(x) - f^*(x))] - \frac{1}{n} \sum_{i=1}^n \ell_\xi(f(x_i) - f^*(x_i)) \leq 4\xi \mathbb{E}[\widehat{\text{Rad}}(\mathcal{F}_Q, S_n)] + \xi^2 \sqrt{\frac{2 \log(2/\delta)}{n}}$$

by [Shalev-Shwartz and Ben-David, 2014, Theorem 26.5] and the Contraction Lemma for Rademacher complexities, [Shalev-Shwartz and Ben-David, 2014, Lemma 26.9]. In particular

$$\begin{aligned} \mathbb{E}_{x \sim \mu} [\ell_\xi(f(x) - f^*(x))] &\leq \frac{1}{n} \sum_{i=1}^n \ell_\xi(f(x_i) - f^*(x_i)) + \xi^2 \sqrt{\frac{2 \log(2/\delta)}{n}} \\ &\quad + 4(1 + 3\sqrt{2})Q\xi \left( \frac{\mathbb{E}_{x \sim \mu} \|x\|}{\sqrt{n}} + \sigma \sqrt{\frac{2 \log n}{n}} \right) + \frac{A\xi}{\sqrt{n}}. \end{aligned}$$

**Step 3.** By the union bound, with probability at least  $1 - 2\delta$ , both the norm bound of Step 1 and the generalization bound of Step 2 hold. In the following, we assume that both bounds hold. Note that

$$|f(x) - f^*(x)| \leq |f(x) - f^*(0)| + |f^*(x) - f^*(0)| \leq (A + B_1) + (Q + B_2)\|x\|.$$

In particular, if  $\xi \geq (A + B_1) + (Q + B_2)R$ , then  $|f(x) - f^*(x)| \leq \xi$  on  $B_R(0)$ , so  $\ell_\xi(f(x) - f^*(x)) \equiv \ell(f(x) - f^*(x))$ . Applying the generalization bound with  $R_n = \mathbb{E}_{x \sim \mu} \|x\| + \sigma \sqrt{2 \log(n/\delta)}$  and  $\xi_n = (Q + B_2)R_n + (A + B_1)$ , we find that  $\ell_{\xi_n}(f(x_i) - f^*(x_i)) = \ell(f(x_i) - f^*(x_i))$  for all  $i$  by assumption and thus, with probability at least  $1 - 2\delta$ , we have

$$\begin{aligned} \mathbb{E}_{x \sim \mu} [\ell_\xi(f(x) - f^*(x))] &\leq \frac{1}{n} \sum_{i=1}^n (f(x_i) - f^*(x_i))^2 + ((Q + B_2)R_n + A + B_1)^2 \sqrt{\frac{2 \log(2/\delta)}{n}} \\ &\quad + 4(1 + 3\sqrt{2})Q((Q + B_2)R_n + A + B_1) \left( \frac{\mathbb{E}_{x \sim \mu} \|x\|}{\sqrt{n}} + \sigma \sqrt{\frac{2 \log n}{n}} \right). \end{aligned}$$

**Step 4.** Finally, we bound the population risk with the true loss function rather than  $\ell_\xi$ . Thus we find that for  $B_R := B_R(0)$  we have

$$\begin{aligned} \mathbb{E}_{x \sim \mu} [(f(x) - f^*(x))^2] &= \mathbb{E}_{x \sim \mu} [(f(x) - f^*(x))^2 1_{B_R}] + \mathbb{E}_{x \sim \mu} [(f(x) - f^*(x))^2 1_{\mathbb{R}^d \setminus B_R}] \\ &\leq \mathbb{E}_{x \sim \mu} [\ell_\xi(f(x) - f^*(x))] + \mathbb{E}_{x \sim \mu} [(A + B_1 + (Q + B_2)\|x\|)^2 1_{\mathbb{R}^d \setminus B_R}] \end{aligned}$$

for  $R \geq 3$ . From Lemma H.3 with  $R_n = \mathbb{E}\|x\| + \sigma \sqrt{2 \log(n/\delta)}$ , we have

$$\mathbb{E}_{x \sim \mu} [\|x\|^2 1_{B_{R_n}(0)^c}(x)] \leq \sqrt{2\pi} \exp\left(-\frac{\log(n/\delta)}{2}\right) ((\mathbb{E}\|x\|)^2 + 2\sigma^2) = \sqrt{2\pi} \frac{(\mathbb{E}\|x\|)^2 + 2\sigma^2}{\sqrt{n/\delta}}.$$

976 □

**Remark D.5.** In particular, Corollary D.4 applies if the target function  $f^*$  is Lipschitz-continuous with  $B_1 = 0$  and  $B_2 = [f^*]_{\text{Lip}} \leq [f^*]_{\mathcal{B}}$ . However, continuity is not necessary, and even noisy labels would be admissible. We do not pursue this generality here.

## 980 E Proofs of the convergence theorems

In this appendix, we present the proofs of Theorems 2.1 and 3.3. In these, we combine the upper bound of the Rademacher complexity of the unit ball in homogeneous Barron space in form of the generalization bound of Corollary D.4 with a  $\Gamma$ -convergence argument (to guarantee the convergence of minimizers to minimizers). The main ingredients in the proof of  $\Gamma$ -convergence are

- 985 • the compact embedding theorem for homogeneous Barron space (to guarantee that every
- 986 subsequence of  $f_n$  has a convergent subsequence) and
- 987 • the direct approximation theorem for homogeneous Barron space (to obtain a bound on the
- 988 lowest achievable energy using a neural network with  $m$  neurons).

We first present convergence proofs in  $L^p(\mu)$  in Section E.1, followed by proofs of  $\Gamma$ -convergence in Section E.2. We combine the arguments to prove the statements from the main body of the document in Section E.3.

## 992 E.1 Convergence in $L^p(\mu)$

993 We start by establishing convergence in  $L^2(\mu)$  at an explicit convergence rate. Then, using this  $L^2(\mu)$   
994 convergence we will extend this result to general  $L^p(\mu)$ .

995 We introduce one of our main theorem of this section, which gives us an explicit bound of  $L^2(\mu)$ -loss.  
996 For convenience, we denote  $\theta := (a, W, b)$  for the rest of the section.

997 **Theorem E.1** ( $L^2$ -convergence). *Let  $\hat{\theta} \in \operatorname{argmin}_{\theta} \hat{\mathcal{R}}_{n,m,\lambda}(\theta)$ . If  $\delta \geq e^{-n}$ , and  $f^* \in \mathcal{F}_{Q^*}$ , then with  
998 probability at least  $1 - 4\delta$  over the choice of random points  $x_1, \dots, x_n$  we have*

$$\mathcal{R}(f_{\hat{\theta}}) \leq C \left( \frac{(Q^*)^2}{m} (\mathbb{E}[\|x\|^2]) + \lambda Q^* + Q^* (\mathbb{E}\|x\| + \sigma^2 + [f^*]_{\mathcal{B}}) \frac{\log(n/\delta)}{\sqrt{n}} \right)$$

999 up to higher order terms in the small quantities  $(\lambda m)^{-1}, m^{-1}, n^{-1/2} \log n$ .

1000 *Proof. Outline.* We use Theorem C.5 for  $L^2(\mu_n)$  with  $f = f^*$  to obtain a function for which  
1001  $\hat{\mathcal{R}}_{n,m,\lambda}$  is low. The empirical risk minimizer (ERM) has even lower risk. The weight decay penalty  
1002 additionally provides a norm-bound in homogeneous Barron space for the ERM, and we use Corollary  
1003 D.4 to control the generalization gap.

1004 **Step 1.** Due to Theorem C.5, there exists a  $\tilde{\theta} := (\tilde{a}, \tilde{w}, \tilde{b}) \in \mathbb{R}^m \times \mathbb{R}^{m \times d} \times \mathbb{R}^{m+1}$  such that

$$R_{WD}(\tilde{\theta}) \leq [f^*]_{\mathcal{B}} \quad (6)$$

1005 and

$$\hat{\mathcal{R}}_n(f_{\tilde{\theta}}) = [f_{\tilde{\theta}} - f^*]_{L^2(\mu_n)}^2 \leq \frac{4[f^*]^2}{m} \sup_{\|w\|=1} \int_{\mathbb{R}^d} |w^T x|^2 d\mu_n \leq \frac{4[f^*]^2}{m} \left( \frac{1}{n} \sum_{i=1}^n \|x_i\|^2 \right).$$

1006 We will always consider  $\delta$  such that  $\log(1/\delta) \leq n$ . In this regime, plugging-in the bound on the  
1007 second moments of  $\mu_n$  from Lemma H.4 gives the corresponding bound

$$\hat{\mathcal{R}}_n(f_{\tilde{\theta}}) \leq \frac{4[f^*]^2}{m} \left( \mathbb{E}[\|x\|^2] + 8\sigma^2 \sqrt{\frac{\log(1/\delta)}{n}} \right) \quad (7)$$

1008 with probability  $1 - \delta$ . We will assume that this estimate is valid for the remainder of the proof. In  
1009 particular, since  $\hat{\theta}$  minimizes  $\hat{\mathcal{R}}_{n,m,\lambda}$ , we find that

$$\hat{\mathcal{R}}_{n,m,\lambda}(\hat{\theta}) \leq \hat{\mathcal{R}}_{n,m,\lambda}(\tilde{\theta}) \leq \frac{4[f^*]^2}{m} \left( \mathbb{E}[\|x\|^2] + 8\sigma^2 \sqrt{\frac{\log(1/\delta)}{n}} \right) + \lambda [f^*]_{\mathcal{B}}. \quad (8)$$

1010 **Step 2.** Next, we bound  $[f_{\hat{\theta}}]_{\mathcal{B}}$  and  $|f_{\hat{\theta}}(0) - f^*(0)|$  ( $Q$  and  $A$  in Corollary D.4). We first bound the  
1011 Barron semi-norm by

$$[f_{\hat{\theta}}]_{\mathcal{B}} \leq \frac{1}{\lambda} \hat{\mathcal{R}}_{n,m,\lambda}(\hat{\theta}) \leq \frac{1}{\lambda} \hat{\mathcal{R}}_{n,m,\lambda}(\tilde{\theta}).$$

1012 Moving on to bounding  $A$ , we find from the empirical risk bound

$$\min_{1 \leq i \leq n} |f - f^*|(x_i) = \sqrt{\min_{1 \leq i \leq n} |f - f^*|^2(x_i)} \leq \sqrt{\frac{1}{n} \sum_{i=1}^n |f - f^*|(x_i)} \leq \sqrt{\hat{\mathcal{R}}_n(f)}$$

1013 and in particular

$$\min_{1 \leq i \leq n} |f_{\hat{\theta}} - f^*|(x_i) \leq \sqrt{\hat{\mathcal{R}}_{n,m,\lambda}(\tilde{\theta})}.$$

1014 With probability at least  $1 - \delta$ , we have

$$\max_{1 \leq i \leq n} \|x_i\| \leq \mathbb{E}_{x \sim \mu} [\|x\|] + \sigma \sqrt{2 \log(n/\delta)}.$$

1015 by Lemma H.2. Again, we assume that the estimate holds in the following. Hence, the index  $i$  for  
1016 which the minimum is attained in (8) satisfies the bound

$$\|x_i\| \leq \mathbb{E}_{x \sim \mu} [\|x\|] + \sigma \sqrt{2 \log(n/\delta)}.$$

1017 Combining the bounds on  $|f_{\hat{\theta}}(x_i) - f^*(x_i)|$  and the Lipschitz constants of  $f_{\hat{\theta}}, f^*$ , we find that

$$\begin{aligned} |f_{\hat{\theta}} - f^*|(0) &\leq |f_{\hat{\theta}} - f^*|(x_i) + ([f_{\hat{\theta}}]_{\mathcal{B}} + [f^*]_{\mathcal{B}}) \|x_i\| \\ &\leq \sqrt{\widehat{\mathcal{R}}_{n,m,\lambda}(\tilde{\theta})} + \left( [f^*]_{\mathcal{B}} + \frac{1}{\lambda} \widehat{\mathcal{R}}_{n,m,\lambda}(\tilde{\theta}) \right) \left( \mathbb{E}_{x \sim \mu} [\|x\|] + \sigma \sqrt{2 \log(n/\delta)} \right). \end{aligned}$$

1018 **Step 3.** Comparing  $\hat{\theta}$  to  $\tilde{\theta}$ , we observe that

$$\begin{aligned} \mathcal{R}(f_{\hat{\theta}}) &= \widehat{\mathcal{R}}_n(f_{\hat{\theta}}) + \mathcal{R}(f_{\hat{\theta}}) - \widehat{\mathcal{R}}_n(f_{\hat{\theta}}) \\ &\leq \widehat{\mathcal{R}}_{n,m,\lambda}(\hat{\theta}) + \mathcal{R}(f_{\hat{\theta}}) - \widehat{\mathcal{R}}(f_{\hat{\theta}}) \\ &\leq \widehat{\mathcal{R}}_{n,m,\lambda}(\tilde{\theta}) + \mathcal{R}(f_{\hat{\theta}}) - \widehat{\mathcal{R}}_n(f_{\hat{\theta}}) \end{aligned}$$

1019 where we used the fact that  $\hat{\theta}$  is a minimizer of  $\widehat{\mathcal{R}}_{n,m,\lambda}(\theta)$  and (6). In the following, we use the  
1020 bound on  $[f_{\hat{\theta}}]_{\mathcal{B}}$  to control the generalization gap.

1021 **Step 4.** Recall that  $[f_{\hat{\theta}}]_{\mathcal{B}} \leq [f^*]_{\mathcal{B}} + \frac{1}{\lambda} \widehat{\mathcal{R}}_{n,m,\lambda}(f_{\hat{\theta}}) = [f^*]_{\mathcal{B}} + O((\lambda m)^{-1})$ . Thus, with probability  
1022 at least  $1 - 2\delta$ , we obtain the bound

$$(\mathcal{R} - \widehat{\mathcal{R}}_n)(f_{\hat{\theta}}) \leq \left( [f^*]_{\mathcal{B}} + \frac{1}{\lambda} \widehat{\mathcal{R}}_{n,m,\lambda}(\hat{\theta}) \right) (\mathbb{E}\|x\| + \sigma^2 + [f^*]_{\mathcal{B}}) \frac{\log(n/\delta)}{\sqrt{n}}$$

1023 from Corollary D.4 for a slightly modified constant  $C > 0$  (with  $B_1 = 0$ ) and up to higher order  
1024 terms in  $(\lambda m)^{-1}$  and  $n$ .

1025 **Step 5.** By the union bound, all probabilistic bounds hold simultaneously with probability at least  
1026  $1 - 4\delta$ . In this case

$$\mathcal{R}(f_{\hat{\theta}}) \leq C \left( \frac{Q^2}{m} \left( \mathbb{E}[\|x\|^2] + \sigma^2 \sqrt{\frac{\log(1/\delta)}{n}} \right) + \lambda Q + [f^*]_{\mathcal{B}} (\mathbb{E}\|x\| + \sigma^2 + [f^*]_{\mathcal{B}}) \frac{\log(n/\delta)}{\sqrt{n}} \right)$$

1027 up to higher order terms in  $m^{-1}, \log n/\sqrt{n}, (\lambda m)^{-1}$  etc.  $\square$

1028 Since  $\mathcal{R}(\theta) = \|f_{\theta} - f^*\|_{L^2(\mu)}^2$ , we can interpret Theorem E.1 as a convergence statement in  $L^2(\mu)$   
1029 at a suitable rate. The statement generalizes to  $L^p$ -convergence at a rate.

1030 **Corollary E.2** ( $L^p$ -convergence). *Let  $p \in [1, \infty]$  and  $\hat{\theta}$  as in Theorem E.1. Then there exists a*  
1031 *constant  $\tilde{C} > 0$  depending on  $\mathbb{E}\|x\|, \mathbb{E}[\|x\|^2], \sigma^2$  and  $p$  such that*

$$\|f_{\hat{\theta}} - f^*\|_{L^p(\mu)} \leq \tilde{C} \left( \widehat{\mathcal{R}}_{n,m,\lambda}(\hat{\theta})^{1/2} + [f^*]_{\mathcal{B}} \right)^{1-1/p} \|f_{\hat{\theta}} - f^*\|_{L^2(\mu)}^{1/p}.$$

1032 *Proof.* Since  $\mu$  is sub-Gaussian, we note that all moments of  $\mu$  are finite:  $\mathbb{E}[(1 + \|x\|)^q] < \infty$  for  
1033 all  $q \in [1, \infty)$ . In particular, if  $g$  is a measurable function which satisfies  $|g(x)| \leq C_g(1 + \|x\|)$  for  
1034 some  $C > 0$ , then

$$\|g\|_{L^p(\mu)}^p = \mathbb{E}[g \cdot g^{p-1}] \leq \mathbb{E}[g^2]^{1/2} \mathbb{E}[g^{2(p-1)}]^{1/2} = \|g\|_{L^2} \|g\|_{L^{2(p-1)}}^{p-1}.$$

1035 If  $g = f_{\hat{\theta}} - f^* \in \mathcal{B}$ , then by the continuous embedding  $\mathcal{B} \hookrightarrow L^q(\mu)$  we find that

$$\|f_{\hat{\theta}} - f^*\|_{L^{2(p-1)}(\mu)} \leq C (|f_{\hat{\theta}} - f^*|(0) + [f_{\hat{\theta}} - f^*]_{\mathcal{B}}).$$

1036 Recall that  $|f_{\hat{\theta}} - f^*|(0) \leq \widehat{\mathcal{R}}_{n,m,\lambda}(\hat{\theta})^{1/2} + C[f^*]_{\mathcal{B}}$ .  $\square$

1037 We note that Corollary E.2 is generally suboptimal. Indeed, for  $p \leq 2$ , the stronger bound

$$\|f_{\hat{\theta}} - f^*\|_{L^p(\mu)} \leq \|f_{\hat{\theta}} - f^*\|_{L^2(\mu)} = O \left( \left( \frac{1}{m} + \lambda + \frac{\log n}{\sqrt{n}} \right)^{1/2} \right)$$

1038 holds as  $L^2(\mu)$  embeds continuously into  $L^p(\mu)$ .

## 1039 E.2 Gamma-expansion of regularized risk functionals

1040 As before, we denote  $\theta_n = (a, W, b)_n \in \mathbb{R}^{m_n} \times \mathbb{R}^{m_n \times d} \times \mathbb{R}^{m_n+1}$ . Since  $\mathcal{R}(f_\theta) = \|f_\theta - f^*\|_{L^2(\mu)}^2$ ,  
 1041 Theorem E.1 can be taken as a statement that  $f_{\hat{\theta}_n} \rightarrow f^*$  as  $n \rightarrow \infty$  in  $L^2(\mu)$ . However, this does  
 1042 not tell us about the behavior of  $f_{\hat{\theta}_n}$  in a  $\mu$ -null set, i.e. where the distribution  $\mu$  provides us no  
 1043 information. This interpolation between known values can be deduced from our next result. We first  
 1044 present a simplified version, in which we assume that we have already taken the limits  $m, n \rightarrow \infty$   
 1045 before taking  $\lambda \rightarrow 0$ . We couple the limits  $n, m_n, \lambda_n$  below.

1046 We use the notion of  $\Gamma$ -convergence from the calculus of variations. For a brief introduction, see  
 1047 Appendix B.  $\Gamma$ -convergence depends on the underlying topology of the space, and we make the  
 1048 following convention: We say that  $f_\lambda \xrightarrow{\text{good}} f$  if  $f_\lambda \rightarrow f$  locally uniformly (uniformly on compact  
 1049 sets) and in  $L^2(\mu)$ . Other definitions are admissible and lead to the same general theory. Since  
 1050 Barron functions grow at most linearly at  $\infty$  due to Lipschitz-continuity, we note that this is notion  
 1051 of convergence is generated by a metric

$$d(f, g) = \max_{x \in \mathbb{R}^d} \frac{|f(x) - g(x)|}{1 + \|x\|^2}$$

1052 at least on bounded subsets of Barron space. This suffices for all applications below and spares us  
 1053 from considering  $\Gamma$ -convergence on more general topological spaces – which is also possible.

1054 **Theorem E.3.** *Let*

$$\mathcal{R}_\lambda : \mathcal{B} \rightarrow [0, \infty), \quad \mathcal{R}_\lambda(f) = \|f - f^*\|_{L^2(\mu)}^2 + \lambda [f]_{\mathcal{B}}.$$

1055 *We denote*

$$\begin{aligned} F_\lambda : \mathcal{B} &\rightarrow [0, \infty) & F_\lambda(f) &= \frac{\mathcal{R}_\lambda(f)}{\lambda} = \frac{\|f - f^*\|_{L^2(\mu)}^2}{\lambda} + [f]_{\mathcal{B}} \\ F : \mathcal{B} &\rightarrow [0, \infty] & F(f) &= \begin{cases} [f]_{\mathcal{B}} & \text{if } f = f^* \text{ } \mu\text{-a.e.} \\ +\infty & \text{else} \end{cases}. \end{aligned}$$

1056 *Then  $\Gamma\text{-}\lim_{\lambda \rightarrow 0} F_\lambda = F$  with respect to the notion of convergence  $\xrightarrow{\text{good}}$  defined above.*

1057 Notably, the  $\Gamma$ -limit of  $\mathcal{R}_\lambda$  itself would be zero at all points of interest. Rescaling to consider  $F_\lambda$   
 1058 instead has fits into the framework of  $\Gamma$ -expansions considered by Braides and Truskinovsky [2008].  
 1059 Denote

$$\mathcal{F} = \{f \in \mathcal{B} : f \equiv f^* \text{ } \mu\text{-a.e.}\} \quad (9)$$

1060 **Proof. Step 1. liminf-inequality.** First consider  $f \in \mathcal{F}$  and assume that  $\{f_\lambda\}_{\lambda>0}$  is a family of  
 1061 functions such that  $f_\lambda \xrightarrow{\text{good}} f$ .<sup>2</sup> Then by the compactness theorem for Barron functions in coarser  
 1062 topologies (Theorem C.3) we have the following:

$$\liminf_{\lambda \rightarrow 0^+} F_\lambda(f_\lambda) \geq \liminf_{\lambda \rightarrow 0^+} [f_\lambda]_{\mathcal{B}} \geq [f]_{\mathcal{B}} = F(f).$$

1063 Now assume that  $f \notin \mathcal{F}$  and that  $f_\lambda \xrightarrow{\text{good}} f$ . We need to show that  $F_\lambda(f_\lambda) \rightarrow +\infty$ . Since  $f \notin \mathcal{F}$ ,  
 1064 we see that  $\mathcal{R}(f) = \|f - f^*\|_{L^2(\mu)}^2 > 0$ . Denote  $\varepsilon = \sqrt{\mathcal{R}(f)}$  and observe that there exists  $\Lambda > 0$   
 1065 such that  $\|f_\lambda - f\|_{L^2(\mu)} < \varepsilon/2$  for all  $\lambda < \Lambda$  by the definition of the notion of convergence.

1066 In particular, we find that

$$\|f_\lambda - f^*\|_{L^2(\mu)} \geq \|f - f^*\|_{L^2(\mu)} - \|f_\lambda - f\|_{L^2(\mu)} \geq \varepsilon/2$$

1067 for all  $\lambda < \Lambda$  by the inverse triangle inequality and thus

$$\liminf_{\lambda \rightarrow 0^+} F_\lambda(f_\lambda) \geq \liminf_{\lambda \rightarrow 0^+} \frac{(\varepsilon/2)^2}{\lambda} = +\infty.$$

<sup>2</sup> It is easy to generalize this to continuous limits, but if preferred, then  $\lambda = \lambda_n$  can be taken to be a discrete sequence converging to zero.

1068 **Step 2. limsup-inequality.** Again, we first consider the case  $f \in \mathcal{F}$ . Set  $f_\lambda = f$  for all  $\lambda > 0$  and  
 1069 observe that  $f_\lambda \rightarrow f$  as  $\lambda \rightarrow 0^+$  (trivially). By the same argument  $F_\lambda(f_\lambda) = F(f) = [f]_{\mathcal{B}}$  for all  $\lambda$ ,  
 1070 i.e. the constant sequence is a recovery sequence since  $F_\lambda(f_\lambda) \rightarrow F(f)$ .

1071 On the other hand, if  $f \notin \mathcal{F}$ , then  $\mathcal{R}(f) > 0$  and thus  $F_\lambda(f) \rightarrow +\infty = F(f)$ . Again, we can use  
 1072 the constant sequence as a recovery sequence, somewhat trivially.  $\square$

1073 **Corollary E.4.** Assume that  $f_\lambda \in \operatorname{argmin}_{f \in \mathcal{B}} \mathcal{R}_\lambda$ , i.e.  $f_\lambda$  minimizes  $\mathcal{R}_\lambda$ . Then there exists  $\hat{f} \in \mathcal{B}$   
 1074 such that  $f_\lambda \xrightarrow{\text{good}} \hat{f}$ .

1075 *Proof.* Clearly  $f_\lambda$  minimizes  $\mathcal{R}_\lambda$  if and only if it minimizes  $F_\lambda = \lambda^{-1} \mathcal{R}_\lambda$ . We note that

$$[f_\lambda]_{\mathcal{B}} \leq \lambda^{-1} \mathcal{R}_\lambda(f_\lambda) \leq \lambda^{-1} \mathcal{R}(f^*) + [f^*]_{\mathcal{B}} = [f^*]_{\mathcal{B}}.$$

1076 In particular, by the compact embedding of Theorem C.3 there exists  $\hat{f} \in \mathcal{B}$  such that  $f_\lambda \xrightarrow{\text{good}} \hat{f}$  up  
 1077 to subsequence. By the properties of  $\Gamma$ -convergence, we conclude that  $\hat{f}$  is a minimizer of  $F$ .  $\square$

1078 We present a special case of Corollary E.4 in the setting of Proposition 3.2 which exploits the  
 1079 uniqueness of the minimizer. Recall the definition of the radial average in (3) and  $f_d^*$  from Proposition  
 1080 3.2.

1081 **Corollary E.5.** Assume that  $f^*(0) = 1$ ,  $f^*(x) = 0$  if  $\|x\| \geq 1$  and  $\mu$  satisfies the conditons  
 1082 of Theorem 3.3. Assume additionally that  $f_\lambda \in \operatorname{argmin}_{f \in \mathcal{B}} \mathcal{R}_\lambda$ , i.e.  $f_\lambda$  minimizes  $\mathcal{R}_\lambda$ . Then  
 1083  $\operatorname{Av} f_\lambda \xrightarrow{\text{good}} f_d^*$ .

1084 *Proof.* **Step 1.** Clearly  $f_\lambda$  minimizes  $\mathcal{R}_\lambda$  if and only if it minimizes  $F_\lambda = \lambda^{-1} \mathcal{R}_\lambda$ .  $\operatorname{Av} f_\lambda$  is also a  
 1085 minimizer of  $F_\lambda$  since the functional is convex and rotationally symmetric, so by averaging in radial  
 1086 direction, we are taking a (continuous) convex combination of minimizers, which is a minimizer  
 1087 again.

1088 **Step 2.** We find that

$$[\operatorname{Av} f_\lambda]_{\mathcal{B}} \leq F_\lambda(\operatorname{Av} f_\lambda) \leq F_\lambda(f_\lambda) \leq F_\lambda(f_d^*) = [f_d^*]_{\mathcal{B}}.$$

1089 By the compactness theorem for Barron functions, Theorem C.3 there exists  $f \in \mathcal{B}$  such that  
 1090  $\operatorname{Av} f_\lambda \xrightarrow{\text{good}} f$  (up to a subsequence). Since  $F_\lambda \rightarrow F$  in the sense of  $\Gamma$ -convergence, we find that  $f$   
 1091 is a minimizer of  $F$ . Since  $f$  is also radially symmetric, we find by Proposition 3.2 that  $f \equiv f_d^*$ .

1092 **Step 3.** By the exact same logic, we could show that every subsequence of  $\{\operatorname{Av} f_\lambda\}$  has a further  
 1093 subsequence which converges to  $f_d^*$ . By a standard argument in topology, the whole sequence  
 1094 converges.  $\square$

1095 A similar statement can be proved in the more complicated case where  $f_\lambda$  is a neural network with  
 1096 finitely many neurons and  $F_\lambda$  uses a finite data set rather than a continuous expectation. In this case,  
 1097 the parameter  $\lambda$  must be coupled to the number of parameters  $m$  and the number of data points  $n$ ,  
 1098 such that  $\lambda \rightarrow 0$ , but not too quickly. The proof is a more technically challenging variant of those of  
 1099 Theorem E.3 and Corollaries E.4 and E.5 which utilizes the generalization bound of D.4. To this end,  
 1100 we first introduce a new notion of convergence. That is, we define a notion of convergence from the  
 1101 parameter to function. We define a notion of convergence by saying that  $\theta_k := (a_k, W_k, b_k) \xrightarrow{\text{good}} f$   
 1102 iff  $f_{\theta_k} \xrightarrow{\text{good}} f$  as  $k \rightarrow \infty$ .

1103 **Theorem E.6.** Consider the parameter space  $\Theta_m \subseteq \mathbb{R}^m \times \mathbb{R}^{m \times d} \times \mathbb{R}^{m+1}$  of neural networks with  
 1104 a single hidden layer of width  $m$  and the associated functions

$$f_\theta(x) := b_0 + \sum_{i=1}^m a_i \sigma(w_i \cdot x + b_i)$$

1105 Let  $m_n, \lambda_n$  scale with  $n$  according to (1). We denote

$$F_n : \Theta_{m_n} \rightarrow [0, \infty) \quad F_n(\theta) = \frac{\widehat{\mathcal{R}}_{n, m_n, \lambda_n}(\theta)}{\lambda_n} = \frac{\widehat{\mathcal{R}}_n(f_\theta)}{\lambda_n} + R_{WD}(\theta)$$

$$F : \mathcal{B} \rightarrow [0, \infty] \quad F(f) = \begin{cases} [f]_{\mathcal{B}} & \text{if } f = f^* \mu\text{-a.e.} \\ +\infty & \text{else} \end{cases}.$$

1106 Then almost surely over the choice of data points, we have  $\Gamma - \lim_{n \rightarrow \infty} F_n = F$  almost surely with  
 1107 respect to the notion of convergence  $\theta_k \xrightarrow{\text{good}} f$  defined above.

1108 *Proof.* We use  $\mathcal{F}$  as in (9) throughout. In the proof we assume that all stochastic quantities in  
 1109 Corollary D.4 and Theorem E.1 are satisfied with probability at least  $1 - \delta_n$  for  $\delta_n = n^{-2}$ . The  
 1110 quantity  $\log(\delta_n)$  therefore becomes comparable to  $\log n/n \ll \lambda_n$ . Since  $\sum_{n=1}^{\infty} n^{-2} < \infty$ , we find  
 1111 that all conditions are met for all but finitely many  $n \in \mathbb{N}$  by the Borel-Cantelli Lemma. For questions  
 1112 of asymptotic convergence, we may therefore assume that the statements of both Theorems apply  
 1113 without qualifying for high probability. Note that  $n^{-2} \geq e^{-n}$  for all  $n \geq 2$  as needed for Theorem  
 1114 E.1.

1115 **Step 1. liminf-inequality.** Again, we consider the cases  $f \in \mathcal{F}$  and  $f \notin \mathcal{F}$  separately. First,  
 1116 when  $f \in \mathcal{F}$ , we apply the same method we did in Theorem E.3. For any sequence of parameters  
 1117  $\theta_n \xrightarrow{\text{good}} f$ , by Theorem C.3 the following holds:

$$\liminf_{n \rightarrow \infty} F_n(\theta_n) \geq \liminf_{n \rightarrow \infty} R_{WD}(\theta_n) \geq \liminf_{n \rightarrow \infty} [f_{\theta_n}]_{\mathcal{B}} \geq [f]_{\mathcal{B}} = F(f).$$

1118 The second inequality comes from  $[f_{\theta_n}]_{\mathcal{B}}$  being an infimum of weight decay regularizers with any  
 1119 arbitrary probability measure on parameter space.

1120 Second, when  $f \notin \mathcal{F}$ , we need to show  $\liminf_{n \rightarrow \infty} F_n(\theta_n) = \infty$  for any  $\theta_n \xrightarrow{\text{good}} f$ . We distinguish  
 1121 two prototypical cases:

- 1122 1.  $[f_{\theta_n}]_{\mathcal{B}} \rightarrow +\infty$  as  $n \rightarrow \infty$ . In this case  $F(\theta_n) \geq [f_{\theta_n}]_{\mathcal{B}} \rightarrow +\infty$  as well by the same logic  
 1123 as above.
- 1124 2.  $\limsup_{n \rightarrow \infty} [f_{\theta_n}]_{\mathcal{B}} < +\infty$ . In this case, we take  $\varepsilon := \|f - f^*\|_{L^2(\mu)}/2 > 0$ . Then there  
 1125 exists  $N \in \mathbb{N}$  such that for all  $n \geq N$  we have

$$\|f_{\theta_n} - f^*\|_{L^2(\mu)} \geq \|f - f^*\|_{L^2(\mu)} - \|f_{\theta_n} - f\|_{L^2(\mu)} \geq \varepsilon$$

1126 for all  $n \geq N$  by definition. Additionally

$$\begin{aligned} F_n(\theta_n) &\geq \frac{\widehat{\mathcal{R}}_n(f_{\theta_n}) - \mathcal{R}(f_{\theta_n})}{\lambda_n} + \frac{\mathcal{R}(f_{\theta_n})}{\lambda_n} + [f_{\theta_n}]_{\mathcal{B}} \\ &\geq \frac{\widehat{\mathcal{R}}_n(f_{\theta_n}) - \mathcal{R}(f_{\theta_n})}{\lambda_n} + \frac{\varepsilon^2}{\lambda_n} + [f_{\theta_n}]_{\mathcal{B}}. \end{aligned}$$

1127 Due to Corollary D.4 and the arguments of Theorem E.1 to control the discrepancy at 0, we  
 1128 have

$$\widehat{\mathcal{R}}_n(f_{\theta_n}) - \mathcal{R}(f_{\theta_n}) = O\left(\frac{\log n}{\sqrt{n}}\right).$$

1129 in this case. Since  $\log n/\sqrt{n} \ll \lambda_n$  by assumption, we note that

$$\lim_{n \rightarrow \infty} \frac{\widehat{\mathcal{R}}_n(f_{\theta_n}) - \mathcal{R}(f_{\theta_n})}{\lambda_n} = 0$$

1130 and thus

$$\lim_{n \rightarrow \infty} F_n(\theta_n) \geq \liminf_{n \rightarrow \infty} \left(0 + \frac{\varepsilon^2}{\lambda_n} + 0\right) = +\infty.$$

1131 The same holds in the general case by passing to subsequences.

1132 **Step 2. limsup-inequality.** As in Theorem C.5 the case  $f \notin \mathcal{F}$  follows from the lim inf-inequality in  
 1133 an essentially trivial fashion. We therefore only consider the case  $f \in \mathcal{F}$ . An approximating sequence  
 1134 in this case is constructed from Theorem C.5 as in Theorem E.1 or Theorem E.3. Namely, we find  $\tilde{\theta}_n$   
 1135 such that

$$F_n(\tilde{\theta}_n) \leq \frac{C}{\lambda_n m_n} \left(1 + \frac{\log n}{\sqrt{n}}\right) + [f^*]_{\mathcal{B}} \quad \Rightarrow \quad \limsup_{n \rightarrow \infty} F_n(\tilde{\theta}_n) \leq [f^*]_{\mathcal{B}}. \quad \square$$



**Remark E.7.** The key ingredients for the proofs of both Theorem E.1 and Theorem E.6 are Theorem C.5 and Corollary D.4 but they are combined differently. While they are paired in Theorem E.1 to obtain a precise rate, they occur separately in Theorem E.6. Theorem C.5 is used for the  $\limsup$ -inequality while Corollary D.4 enters in the proof of the  $\liminf$ -inequality. Analogously, the condition  $\lambda_n \ll \log n / \sqrt{n}$  is used in the proof of the  $\liminf$ -condition while the fact that  $\frac{1}{m_n} \ll \lambda_n$  is used in the proof of the  $\limsup$ -inequality.

### E.3 Proofs of the main theorems

The statements of the Theorems in the main body of the text can easily be deduced from the statements proved in this Appendix.

*Proof of Theorem 2.1.* Convergence in  $L^p$  holds by Theorem E.1 for  $1 \leq p \leq 2$  and Corollary E.2 (general  $p$ ). The proof of uniform convergence follows from Theorem E.6 in the same fashion that Corollary E.4 follows from Theorem E.3. The explicit bound is obtained from Theorem E.1 with  $\delta_n = \frac{1}{4n^2}$ .  $\square$

*Proof of Theorem 3.3.* This follows in the same way as the proof of Theorem 2.1 with modifications as in Corollary E.5.  $\square$

### F Theorem 2.1 for finite data sets

Finally, we note that a version of Theorem 2.1 holds if the data set  $S = \{x_1, \dots, x_n\}$  is kept fixed. The proof is a combination of those of Theorems E.3 and E.6, as we deal with a finite approximating neural network, but do not require generalization bounds. The details are left to the reader.

**Theorem F.1.** We make the following assumptions.

1. Let  $S = \{(x_1, y_1), \dots, (x_n, y_n)\}$  be a fixed dataset of  $n$  data points in  $x_i \in \mathbb{R}^d$  and labels  $y_i \in \mathbb{R}$ .
2. Let the loss function  $\ell(f, y)$  be the mean squared error  $\ell_{MSE}(f, y) = |f - y|^2$ .
3. Assume that  $\lambda_m$  is a sequence of parameters such that  $\lambda_m \rightarrow 0$ ,  $1/m \ll \lambda_m$  as  $m \rightarrow \infty$ .

Consider the regularized empirical risk functional  $\hat{\mathcal{R}}_m : \mathbb{R}^m \times \mathbb{R}^{m \times d} \times \mathbb{R}^m \rightarrow [0, \infty)$ ,

$$\hat{\mathcal{R}}_m(a, W, b) = \frac{1}{2n} \sum_{i=1}^n \ell(f_{(a, W, b)}(x_i), y_i) + \frac{\lambda_m}{2} (\|a\|_2^2 + \|W\|_{Frob}^2).$$

Then if  $(a, W, b)_m \in \operatorname{argmin} \hat{\mathcal{R}}_m$  for all  $m \in \mathbb{N}$ , then every subsequence of  $f_m := f_{(a, W, b)_m}$  has a further subsequence which converges to some limit  $\hat{f}^* \in \mathcal{B}$  uniformly on compact subset of  $\mathbb{R}^d$ . The limiting function satisfies

$$\hat{f}^* \in \operatorname{argmin}_{\{f \in \mathcal{B} : f(x_i) = y_i \ \forall i\}} [f]_{\mathcal{B}}.$$

### G Minimum norm interpolation in one dimension

*Proof of Proposition 3.1.* Any Barron function  $f$  is also Lipschitz-continuous, in particular differentiable almost everywhere and  $f(b) - f(a) = \int_a^b f'(x) dx$  for all  $a, b \in \mathbb{R}$  by Rademacher's Theorem (see e.g. [Evans and Gariepy, 2015, Section 3.1]). In particular, there exist points  $x^+, x^- \in (a, b)$  such that

$$f'(x^-) \leq \frac{f(b) - f(a)}{b - a} = \frac{1}{b - a} \int_a^b f'(x) dx \leq f'(x^+).$$

If  $f'$  is not constant, both inequalities are satisfied strictly. Under the assumptions, there exists  $a \in (x_0, x_1)$  and  $b \in (x_{n-1}, x_n)$  such that

$$f'(a) \leq \frac{f(x_1) - f(x_0)}{x_1 - x_0} \leq 0 \leq \frac{f(x_n) - f(x_{n-1})}{x_n - x_{n-1}} \leq f'(b). \quad (10)$$

1171 Since the derivative  $f'$  changes sign, we conclude by [Wojtowysch, 2022, Proposition 2.5] that  
 1172  $[f]_{\mathcal{B}} = \int_{-\infty}^{\infty} d|\mu|$  where the Radon measure  $\mu$  is the distributional derivative of  $f'$  and  $|\mu|$  denotes  
 1173 the total variation measure of  $\mu$ . Since  $f'$  is differentiable at  $a, b$ , neither point is an atom of  $\mu$  and  
 1174 thus

$$\frac{f(x_n) - f(x_{n-1})}{x_n - x_{n-1}} - \frac{f(x_1) - f(x_0)}{x_1 - x_0} \leq f'(b) - f'(a) \leq \int_a^b d\mu \leq \int_a^b d|\mu| \leq [f]_{\mathcal{B}}.$$

1175 Equality holds if and only if  $|\mu| = \mu$ , i.e. if  $\mu \geq 0$  in the sense of signed measures and if and only  
 1176 if the inequality in (10) can only be satisfied with equality. The first condition means that  $f$  must  
 1177 be convex, the second implies that the derivative of  $f$  must be constant in the intervals  $(x_0, x_1)$  and  
 1178  $(x_{n-1}, x_n)$ . The same can easily be seen for the larger intervals  $(-\infty, x_1)$  and  $(x_{n-1}, \infty)$ .  $\square$

## 1179 H Sub-Gaussian random variables

1180 In this Appendix we quickly gather some facts about sub-Gaussian random variables. For the reader's  
 1181 convenience, we provide full proofs. Experts are encouraged to skip ahead to Appendix D.

1182 The first property we observe is a bound of expected maximum value of sub-Gaussian.

1183 **Lemma H.1.** *Let  $\mu$  be  $\sigma^2$ -sub-Gaussian, and for  $i = 1, \dots, n$ , let  $x_i$  be a iid random samples from*  
 1184 *a law  $\mu$ . Then, the following holds:*

$$\mathbb{E} \left[ \max_{1 \leq i \leq n} \|x_i\| \right] \leq \mathbb{E}_{x \sim \mu} [\|x\|] + \sqrt{2 \log n} \sigma.$$

1185 *Proof.* From the sub-Gaussian assumption we have

$$\log \left( \mathbb{E}_{x \sim \mu} \left[ \exp \left( \lambda (\|X\| - \mathbb{E}[\|X\|]) \right) \right] \right) \leq \frac{\sigma^2 \lambda^2}{2}$$

1186 for some fixed  $\sigma > 0$  and all  $\lambda > 0$ . In particular, Jensen's inequality implies the sub-Gaussian  
 1187 maximal inequality

$$\begin{aligned} \mathbb{E} \left[ \max_{1 \leq i \leq n} \|x_i\| \right] &= \mathbb{E}_{x \sim \mu} [\|x\|] + \mathbb{E} \left[ \max_{1 \leq i \leq n} (\|x_i\| - \mathbb{E}[\|x_i\|]) \right] \\ &\leq \mathbb{E}_{x \sim \mu} [\|x\|] + \frac{1}{\lambda} \log \left( \mathbb{E} \left[ \exp \left( \lambda \max_{1 \leq i \leq n} (\|x_i\| - \mathbb{E}[\|x_i\|]) \right) \right] \right) \\ &\leq \mathbb{E}_{x \sim \mu} [\|x\|] + \frac{1}{\lambda} \log \left( \mathbb{E} \left[ \sum_{i=1}^n \exp \left( \lambda (\|x_i\| - \mathbb{E}[\|x_i\|]) \right) \right] \right) \\ &\leq \mathbb{E}_{x \sim \mu} [\|x\|] + \frac{1}{\lambda} \log \left( \sum_{i=1}^n \mathbb{E} \left[ \exp \left( \lambda (\|x_i\| - \mathbb{E}[\|x_i\|]) \right) \right] \right) \\ &= \mathbb{E}_{x \sim \mu} [\|x\|] + \frac{1}{\lambda} \log \left( n \exp \left( \frac{\lambda^2 \sigma^2}{2} \right) \right) \\ &\leq \mathbb{E}_{x \sim \mu} [\|x\|] + \frac{\log n}{\lambda} + \frac{\sigma^2}{2} \lambda \end{aligned}$$

1188 for all  $\lambda > 0$ . We specifically select  $\lambda = \sqrt{\frac{2 \log n}{\sigma^2}}$ , making the bound

$$\mathbb{E} \left[ \max_{1 \leq i \leq n} \|x_i\| \right] \leq \mathbb{E}_{x \sim \mu} [\|x\|] + \sqrt{2 \log n} \sigma. \quad \square$$

1189 Next, we observe the concentration of maximum values among samples of sub-Gaussian distribution.

1190 **Lemma H.2.** *Let  $\mu$  be  $\sigma^2$ -sub-Gaussian, and for  $i = 1, \dots, n$ , let  $x_i$  be a iid random samples from*  
 1191 *a law  $\mu$ . Then, with probability at least  $1 - \delta$ , the following holds:*

$$\max_{1 \leq i \leq n} \|x_i\| \leq \mathbb{E}_{x \sim \mu} [\|x\|] + \sigma \sqrt{2 \log(n/\delta)}.$$

1192 *Proof.* For all  $t > 0$ , we observe that

$$\begin{aligned} \mu^n \left( \max_{1 \leq i \leq n} \|x_i\| \geq \mathbb{E}_{x \sim \mu} [\|x\|] + t \right) &= \mu^n \left( \max_{1 \leq i \leq n} \exp(\lambda(\|x_i\| - \mathbb{E}\|x_i\|)) \geq \exp(\lambda t) \right) \\ &\leq e^{-\lambda t} \mathbb{E} \left[ \max_{1 \leq i \leq n} \exp((\lambda(\|x_i\| - \mathbb{E}\|x_i\|))) \right] \\ &\leq e^{-\lambda t} \sum_{i=1}^n \mathbb{E} [\exp((\lambda(\|x_i\| - \mathbb{E}\|x_i\|)))] \\ &\leq n \exp \left( -\lambda t + \frac{\lambda^2 \sigma^2}{2} \right). \end{aligned}$$

1193 For fixed  $t$ , the bound becomes tightest for  $\lambda = t/\sigma^2$  with

$$\mu^n \left( \max_{1 \leq i \leq n} \|x_i\| \geq \mathbb{E}_{x \sim \mu} [\|x\|] + t \right) \leq n \exp \left( -\frac{t^2}{2\sigma^2} \right) \leq \delta$$

1194 if

$$-\frac{t^2}{2\sigma^2} \leq \log \left( \frac{\delta}{n} \right) \quad \Leftrightarrow \quad t \geq \sigma \sqrt{2 \log(n/\delta)}.$$

1195 Thus with probability at least  $1 - \delta$ , we have

$$\max_{1 \leq i \leq n} \|X_i\| \leq R_n := \mathbb{E}_{x \sim \mu} [\|x\|] + \sigma \sqrt{2 \log(n/\delta)}. \quad \square$$

1196 In the following Lemma, we investigate expectation of squared norm of sub-Gaussian near the tail.

1197 **Lemma H.3.** Let  $\mu$  be  $\sigma^2$ -sub-Gaussian distribution in  $\mathbb{R}^d$ . For any  $R > \mathbb{E}_{x \sim \mu} \|x\|$ , we have the  
1198 following:

$$\mathbb{E}_{x \sim \mu} [\|x\|^2 1_{B_R(0)^c}(x)] \leq \exp \left( -\frac{(R - \mathbb{E}\|x\|)^2}{4\sigma^2} \right) \sqrt{2\pi} \left( (\mathbb{E}\|x\|)^2 + 2\sigma^2 \right).$$

1199 *Proof.* Recall that

$$\mu \left( \{x : \|x\| \geq (\mathbb{E}_{x' \sim \mu} \|x'\| + t)\} \right) \leq \exp \left( -\frac{t^2}{2\sigma^2} \right)$$

1200 as demonstrated in the proof of Lemma [H.1](#) (consider  $n = 1$ ). Thus

$$\begin{aligned} \mathbb{E}_{x \sim \mu} [\|x\|^2 1_{B_R(0)^c}(x)] &\leq \int_R^\infty s^2 \mu(\{\|x\| \geq s\}) \, ds \leq \int_R^\infty s^2 \exp \left( -\frac{(s - \mathbb{E}\|x\|)^2}{2\sigma^2} \right) \, ds \\ &\leq \exp \left( -\frac{(R - \mathbb{E}\|x\|)^2}{4\sigma^2} \right) \int_R^\infty \exp \left( -\frac{(s - \mathbb{E}\|x\|)^2}{4\sigma^2} \right) \, ds \\ &\leq \exp \left( -\frac{(R - \mathbb{E}\|x\|)^2}{4\sigma^2} \right) \int_R^\infty \exp \left( -\frac{(s - \mathbb{E}\|x\|)^2}{4\sigma^2} \right) \, ds \\ &= \exp \left( -\frac{(R - \mathbb{E}\|x\|)^2}{4\sigma^2} \right) \sqrt{2\pi} \left( (\mathbb{E}\|x\|)^2 + 2\sigma^2 \right). \end{aligned}$$

1201 □

1202 In next Lemma we introduce how the mean of squared norm of sub-Gaussian is concentrated.

1203 **Lemma H.4.** Assume  $\mu$  is a  $\sigma^2$ -sub-Gaussian distribution in  $\mathbb{R}^d$ . Let  $x_1, \dots, x_n$  be iid random  
1204 samples from law  $\mu$ . Then, with probability at least  $1 - \delta$ ,

$$\frac{1}{n} \sum_{i=1}^n \|x_i\|^2 \leq \mathbb{E}_{x \sim \mu} [\|x\|^2] + 8\sigma^2 \max \left( \frac{\log(1/\delta)}{n}, \sqrt{\frac{\log(1/\delta)}{n}} \right).$$

1205 In particular, if  $\delta \geq e^{-n}$  then

$$\frac{1}{n} \sum_{i=1}^n \|x_i\|^2 \leq \mathbb{E}[\|x\|^2] + 8\sigma^2 \sqrt{\frac{\log(1/\delta)}{n}}$$

1206 with probability at least  $1 - \delta$ .

1207 *Proof.* Firstly since  $\|x_i\|$  is  $\sigma^2$ -sub-Gaussian, from [Honorio and Jaakkola, 2014, Appendix B] we  
 1208 observe that  $\|x_i\|^2$  is  $(4\sqrt{2}\sigma^2, 4\sigma^2)$ -sub-exponential. Next, by independence, for all  $\lambda > 0$  and for  
 1209 all  $|t| \leq \frac{1}{4\sigma^2}$  we have the following:

$$\begin{aligned} \mathbb{E} \left[ \exp \left( \lambda \left( \sum_{i=1}^n \|x_i\|^2 - \mathbb{E} \left[ \sum_{i=1}^n \|x_i\|^2 \right] \right) \right) \right] &= \prod_{i=1}^n \mathbb{E} \left[ \exp \left( \lambda (\|x_i\|^2 - \mathbb{E}[\|x_i\|^2]) \right) \right] \\ &\leq \prod_{i=1}^n \exp \left( \frac{32\sigma^4 \lambda^2}{2} \right) \\ &= \exp \left( \frac{32n\sigma^4 \lambda^2}{2} \right) \end{aligned}$$

1210 which implies that  $\sum_{i=1}^n \|x_i\|^2$  is  $(4\sqrt{2}n\sigma^2, 4\sigma^2)$ -sub-exponential. Thus the tail bound of sub-  
 1211 exponential [Adams, 2022, Proposition 2.38] applied to  $\sum_{i=1}^n \|x_i\|^2$  yields

$$\mu^n \left( \left| \sum_{i=1}^n \|x_i\|^2 - \mathbb{E} \left[ \sum_{i=1}^n \|x_i\|^2 \right] \right| \geq s \right) \leq \exp \left( -\frac{1}{2} \min \left( \frac{s^2}{32n\sigma^4}, \frac{s}{4\sigma^2} \right) \right)$$

1212 Plugging-in  $s = nt$ , we have the following:

$$\mu^n \left( \left| \frac{1}{n} \sum_{i=1}^n \|x_i\|^2 - \mathbb{E}_{x \sim \mu} \|x\|^2 \right| \geq t \right) \leq \exp \left( -\frac{1}{2} n \min \left( \frac{t^2}{32\sigma^4}, \frac{t}{4\sigma^2} \right) \right)$$

1213 Lastly, take  $\delta = \exp \left( -\frac{1}{2} n \min \left( \frac{t^2}{32\sigma^4}, \frac{t}{4\sigma^2} \right) \right)$ . By rearranging the  $t$  with respect to  $\delta$ , we have the  
 1214 following:

$$\mu^n \left( \left| \frac{1}{n} \sum_{i=1}^n \|x_i\|^2 - \mathbb{E}_{x \sim \mu} \|x\|^2 \right| \geq 8\sigma^2 \max \left( \sqrt{\frac{\log(1/\delta)}{n}}, \frac{\log(1/\delta)}{n} \right) \right) \leq \delta.$$

1215 This proves the first part of the Lemma. Specifically, we have the following:

$$\begin{aligned} \mu^n \left( \left| \frac{1}{n} \sum_{i=1}^n \|x_i\|^2 - \mathbb{E}_{x \sim \mu} \|x\|^2 \right| \geq 8\sigma^2 \frac{\log(1/\delta)}{n} \right) &\leq \delta \quad \text{if } \delta \leq e^{-n} \\ \mu^n \left( \left| \frac{1}{n} \sum_{i=1}^n \|x_i\|^2 - \mathbb{E}_{x \sim \mu} \|x\|^2 \right| \geq 8\sigma^2 \sqrt{\frac{\log(1/\delta)}{n}} \right) &\leq \delta \quad \text{if } \delta \geq e^{-n} \end{aligned}$$

1216 The second inequality proves the last part of the Lemma. □
